# Supplementary material
Source: publisher site journal article supplement (https://www.dovepress.com/article/338019)
Supplement: Supplementary file 1 [file get_supplementary_file.php]

### **Supplementary Figure legends:**

Figure S1: Subcellular localization of PROSER2-AS1 predicted by the online tools LncSLdb (A) and IncATLAS (B).

Figure S2: Twenty-eight PROSER2-AS1-miRNA pairs identified by LncRNASNP2. (A)The first part of PROSER2-AS1-miRNA pairs identified by LncRNASNP2, (B)The second part of PROSER2-AS1-miRNA pairs identified by LncRNASNP2, (C)The third part of PROSER2-AS1-miRNA pairs identified by LncRNASNP2, (D) The name of PROSER2-AS1 in LncRNASNP2.

Table S1: Two hundred seventy miRNA-mRNA pairs identified by miRWalk3.0.

Table S2: The immune-related gene list downloaded from ImmPort.

# Figure S1

## A

**Gene: PROSER2-AS1**

Ensembl ID: [ENSG00000225778](#)

Alias:

Genome Location: [chr10:11891612-11936699\(-\)](#)

Version: [ensembl\\_75\\_GRCh37](#)

Genome Location: [chr10:11849608-11894700\(-\)](#)

Version: [ensembl\\_92\\_GRCh38](#)

Biotype: antisense

Species: Human

**Transcript: ENST00000445498** [🔗](#) [📄](#)

Genome Location: [chr10:11891612-11936699\(-\)](#)

Version: [ensembl\\_75\\_GRCh37](#)

Genome Location: [chr10:11849608-11894700\(-\)](#)

Version: [ensembl\\_92\\_GRCh38](#)

Biotype: antisense

Unspliced Sequence: [click for detail](#)

ENST00000445498

Location: Nucleus/Cytoplasm Cell: K562 Method: RNA-Seq PMID: 22955988

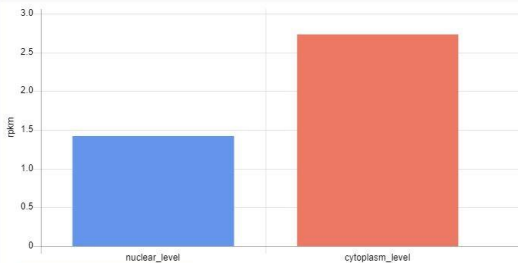

## B

**H19 : PROSER2-AS1 : MALAT1**

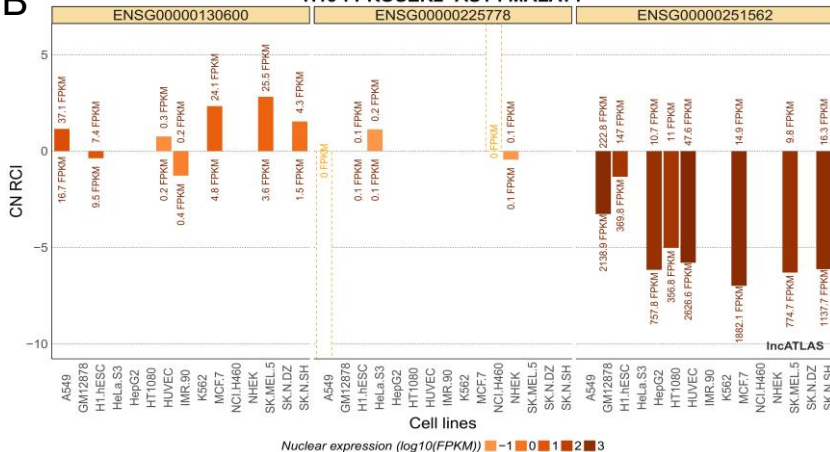

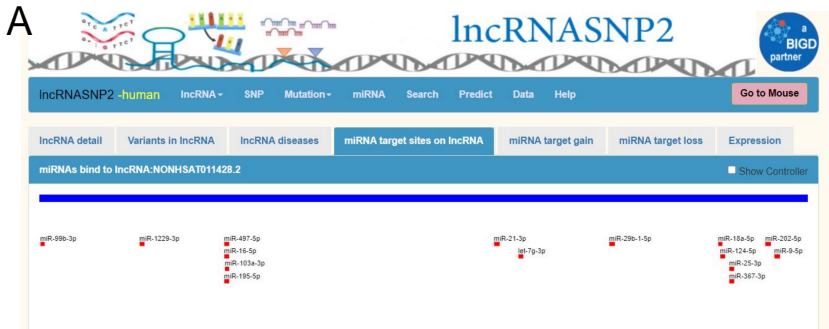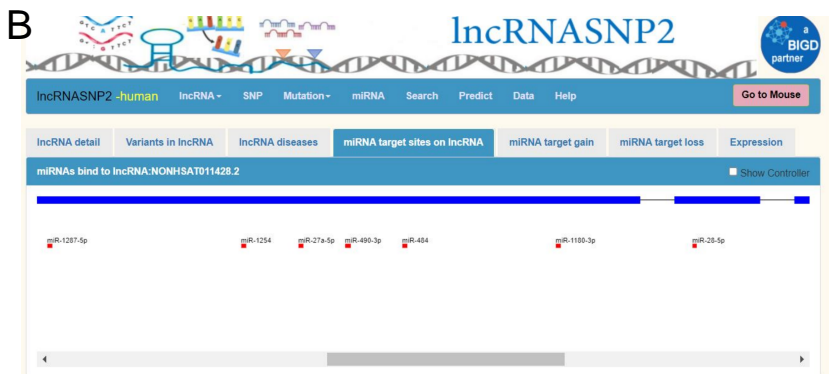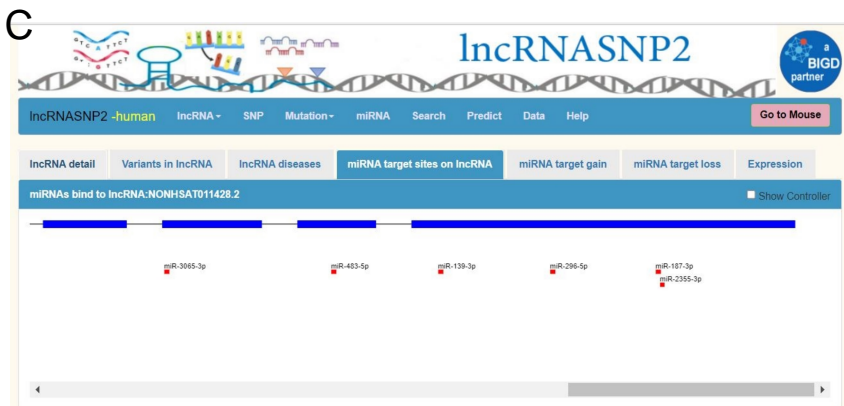

**D**

| lncRNA          | lncRNA alias            |
|-----------------|-------------------------|
| NONHSAT011428.2 | PROSER2-AS1:1,NR_038222 |

Table S1

| miRNA ID        | Gene Symbol |
|-----------------|-------------|
| hsa-miR-103a-3p | DYRK2       |
| hsa-miR-103a-3p | VCAN        |
| hsa-miR-103a-3p | RUNX1T1     |
| hsa-miR-103a-3p | ARL8A       |
| hsa-miR-103a-3p | MEF2D       |
| hsa-miR-103a-3p | PURB        |
| hsa-miR-103a-3p | NAA15       |
| hsa-miR-103a-3p | ZNF449      |
| hsa-miR-103a-3p | N4BP1       |
| hsa-miR-103a-3p | PRR14L      |
| hsa-miR-103a-3p | NUP50       |
| hsa-miR-103a-3p | HIC2        |
| hsa-miR-103a-3p | DES1        |
| hsa-miR-103a-3p | UBE2R2      |
| hsa-miR-103a-3p | MTMR3       |
| hsa-miR-103a-3p | ZBTB10      |
| hsa-miR-103a-3p | FURIN       |
| hsa-miR-103a-3p | PAFAH1B2    |
| hsa-miR-103a-3p | PDK4        |
| hsa-miR-103a-3p | SALL1       |
| hsa-miR-103a-3p | KLF4        |
| hsa-miR-103a-3p | CAPZA2      |
| hsa-miR-103a-3p | AGO1        |
| hsa-miR-103a-3p | G3BP2       |
| hsa-miR-103a-3p | C16orf72    |
| hsa-miR-103a-3p | KIF5A       |
| hsa-miR-103a-3p | CUL4A       |
| hsa-miR-103a-3p | ELK4        |
| hsa-miR-103a-3p | FGF2        |
| hsa-miR-103a-3p | PLEKHA1     |
| hsa-miR-103a-3p | ZHX1        |
| hsa-miR-103a-3p | NDEL1       |
| hsa-miR-103a-3p | SREK1       |
| hsa-miR-103a-3p | CAB39       |
| hsa-miR-103a-3p | AGFG1       |
| hsa-miR-103a-3p | TLK1        |
| hsa-miR-103a-3p | TNRC6B      |
| hsa-miR-103a-3p | ABL2        |
| hsa-miR-103a-3p | LCOR        |
| hsa-miR-103a-3p | GGA3        |
| hsa-miR-103a-3p | YAF2        |
| hsa-miR-103a-3p | PDE4D       |
| hsa-miR-103a-3p | SUN2        |
| hsa-miR-103a-3p | CALU        |
| hsa-miR-103a-3p | PIK3R1      |
| hsa-miR-16-5p   | PPM1D       |
| hsa-miR-16-5p   | ACVR2A      |
| hsa-miR-16-5p   | UBE2V1      |
| hsa-miR-16-5p   | DIXDC1      |
| hsa-miR-16-5p   | C1orf21     |
| hsa-miR-16-5p   | CCNT2       |
| hsa-miR-16-5p   | PIP4P1      |

|                |         |
|----------------|---------|
| hsa-miR-16-5p  | TXN2    |
| hsa-miR-16-5p  | TMEM154 |
| hsa-miR-16-5p  | EZH1    |
| hsa-miR-16-5p  | RPS6KA3 |
| hsa-miR-16-5p  | TSC22D2 |
| hsa-miR-16-5p  | ARMCX2  |
| hsa-miR-16-5p  | RAB9B   |
| hsa-miR-16-5p  | GALNT7  |
| hsa-miR-16-5p  | CDC37L1 |
| hsa-miR-16-5p  | UBFD1   |
| hsa-miR-16-5p  | MTMR3   |
| hsa-miR-16-5p  | PSAT1   |
| hsa-miR-16-5p  | ZMAT3   |
| hsa-miR-16-5p  | IPPK    |
| hsa-miR-16-5p  | TAOK1   |
| hsa-miR-16-5p  | SRPK1   |
| hsa-miR-16-5p  | HMGA2   |
| hsa-miR-16-5p  | EFNB2   |
| hsa-miR-16-5p  | ARL3    |
| hsa-miR-16-5p  | KIF3B   |
| hsa-miR-16-5p  | ONECUT2 |
| hsa-miR-16-5p  | CAPZA2  |
| hsa-miR-16-5p  | SRP72   |
| hsa-miR-16-5p  | RAB30   |
| hsa-miR-16-5p  | KIF1B   |
| hsa-miR-16-5p  | TBL1XR1 |
| hsa-miR-16-5p  | ZC3H11A |
| hsa-miR-16-5p  | CCND2   |
| hsa-miR-16-5p  | FNTA    |
| hsa-miR-16-5p  | BCL2    |
| hsa-miR-16-5p  | SLC6A4  |
| hsa-miR-16-5p  | TMCC1   |
| hsa-miR-16-5p  | AHCYL2  |
| hsa-miR-16-5p  | CDV3    |
| hsa-miR-16-5p  | DMTF1   |
| hsa-miR-16-5p  | LUZP1   |
| hsa-miR-16-5p  | PPP6R3  |
| hsa-miR-16-5p  | CLDN2   |
| hsa-miR-16-5p  | FBXL20  |
| hsa-miR-16-5p  | DICER1  |
| hsa-miR-16-5p  | TGFBR3  |
| hsa-miR-16-5p  | ARL2    |
| hsa-miR-16-5p  | VEGFA   |
| hsa-miR-16-5p  | BACE1   |
| hsa-miR-16-5p  | CHEK1   |
| hsa-miR-18a-5p | CREBL2  |
| hsa-miR-18a-5p | RORA    |
| hsa-miR-18a-5p | UBTD2   |
| hsa-miR-18a-5p | JMY     |
| hsa-miR-18a-5p | NEDD9   |
| hsa-miR-18a-5p | TWF1    |
| hsa-miR-18a-5p | UBE2G1  |
| hsa-miR-18a-5p | SMAD2   |
| hsa-miR-18a-5p | ESR1    |

|                |           |
|----------------|-----------|
| hsa-miR-18a-5p | STK4      |
| hsa-miR-18a-5p | HMGCS1    |
| hsa-miR-18a-5p | IRF2      |
| hsa-miR-18a-5p | VMA21     |
| hsa-miR-18a-5p | NR3C1     |
| hsa-miR-18a-5p | EXPH5     |
| hsa-miR-18a-5p | PDE4D     |
| hsa-miR-195-5p | TNRC6B    |
| hsa-miR-195-5p | SBNO1     |
| hsa-miR-195-5p | CDV3      |
| hsa-miR-195-5p | GABARAPL1 |
| hsa-miR-195-5p | SELENOI   |
| hsa-miR-195-5p | NOL4L     |
| hsa-miR-195-5p | RASEF     |
| hsa-miR-195-5p | DICER1    |
| hsa-miR-195-5p | TAB3      |
| hsa-miR-195-5p | TBL1XR1   |
| hsa-miR-195-5p | TSC22D2   |
| hsa-miR-195-5p | AVL9      |
| hsa-miR-195-5p | CDC37L1   |
| hsa-miR-195-5p | ETNK1     |
| hsa-miR-195-5p | MIB1      |
| hsa-miR-195-5p | PPP1R11   |
| hsa-miR-195-5p | UBE2V1    |
| hsa-miR-195-5p | TAOK1     |
| hsa-miR-195-5p | MAFK      |
| hsa-miR-195-5p | PAFAH1B2  |
| hsa-miR-195-5p | EFNB2     |
| hsa-miR-195-5p | BAG4      |
| hsa-miR-195-5p | ARIH1     |
| hsa-miR-195-5p | PURA      |
| hsa-miR-195-5p | PSKH1     |
| hsa-miR-195-5p | YWHAQ     |
| hsa-miR-195-5p | SHOC2     |
| hsa-miR-195-5p | VPS4A     |
| hsa-miR-195-5p | CCNE1     |
| hsa-miR-195-5p | KANK1     |
| hsa-miR-195-5p | ACVR2A    |
| hsa-miR-195-5p | CCND2     |
| hsa-miR-195-5p | BCL2      |
| hsa-miR-195-5p | PLEKHA1   |
| hsa-miR-195-5p | ACTR2     |
| hsa-miR-195-5p | SERBP1    |
| hsa-miR-195-5p | WIPI2     |
| hsa-miR-195-5p | ZBTB34    |
| hsa-miR-195-5p | CASK      |
| hsa-miR-195-5p | APP       |
| hsa-miR-195-5p | LUZP1     |
| hsa-miR-195-5p | FAM122B   |
| hsa-miR-195-5p | CPEB3     |
| hsa-miR-195-5p | TGFBR3    |
| hsa-miR-195-5p | VEGFA     |
| hsa-miR-195-5p | BZW1      |
| hsa-miR-195-5p | CCNT2     |

|                |          |
|----------------|----------|
| hsa-miR-195-5p | CHEK1    |
| hsa-miR-25-3p  | GFPT2    |
| hsa-miR-25-3p  | PCMTD1   |
| hsa-miR-25-3p  | RNF4     |
| hsa-miR-25-3p  | CCSER2   |
| hsa-miR-25-3p  | ITPRID2  |
| hsa-miR-25-3p  | SLC25A32 |
| hsa-miR-25-3p  | YIPF4    |
| hsa-miR-25-3p  | RGS3     |
| hsa-miR-25-3p  | SESN3    |
| hsa-miR-25-3p  | PDZD8    |
| hsa-miR-25-3p  | SPRYD4   |
| hsa-miR-25-3p  | RSBN1    |
| hsa-miR-25-3p  | PER2     |
| hsa-miR-25-3p  | DSC2     |
| hsa-miR-25-3p  | KLHL15   |
| hsa-miR-25-3p  | LHFPL2   |
| hsa-miR-25-3p  | GOLGA3   |
| hsa-miR-25-3p  | BTG2     |
| hsa-miR-25-3p  | TENT4A   |
| hsa-miR-25-3p  | MYLIP    |
| hsa-miR-25-3p  | SERTAD3  |
| hsa-miR-25-3p  | GNAQ     |
| hsa-miR-25-3p  | RBFOX2   |
| hsa-miR-25-3p  | EIF4G2   |
| hsa-miR-25-3p  | C5orf24  |
| hsa-miR-25-3p  | NSMAF    |
| hsa-miR-25-3p  | DDX3X    |
| hsa-miR-25-3p  | BCL2L11  |
| hsa-miR-28-5p  | TEX261   |
| hsa-miR-28-5p  | N4BP1    |
| hsa-miR-296-5p | FGFR1    |
| hsa-miR-367-3p | RAB23    |
| hsa-miR-367-3p | TEF      |
| hsa-miR-367-3p | SLC25A32 |
| hsa-miR-367-3p | YIPF4    |
| hsa-miR-367-3p | SLX4     |
| hsa-miR-367-3p | PDZD8    |
| hsa-miR-367-3p | NF2      |
| hsa-miR-367-3p | SPRYD4   |
| hsa-miR-367-3p | PLEKHA1  |
| hsa-miR-367-3p | ERGIC2   |
| hsa-miR-367-3p | MOAP1    |
| hsa-miR-367-3p | PER2     |
| hsa-miR-367-3p | ELOA     |
| hsa-miR-367-3p | KIF5B    |
| hsa-miR-367-3p | GOLGA3   |
| hsa-miR-490-3p | SMARCD1  |
| hsa-miR-490-3p | TGFBR1   |
| hsa-miR-497-5p | N4BP1    |
| hsa-miR-497-5p | NAA25    |
| hsa-miR-497-5p | LAMC1    |
| hsa-miR-497-5p | SHOC2    |
| hsa-miR-497-5p | TBPL1    |

|                |          |
|----------------|----------|
| hsa-miR-497-5p | UBE2V1   |
| hsa-miR-497-5p | CDK6     |
| hsa-miR-497-5p | ACVR2A   |
| hsa-miR-497-5p | ANLN     |
| hsa-miR-497-5p | PHF19    |
| hsa-miR-497-5p | CCND3    |
| hsa-miR-497-5p | FBXL20   |
| hsa-miR-497-5p | CCND1    |
| hsa-miR-497-5p | AMOT     |
| hsa-miR-497-5p | SREK1    |
| hsa-miR-497-5p | MTMR3    |
| hsa-miR-497-5p | NUP50    |
| hsa-miR-497-5p | CACUL1   |
| hsa-miR-497-5p | PIK3R1   |
| hsa-miR-497-5p | CDC25A   |
| hsa-miR-497-5p | RBPJ     |
| hsa-miR-497-5p | AVL9     |
| hsa-miR-497-5p | MAFK     |
| hsa-miR-497-5p | CLSPN    |
| hsa-miR-497-5p | LUZP1    |
| hsa-miR-497-5p | MAP2K1   |
| hsa-miR-497-5p | WNK3     |
| hsa-miR-497-5p | TSC22D2  |
| hsa-miR-497-5p | AGO4     |
| hsa-miR-497-5p | PAG1     |
| hsa-miR-497-5p | RBBP6    |
| hsa-miR-497-5p | TAOK1    |
| hsa-miR-497-5p | DMTF1    |
| hsa-miR-497-5p | CHAC1    |
| hsa-miR-497-5p | SNCG     |
| hsa-miR-497-5p | ARIH1    |
| hsa-miR-497-5p | CAPZA2   |
| hsa-miR-497-5p | SLC2A3   |
| hsa-miR-497-5p | TLL1     |
| hsa-miR-497-5p | CCND2    |
| hsa-miR-497-5p | ELK4     |
| hsa-miR-497-5p | ZNF704   |
| hsa-miR-497-5p | FOXK1    |
| hsa-miR-497-5p | ZBTB34   |
| hsa-miR-497-5p | ATXN7L3B |
| hsa-miR-497-5p | CREBRF   |
| hsa-miR-497-5p | SLC39A9  |
| hsa-miR-497-5p | SEC24A   |
| hsa-miR-9-5p   | MTHFD2   |
| hsa-miR-9-5p   | BCL2L11  |
| hsa-miR-9-5p   | TBPL1    |
| hsa-miR-9-5p   | EDEM3    |
| hsa-miR-9-5p   | ONECUT2  |
| hsa-miR-9-5p   | REST     |
| hsa-miR-9-5p   | PRRX1    |
| hsa-miR-9-5p   | SIRT1    |
| hsa-miR-9-5p   | FOXP1    |
| hsa-miR-9-5p   | ZNF704   |
| hsa-miR-9-5p   | TNFAIP8  |



|              |         |
|--------------|---------|
| hsa-miR-9-5p | SERINC5 |
| hsa-miR-9-5p | MAP7    |

Table S2

| Symbol   | ID   | Name                                                   | Synonyms                                                                   |
|----------|------|--------------------------------------------------------|----------------------------------------------------------------------------|
| AZGP1    | 563  | alpha-2-glycoprotein 1, zinc-binding                   | ZA2G ZAG                                                                   |
| B2M      | 567  | beta-2-microglobulin                                   | IMD43                                                                      |
| CALR     | 811  | calreticulin                                           | CRT HEL-S-99n RO SSA cC1qR                                                 |
| CANX     | 821  | calnexin                                               | CNX IP90 P90                                                               |
| CD1A     | 909  | CD1a molecule                                          | CD1 FCB6 HTA1 R4 T6                                                        |
| CD1B     | 910  | CD1b molecule                                          | CD1 CD1A R1                                                                |
| CD1C     | 911  | CD1c molecule                                          | BDCA1 CD1 CD1A R7                                                          |
| CD1D     | 912  | CD1d molecule                                          | CD1A R3 R3G1                                                               |
| CD1E     | 913  | CD1e molecule                                          | CD1A R2                                                                    |
| CD4      | 920  | CD4 molecule                                           | CD4mut                                                                     |
| CD8A     | 925  | CD8a molecule                                          | CD8 Leu2 p32                                                               |
| CD8B     | 926  | CD8b molecule                                          | CD8B1 LEU2 LY3 LYT3 P37                                                    |
| CD74     | 972  | CD74 molecule                                          | DHLA HLADG III Ia-GAMMA p33                                                |
| CREB1    | 1385 | cAMP responsive element binding protein 1              | CREB CREB-1                                                                |
| CTSB     | 1508 | cathepsin B                                            | APPS CPSB RECEUP                                                           |
| CTSE     | 1510 | cathepsin E                                            | CATE                                                                       |
| CTSL     | 1514 | cathepsin L                                            | CATL CTSL1 MEP                                                             |
| CTSS     | 1520 | cathepsin S                                            | -                                                                          |
| FCER1G   | 2207 | Fc fragment of IgE receptor Ig                         | FCRG                                                                       |
| FCGRT    | 2217 | Fc fragment of IgG receptor and transporter            | FCRN alpha-chain                                                           |
| PDIA3    | 2923 | protein disulfide isomerase family A member 3          | ER60 ERp57 ERp60 ERp61 GRP57 GRP58 HEL-S-269 HEL-S-93n HsT17083 P58 PI-PLC |
| HFE      | 3077 | homeostatic iron regulator                             | HFE1 HH HLA-H MVC7 TFQTL2                                                  |
| HLA-A    | 3105 | major histocompatibility complex, class I, A           | HAAA                                                                       |
| HLA-B    | 3106 | major histocompatibility complex, class I, B           | AS B-4901 HLAB                                                             |
| HLA-C    | 3107 | major histocompatibility complex, class I, C           | D6S204 HLA-JY3 HLAC HLC-C MHC PSORS1                                       |
| HLA-DMA  | 3108 | major histocompatibility complex, class II, DM alpha   | D6S222E DMA HLADM RING6                                                    |
| HLA-DMB  | 3109 | major histocompatibility complex, class II, DM beta    | D6S221E RING7                                                              |
| HLA-DOA  | 3111 | major histocompatibility complex, class II, DO alpha   | HLA-DNA HLA-DZA HLADZ                                                      |
| HLA-DOB  | 3112 | major histocompatibility complex, class II, DO beta    | DOB HLA_DOB                                                                |
| HLA-DPA1 | 3113 | major histocompatibility complex, class II, DP alpha 1 | DP(W3) DP(W4) DPA1 HLA-DP1A HLA-DPB1 HLADP HLASB PLT1                      |
| HLA-DPB1 | 3115 | major histocompatibility complex, class II, DP beta 1  | DPB1 HLA-DP HLA-DP1B HLA-DPB                                               |
| HLA-DQA1 | 3117 | major histocompatibility complex, class II, DQ alpha 1 | CELIAC1 DQ-A1 DQA1 HLA-DQA                                                 |
| HLA-DQA2 | 3118 | major histocompatibility complex, class II, DQ alpha 2 | DC-alpha DX-ALPHA HLA-DCA HLA-DXA HLADQA2                                  |
| HLA-DQB1 | 3119 | major histocompatibility complex, class II, DQ beta 1  | CELIAC1 HLA-DQB IDDM1                                                      |

|          |      |                                                           |                                                                                                          |
|----------|------|-----------------------------------------------------------|----------------------------------------------------------------------------------------------------------|
| HLA-DRA  | 3122 | major histocompatibility complex, class II, DR alpha      | HLA-DRA1                                                                                                 |
| HLA-DRB1 | 3123 | major histocompatibility complex, class II, DR beta 1     | DRB1 HLA-DR1B HLA-DRB SS1                                                                                |
| HLA-DRB3 | 3125 | major histocompatibility complex, class II, DR beta 3     | DRB3 HLA-DPB1 HLA-DR1B HLA-DR3B                                                                          |
| HLA-DRB4 | 3126 | major histocompatibility complex, class II, DR beta 4     | DR4 DRB4 HLA-DR4B HLA-DRB4*                                                                              |
| HLA-DRB5 | 3127 | major histocompatibility complex, class II, DR beta 5     | -                                                                                                        |
| HLA-E    | 3133 | major histocompatibility complex, class I, E              | HLA-6.2 QA1                                                                                              |
| HLA-F    | 3134 | major histocompatibility complex, class I, F              | CDA12 HLA-5.4 HLA-CDA12 HLAF                                                                             |
| HLA-G    | 3135 | major histocompatibility complex, class I, G              | MHC-G                                                                                                    |
| HLA-H    | 3136 | major histocompatibility complex, class I, H (pseudogene) | HLAHP                                                                                                    |
| MR1      | 3140 | major histocompatibility complex, class I-related         | HLALS                                                                                                    |
| HSPA1A   | 3303 | heat shock protein family A (Hsp70) member 1A             | HEL-S-103 HSP70-1 HSP70-1A HSP70-2 HSP70.1 HSP70.2 HSP70I HSP72 HSPA1                                    |
| HSPA1B   | 3304 | heat shock protein family A (Hsp70) member 1B             | HSP70-1 HSP70-1B HSP70-2 HSP70.1 HSP70.2 HSP72 HSPA1 HSX70                                               |
| HSPA1L   | 3305 | heat shock protein family A (Hsp70) member 1 like         | HSP70-1L HSP70-HOM HSP70T hum70t                                                                         |
| HSPA2    | 3306 | heat shock protein family A (Hsp70) member 2              | HSP70-2 HSP70-3                                                                                          |
| HSPA4    | 3308 | heat shock protein family A (Hsp70) member 4              | APG-2 HEL-S-5a HS24/P52 HSPH2 RY hsp70 hsp70RY                                                           |
| HSPA5    | 3309 | heat shock protein family A (Hsp70) member 5              | BIP GRP78 HEL-S-89n MIF2                                                                                 |
| HSPA6    | 3310 | heat shock protein family A (Hsp70) member 6              | HSP70B'                                                                                                  |
| HSPA8    | 3312 | heat shock protein family A (Hsp70) member 8              | HEL-33 HEL-S-72p HSC54 HSC70 HSC71 HSP71 HSP73 HSPA10 LAP-1 LAP1 NIP71                                   |
| HSP90AA1 | 3320 | heat shock protein 90 alpha family class A member 1       | EL52 HEL-S-65p HSP86 HSP89A HSP90A HSP90N HSPC1 HSPCA HSPCAL1 HSPCAL4 HSPN Hsp103 Hsp89 Hsp90 LAP-2 LAP2 |
| HSP90AB1 | 3326 | heat shock protein 90 alpha family class B member 1       | D6S182 HSP84 HSP90B HSPC2 HSPCB                                                                          |
| ICAM1    | 3383 | intercellular adhesion molecule 1                         | BB2 CD54 P3.58                                                                                           |
| IFNA1    | 3439 | interferon alpha 1                                        | IFL IFN IFN-ALPHA IFN-alphaD IFNA13 IFNA@ leIF D                                                         |
| IFNA2    | 3440 | interferon alpha 2                                        | IFN-alpha-2 IFN-alphaA IFNA IFNA2B leIF A                                                                |
| IFNA4    | 3441 | interferon alpha 4                                        | IFN-alpha4a INFA4                                                                                        |
| IFNA5    | 3442 | interferon alpha 5                                        | IFN-alpha-5 IFN-alphaG INA5 INFA5 leIF G                                                                 |
| IFNA6    | 3443 | interferon alpha 6                                        | IFN-alphaK                                                                                               |

|         |       |                                                                                        |                                                                                                    |
|---------|-------|----------------------------------------------------------------------------------------|----------------------------------------------------------------------------------------------------|
| IFNA7   | 3444  | interferon alpha 7                                                                     | IFN-alphaJ IFNA-J                                                                                  |
| IFNA8   | 3445  | interferon alpha 8                                                                     | IFN-alphaB                                                                                         |
| IFNA10  | 3446  | interferon alpha 10                                                                    | IFN-alphaC                                                                                         |
| IFNA13  | 3447  | interferon alpha 13                                                                    | -                                                                                                  |
| IFNA14  | 3448  | interferon alpha 14                                                                    | IFN-alphaH LEIF2H                                                                                  |
| IFNA16  | 3449  | interferon alpha 16                                                                    | IFN-alpha-16 IFN-alphaO                                                                            |
| IFNA17  | 3451  | interferon alpha 17                                                                    | IFN-alphaI IFNA INFA LEIF2C1                                                                       |
| IFNA21  | 3452  | interferon alpha 21                                                                    | IFN-alphaI LeIF F leIF-F                                                                           |
| IFNG    | 3458  | interferon gamma                                                                       | IFG IFI                                                                                            |
| KIR2DL1 | 3802  | killer cell immunoglobulin like receptor, two Ig domains and long cytoplasmic tail 1   | CD158A KIR-K64 KIR221 KIR2DL3 NKAT NKAT-1 NKAT1 p58.1                                              |
| KIR2DL2 | 3803  | killer cell immunoglobulin like receptor, two Ig domains and long cytoplasmic tail 2   | CD158B1 CD158b NKAT-6 NKAT6 p58.2                                                                  |
| KIR2DL3 | 3804  | killer cell immunoglobulin like receptor, two Ig domains and long cytoplasmic tail 3   | CD158B2 CD158b GL183 KIR-023GB KIR-K7b KIR-K7c KIR2DL KIR2DS5 KIRCL23 NKAT NKAT2 NKAT2A NKAT2B p58 |
| KIR2DL4 | 3805  | killer cell immunoglobulin like receptor, two Ig domains and long cytoplasmic tail 4   | CD158D G9P KIR-103AS KIR-2DL4 KIR103 KIR103AS                                                      |
| KIR2DS1 | 3806  | killer cell immunoglobulin like receptor, two Ig domains and short cytoplasmic tail 1  | CD158H CD158a p50.1                                                                                |
| KIR2DS3 | 3808  | killer cell immunoglobulin like receptor, two Ig domains and short cytoplasmic tail 3  | NKAT7                                                                                              |
| KIR2DS4 | 3809  | killer cell immunoglobulin like receptor, two Ig domains and short cytoplasmic tail 4  | CD158I KIR-2DS4 KIR1D KIR412 KKA3 NKAT-8 NKAT8                                                     |
| KIR2DS5 | 3810  | killer cell immunoglobulin like receptor, two Ig domains and short cytoplasmic tail 5  | CD158G NKAT9                                                                                       |
| KIR3DL1 | 3811  | killer cell immunoglobulin like receptor, three Ig domains and long cytoplasmic tail 1 | CD158E1 KIR KIR3DL1/S1 NKAT-3 NKAT3 NKB1 NKB1B                                                     |
| KIR3DL2 | 3812  | killer cell immunoglobulin like receptor, three Ig domains and long cytoplasmic tail 2 | 3DL2 CD158K KIR-3DL2 NKAT-4 NKAT4 NKAT4B p140                                                      |
| KLRC1   | 3821  | killer cell lectin like receptor C1                                                    | CD159A NKG2 NKG2A                                                                                  |
| KLRC2   | 3822  | killer cell lectin like receptor C2                                                    | CD159c NKG2-C NKG2C                                                                                |
| KLRC3   | 3823  | killer cell lectin like receptor C3                                                    | NKG2-E NKG2E                                                                                       |
| KLRD1   | 3824  | killer cell lectin like receptor D1                                                    | CD94                                                                                               |
| LTA     | 4049  | lymphotoxin alpha                                                                      | LT TNFB TNFSF1 TNLG1E                                                                              |
| CIITA   | 4261  | class II major histocompatibility complex transactivator                               | C2TA CIITAIV MHC2TA NLRA                                                                           |
| MICA    | 1E+08 | MHC class I polypeptide-related sequence A                                             | MIC-A PERB11.1                                                                                     |
| MICB    | 4277  | MHC class I polypeptide-related sequence B                                             | PERB11.2                                                                                           |
| NFYA    | 4800  | nuclear transcription factor Y subunit alpha                                           | CBF-A CBF-B HAP2 NF-YA                                                                             |

|         |      |                                              |                                                        |
|---------|------|----------------------------------------------|--------------------------------------------------------|
| NFYB    | 4801 | nuclear transcription factor Y subunit beta  | CBF-A CBF-B HAP3 NF-YB                                 |
| NFYC    | 4802 | nuclear transcription factor Y subunit gamma | CBF-C CBFC H1TF2A HAP5 HSM NF-YC                       |
| LGMN    | 5641 | legumain                                     | AEP LGMN1 PRSC1                                        |
| PSMB8   | 5696 | proteasome 20S subunit beta 8                | ALDD D6S216 D6S216E JMP LMP7 NKJO PRAAS1 PSMB5i RING10 |
| PSMC1   | 5700 | proteasome 26S subunit, ATPase 1             | P26S4 S4 p56                                           |
| PSMC2   | 5701 | proteasome 26S subunit, ATPase 2             | MSS1 Nbla10058 S7                                      |
| PSMC3   | 5702 | proteasome 26S subunit, ATPase 3             | TBP1                                                   |
| PSMC4   | 5704 | proteasome 26S subunit, ATPase 4             | MIP224 RPT3 S6 TBP-7 TBP7                              |
| PSMC5   | 5705 | proteasome 26S subunit, ATPase 5             | S8 SUG-1 SUG1 TBP10 TRIP1 p45 p45/SUG                  |
| PSMC6   | 5706 | proteasome 26S subunit, ATPase 6             | SUG2 p42                                               |
| PSMD1   | 5707 | proteasome 26S subunit, non-ATPase 1         | P112 Rpn2 S1                                           |
| PSMD2   | 5708 | proteasome 26S subunit, non-ATPase 2         | P97 RPN1 S2 TRAP2                                      |
| PSMD3   | 5709 | proteasome 26S subunit, non-ATPase 3         | P58 RPN3 S3 TSTA2                                      |
| PSMD4   | 5710 | proteasome 26S subunit, non-ATPase 4         | AF AF-1 ASF MCB1 Rpn10 S5A pUB-R5                      |
| PSMD5   | 5711 | proteasome 26S subunit, non-ATPase 5         | S5B                                                    |
| PSMD7   | 5713 | proteasome 26S subunit, non-ATPase 7         | MOV34 P40 Rpn8 S12                                     |
| PSMD8   | 5714 | proteasome 26S subunit, non-ATPase 8         | HEL-S-91n HIP6 HYPF Nin1p Rpn12 S14 p31                |
| PSMD10  | 5716 | proteasome 26S subunit, non-ATPase 10        | dJ889N15.2 p28 p28(GANK)                               |
| PSMD11  | 5717 | proteasome 26S subunit, non-ATPase 11        | Rpn6 S9 p44.5                                          |
| PSMD13  | 5719 | proteasome 26S subunit, non-ATPase 13        | HSPC027 Rpn9 S11 p40.5                                 |
| PSME1   | 5720 | proteasome activator subunit 1               | HEL-S-129m IFI5111 PA28A PA28alpha REGalpha            |
| PSME1   | 5720 | proteasome activator subunit 1               | HEL-S-129m IFI5111 PA28A PA28alpha REGalpha            |
| PSME2   | 5721 | proteasome activator subunit 2               | PA28B PA28beta REGbeta                                 |
| PSME2   | 5721 | proteasome activator subunit 2               | PA28B PA28beta REGbeta                                 |
| RELB    | 5971 | RELB proto-oncogene, NF-kB subunit           | I-REL IMD53 IREL REL-B                                 |
| RFX5    | 5993 | regulatory factor X5                         | -                                                      |
| RFXAP   | 5994 | regulatory factor X associated protein       | -                                                      |
| SLC10A2 | 6555 | solute carrier family 10 member 2            | ASBT IBAT ISBT NTCP2 PBAM                              |

|          |        |                                                                                        |                                                             |
|----------|--------|----------------------------------------------------------------------------------------|-------------------------------------------------------------|
| TAP1     | 6890   | transporter 1, ATP binding cassette subfamily B member                                 | ABC17 ABCB2 APT1 D6S114E PSF-1 PSF1 RING4 TAP1*0102N TAP1N  |
| TAP2     | 6891   | transporter 2, ATP binding cassette subfamily B member                                 | ABC18 ABCB3 APT2 D6S217E PSF-2 PSF2 RING11                  |
| TAPBP    | 6892   | TAP binding protein                                                                    | NGS17 TAPA TPN TPSN                                         |
| THBS1    | 7057   | thrombospondin 1                                                                       | THBS THBS-1 TSP TSP-1 TSP1                                  |
| SEM1     | 7979   | SEM1 26S proteasome complex subunit                                                    | C7orf76 DSS1 ECD SHFD1 SHFM1 SHS F1 Shfdg1                  |
| KLRC4    | 8302   | killer cell lectin like receptor C4                                                    | NKG2-F NKG2F                                                |
| AP3B1    | 8546   | adaptor related protein complex 3 subunit beta 1                                       | ADTB3 ADTB3A HPS HPS2 PE                                    |
| RFXANK   | 8625   | regulatory factor X associated ankyrin containing protein                              | ANKRA1 BLS F14150_1 RFX-B                                   |
| PSMD6    | 9861   | proteasome 26S subunit, non-ATPase 6                                                   | Rpn7 S10 SGA-113M p42A p44S10                               |
| PSME3    | 10197  | proteasome activator subunit 3                                                         | HEL-S-283 Ki PA28-gamma PA28G PA28gamma REG-GAMMA           |
| PSMD14   | 10213  | proteasome 26S subunit, non-ATPase 14                                                  | PAD1 POH1 RPN11                                             |
| CLEC4M   | 10332  | C-type lectin domain family 4 member M                                                 | CD209L CD299 DC-SIGN2 DC-SIGNR DCSIGNR HP10347 L-SIGN LSIGN |
| IFI30    | 10437  | IFI30 lysosomal thiol reductase                                                        | GILT IFI-30 IP-30 IP30                                      |
| PROCR    | 10544  | protein C receptor                                                                     | CCCA CCD41 EPCR                                             |
| ADRM1    | 11047  | adhesion regulating molecule 1                                                         | ARM-1 ARM1 GP110                                            |
| ECPAS    | 23392  | Ecm29 proteasome adaptor and scaffold                                                  | ECM29 KIAA0368                                              |
| TRPC4AP  | 26133  | transient receptor potential cation channel subfamily C member 4 associated protein    | C20orf188 PPP1R158 TRRP4AP TRUSS                            |
| CD209    | 30835  | CD209 molecule                                                                         | CDSIGN CLEC4L DC-SIGN DC-SIGN1                              |
| UBXN1    | 51035  | UBX domain protein 1                                                                   | 2B28 SAKS1 UBXD10                                           |
| ERAP1    | 51752  | endoplasmic reticulum aminopeptidase 1                                                 | A-LAP ALAP APPILS ARTS-1 ARTS1 ERAAP ERAAP1 PILS-AP PILSAP  |
| TAPBPL   | 55080  | TAP binding protein like                                                               | TAPBP-R TAPBPR                                              |
| KIR2DL5A | 57292  | killer cell immunoglobulin like receptor, two Ig domains and long cytoplasmic tail 5A  | CD158F KIR2DL5 KIR2DL5.1 KIR2DL5.3                          |
| ERAP2    | 64167  | endoplasmic reticulum aminopeptidase 2                                                 | L-RAP LRAP                                                  |
| ULBP3    | 79465  | UL16 binding protein 3                                                                 | N2DL-3 NKG2DL3 RAET1N                                       |
| ULBP2    | 80328  | UL16 binding protein 2                                                                 | ALCAN-alpha N2DL2 NKG2DL2 RAET1H RAET1 L                    |
| ULBP1    | 80329  | UL16 binding protein 1                                                                 | N2DL-1 NKG2DL1 RAET1I                                       |
| KIR3DL3  | 115653 | killer cell immunoglobulin like receptor, three Ig domains and long cytoplasmic tail 3 | CD158Z KIR3DL7 KIR44 KIRC1                                  |
| RAET1E   | 135250 | retinoic acid early transcript 1E                                                      | LETAL N2DL-4 NKG2DL4 RAET1E2 RL-4 ULBP4 bA350J20.7          |
| RAET1L   | 154064 | retinoic acid early transcript 1L                                                      | ULBP6                                                       |

|          |        |                                                    |                                                                                                           |
|----------|--------|----------------------------------------------------|-----------------------------------------------------------------------------------------------------------|
| UBR1     | 197131 | ubiquitin protein ligase E3 component n-recognin 1 | JBS                                                                                                       |
| RAET1G   | 353091 | retinoic acid early transcript 1G                  | ULBP5                                                                                                     |
| PDIA2    | 64714  | protein disulfide isomerase family A member 2      | PDA2 PDI PDIP PDIR                                                                                        |
| HAMP     | 57817  | hepcidin antimicrobial peptide                     | HEPC HFE2B LEAP1 PLTR                                                                                     |
| PI3      | 5266   | peptidase inhibitor 3                              | ESI SKALP WAP3 WFDC14 cementoin                                                                           |
| CAMP     | 820    | cathelicidin antimicrobial peptide                 | CAP-18 CAP18 CRAMP FALL-39 FALL39 HSD26 LL37                                                              |
| DEFB4A   | 1673   | defensin beta 4A                                   | BD-2 DEFB-2 DEFB102 DEFB2 DEFB4 HBD-2 SAP1                                                                |
| PPBP     | 5473   | pro-platelet basic protein                         | B-TG1 Beta-TG CTAP-III CTAP3 CTAPIII CXCL7 LA-PF4 LDGF MDGF NAP-2 PBP SCYB7 TC1 TC2 TGB TGB1 THBGB THBGB1 |
| REG3G    | 130120 | regenerating family member 3 gamma                 | LPPM429 PAP IB PAP-1B PAP1B PAPIB REG III REG-III UNQ429                                                  |
| CXCL14   | 9547   | C-X-C motif chemokine ligand 14                    | BMAC BRAK KEC KS1 MIP-2g MIP2G NJAC SCYB14                                                                |
| CXCL16   | 58191  | C-X-C motif chemokine ligand 16                    | CXCLG16 SR-PSOX SRPSOX                                                                                    |
| SLPI     | 6590   | secretory leukocyte peptidase inhibitor            | ALK1 ALP BLPI HUSI HUSI-I MPI WAP4 WFDC4                                                                  |
| CXCL8    | 3576   | C-X-C motif chemokine ligand 8                     | GCP-1 GCP1 IL8 LECT LUCT LYNAP MDNCF MONAP NAF NAP-1 NAP1 SCYB8                                           |
| CXCL10   | 3627   | C-X-C motif chemokine ligand 10                    | C7 IFI10 INP10 IP-10 SCYB10 crg-2 gIP-10 mob-1                                                            |
| CXCL9    | 4283   | C-X-C motif chemokine ligand 9                     | CMK Humig MIG SCYB9 crg-10                                                                                |
| CXCL5    | 6374   | C-X-C motif chemokine ligand 5                     | ENA-78 SCYB5                                                                                              |
| CXCL11   | 6373   | C-X-C motif chemokine ligand 11                    | H174 I-TAC IP-9 IP9 SCYB11 SCYB9B b-R1                                                                    |
| CXCL6    | 6372   | C-X-C motif chemokine ligand 6                     | CKA-3 GCP-2 GCP2 SCYB6                                                                                    |
| CXCL1    | 2919   | C-X-C motif chemokine ligand 1                     | FSP GRO1 GROa MGSA MGSA-a NAP-3 SCYB1                                                                     |
| CXCL12   | 6387   | C-X-C motif chemokine ligand 12                    | IRH PBSF SCYB12 SDF1 TLSF TPAR1                                                                           |
| CXCL13   | 10563  | C-X-C motif chemokine ligand 13                    | ANGIE ANGIE2 BCA-1 BCA1 BLC BLR1L SCYB13                                                                  |
| CXCL2    | 2920   | C-X-C motif chemokine ligand 2                     | CINC-2a GRO2 GROb MGSA-b MIP-2a MIP2 MIP2A SCYB2                                                          |
| PF4      | 5196   | platelet factor 4                                  | CXCL4 PF-4 SCYB4                                                                                          |
| XCL1     | 6375   | X-C motif chemokine ligand 1                       | ATAC LPTN LTN SCM-1 SCM-1a SCM1 SCM1A SCYC1                                                               |
| CXCL3    | 2921   | C-X-C motif chemokine ligand 3                     | CINC-2b GRO3 GROg MIP-2b MIP2B SCYB3                                                                      |
| DEFB103B | 55894  | defensin beta 103B                                 | BD-3 DEFB-3 DEFB103 DEFB3 HBD-3 HBD3 HBP-3 HBP3                                                           |
| CCL13    | 6357   | C-C motif chemokine ligand 13                      | CKb10 MCP-4 NCC-1 NCC1 SCYA13 SCYL1                                                                       |
| CCL1     | 6346   | C-C motif chemokine ligand 1                       | I-309 P500 SCYA1 SISe TCA3                                                                                |
| DEFB1    | 1672   | defensin beta 1                                    | BD1 DEFB-1 DEFB101 HBD1                                                                                   |
| CCL8     | 6355   | C-C motif chemokine ligand 8                       | HC14 MCP-2 MCP2 SCYA10 SCYA8                                                                              |
| ELANE    | 1991   | elastase, neutrophil expressed                     | ELA2 GE HLE HNE NE PMN-E SCN1                                                                             |

|          |        |                                               |                                                          |
|----------|--------|-----------------------------------------------|----------------------------------------------------------|
| DEFB103A | 414325 | defensin beta 103A                            | BD-3 DEFB-3 DEFB103 DEFB3 HBD3 HBP-3 HBP3                |
| DEFA3    | 1668   | defensin alpha 3                              | DEF3 HNP-3 HNP3 HP-3 HP3                                 |
| DEFA1    | 1667   | defensin alpha 1                              | DEF1 DEFA2 HNP-1 HP-1 HP1 MRS                            |
| TMSB10   | 9168   | thymosin beta 10                              | MIG12 TB10                                               |
| DEFA6    | 1671   | defensin alpha 6                              | DEF6 HD-6                                                |
| DEFA5    | 1670   | defensin alpha 5                              | DEF5 HD-5                                                |
| DEFA4    | 1669   | defensin alpha 4                              | DEF4 HNP-4 HP-4 HP4                                      |
| LCN2     | 3934   | lipocalin 2                                   | 24p3 MSFI NGAL p25                                       |
| LCN1     | 3933   | lipocalin 1                                   | PMFA TLC TP VEGP                                         |
| COLEC10  | 10584  | collectin subfamily member 10                 | 3MC3 CL-34 CLL1                                          |
| BPI      | 671    | bactericidal permeability increasing protein  | BPIFD1 rBPI                                              |
| S100A9   | 6280   | S100 calcium binding protein A9               | 60B8AG CAGB CFAG CGLB L1AG LIAG MAC387 MIF MRP14 NIF P14 |
| S100A8   | 6279   | S100 calcium binding protein A8               | 60B8AG CAGA CFAG CGLA CP-10 L1Ag MA387 MIF MRP8 NIF P8   |
| DCD      | 117159 | dermcidin                                     | AIDD DCD-1 DSEP HCAP PIF                                 |
| LCN6     | 158062 | lipocalin 6                                   | LCN5 UNQ643 hLcn5                                        |
| S100A12  | 6283   | S100 calcium binding protein A12              | CAAF1 CAGC CGRP ENRAGE MRP-6 MRP6 p6                     |
| HTN3     | 3347   | histatin 3                                    | HIS2 HTN2 HTN5 PB                                        |
| LCN8     | 138307 | lipocalin 8                                   | EP17 LCN5                                                |
| DEFA1B   | 728358 | defensin alpha 1B                             | HNP-1 HP-1 HP1                                           |
| CCR10    | 2826   | C-C motif chemokine receptor 10               | GPR2                                                     |
| CELA1    | 1990   | chymotrypsin like elastase 1                  | ELA1                                                     |
| DEFB106A | 245909 | defensin beta 106A                            | BD-6 DEFB-6 DEFB106                                      |
| PENK     | 5179   | proenkephalin                                 | PE PENK-A                                                |
| BPIFC    | 254240 | BPI fold containing family C                  | BPIL2                                                    |
| MMP12    | 4321   | matrix metalloproteinase 12                   | HME ME MME MMP-12                                        |
| BPIFB6   | 128859 | BPI fold containing family B member 6         | BPIL3 LPLUNC6                                            |
| LEAP2    | 116842 | liver enriched antimicrobial peptide 2        | LEAP-2                                                   |
| SFTPD    | 6441   | surfactant protein D                          | COLEC7 PSP-D SFTP4 SP-D                                  |
| LCN9     | 392399 | lipocalin 9                                   | HEL129                                                   |
| BPIFB2   | 80341  | BPI fold containing family B member 2         | BPIL1 C20orf184 LPLUNC2 RYSR dJ726C3.2                   |
| PTGDS    | 5730   | prostaglandin D2 synthase                     | L-PGDS LPGDS PDS PGD2 PGDS PGDS2                         |
| TMSB4X   | 7114   | thymosin beta 4 X-linked                      | FX PTMB4 TB4X TMSB4                                      |
| PGLYRP1  | 8993   | peptidoglycan recognition protein 1           | PGLYRP PGRP PGRP-S PGRPS TAG7 TNFSF3L                    |
| ZC3HAV1  | 56829  | zinc finger CCCH-type containing, antiviral 1 | ARTD13 FLB6421 PARP13 ZAP ZC3H2 ZC3HDC2                  |
| TMSB15A  | 11013  | thymosin beta 15a                             | TMSB15 TMSB15B TMSL8 TMSNB Tb15 TbNB                     |
| S100B    | 6285   | S100 calcium binding protein B                | NEF S100 S100-B S100beta                                 |
| S100A13  | 6284   | S100 calcium binding protein                  | -                                                        |
| S100A6   | 6277   | S100 calcium binding protein A6               | 2A9 5B10 CABP CACY PRA S10A6                             |
| DEFB119  | 245932 | defensin beta 119                             | DEFB-19 DEFB-20 DEFB120 DEFB20 ESC42-RELA ESC42-RELB     |



|          |        |                                             |                                                                           |
|----------|--------|---------------------------------------------|---------------------------------------------------------------------------|
| DEFB107A | 245910 | defensin beta 107A                          | BD-7 DEFB-7 DEFB107                                                       |
| DEFB105A | 245908 | defensin beta 105A                          | BD-5 DEFB-5 DEFB105                                                       |
| SERPIND1 | 3053   | serpin family D member 1                    | D22S673 HC2 HCF2 HCII HLS2 LS2 THP<br>H10                                 |
| DEFB129  | 140881 | defensin beta 129                           | C20orf87 DEFB-<br>29 DEFB29 bA530N10.3 hBD-29                             |
| DEFB127  | 140850 | defensin beta 127                           | C20orf73 DEF-27 DEFB-<br>27 DEFB27 bA530N10.2 hBD-27                      |
| S100P    | 6286   | S100 calcium binding protein P              | MIG9                                                                      |
| S100A7   | 6278   | S100 calcium binding protein A7             | PSOR1 S100A7c                                                             |
| DEFB104A | 140596 | defensin beta 104A                          | BD-4 DEFB-4 DEFB104 DEFB4 hBD-4                                           |
| DEFB126  | 81623  | defensin beta 126                           | C20orf8 DEFB-<br>26 DEFB26 HBD26 bA530N10.1 hBD-26                        |
| DEFB106B | 503841 | defensin beta 106B                          | BD-6 DEFB-6                                                               |
| DEFB104B | 503618 | defensin beta 104B                          | BD-4 DEFB-4 hBD-4                                                         |
| DEFB107B | 503614 | defensin beta 107B                          | HsT21816                                                                  |
| PGLYRP3  | 114771 | peptidoglycan recognition protein<br>3      | PGLYRP1alpha PGRP-Ialpha PGRPIA                                           |
| PGLYRP2  | 114770 | peptidoglycan recognition protein<br>2      | HMFT0141 PGLYRPL PGRP-<br>L PGRPL TAGL-like tagL tagL-alpha tagL-<br>beta |
| S100A10  | 6281   | S100 calcium binding protein<br>A10         | 42C ANX2L ANX2LG CAL1L CLP11 Ca[1<br>] GP11 P11 p10                       |
| S100A2   | 6273   | S100 calcium binding protein A2             | CAN19 S100L                                                               |
| DEFB125  | 245938 | defensin beta 125                           | DEFB-25                                                                   |
| DEFB123  | 245936 | defensin beta 123                           | DEFB-23 DEFB23 ESC42-RELD                                                 |
| DEFB105B | 504180 | defensin beta 105B                          | BD-5 DEFB-5                                                               |
| DEFB132  | 400830 | defensin beta 132                           | BD-32 DEFB-32 DEFB32 HEL-<br>75 KFL827 UNQ827                             |
| BPIFB3   | 359710 | BPI fold containing family B<br>member 3    | C20orf185 LPLUNC3 RYA3                                                    |
| LCN12    | 286256 | lipocalin 12                                | -                                                                         |
| PGLYRP4  | 57115  | peptidoglycan recognition protein<br>4      | PGLYRPIbeta PGRP-<br>Ibeta PGRPIB SBBI67                                  |
| S100A11  | 6282   | S100 calcium binding protein                | HEL-S-43 MLN70 S100C                                                      |
| S100A5   | 6276   | S100 calcium binding protein A5             | S100D                                                                     |
| S100A3   | 6274   | S100 calcium binding protein A3             | S100E                                                                     |
| S100A1   | 6271   | S100 calcium binding protein A1             | S100 S100-alpha S100A                                                     |
| DEFB128  | 245939 | defensin beta 128                           | DEFB-28 DEFB28 hBD-28                                                     |
| DEFB108B | 245911 | defensin beta 108B                          | DEFB-8 hBD-8                                                              |
| HTN1     | 3346   | histatin 1                                  | HIS1                                                                      |
| LMBR1L   | 55716  | limb development membrane<br>protein 1 like | LIMR                                                                      |
| S100A7A  | 338324 | S100 calcium binding protein<br>A7A         | NICE-<br>2 NICE2 S100A15 S100A7L1 S100A7f                                 |
| DEFB118  | 117285 | defensin beta 118                           | C20orf63 DEFB-18 ESC42 ESP13.6                                            |
| COLEC12  | 81035  | collectin subfamily member 12               | CLP1 NSR2 SCARA4 SRCL                                                     |
| TMSB4Y   | 9087   | thymosin beta 4 Y-linked                    | TB4Y                                                                      |
| DEFB131A | 644414 | defensin beta 131A                          | DEFB-31 DEFB131                                                           |
| DEFB134  | 613211 | defensin beta 134                           | -                                                                         |
| DEFB130A | 245940 | defensin beta 130A                          | DEFB-30 DEFB130 DEFB130L DEFB30                                           |
| DEFB124  | 245937 | defensin beta 124                           | DEFB-24                                                                   |
| DEFB121  | 245934 | defensin beta 121                           | DEFB21 ESC42RELC                                                          |
| DEFB116  | 245930 | defensin beta 116                           | DEFB-16                                                                   |

|          |        |                                                                               |                                              |
|----------|--------|-------------------------------------------------------------------------------|----------------------------------------------|
| DEFB115  | 245929 | defensin beta 115                                                             | DEFB-15                                      |
| DEFB114  | 245928 | defensin beta 114                                                             | DEFB-14 DEFB14                               |
| DEFB113  | 245927 | defensin beta 113                                                             | DEFB-13                                      |
| DEFB112  | 245915 | defensin beta 112                                                             | DEFB-12                                      |
| DEFB110  | 245913 | defensin beta 110                                                             | DEFB-10 DEFB-11 DEFB111                      |
| TMSB15B  | 286527 | thymosin beta 15B                                                             | TMSB15A TMSL8 TMSNB Tbeta15b                 |
| DEFB133  | 403339 | defensin beta 133                                                             | -                                            |
| S100Z    | 170591 | S100 calcium binding protein Z                                                | Gm625 S100-zeta                              |
| MAVS     | 57506  | mitochondrial antiviral signaling protein                                     | CARDIF IPS-1 IPS1 VISA                       |
| TMSB4XP8 | 7117   | TMSB4X pseudogene 8                                                           | TMSL3                                        |
| S100A14  | 57402  | S100 calcium binding protein                                                  | BCMP84 S100A15                               |
| LCN10    | 414332 | lipocalin 10                                                                  | -                                            |
| S100A16  | 140576 | S100 calcium binding protein                                                  | AAG13 DT1P1A7 S100F                          |
| DEFB136  | 613210 | defensin beta 136                                                             | DEFB137                                      |
| DEFB135  | 613209 | defensin beta 135                                                             | DEFB136                                      |
| DEFB117  | 245931 | defensin beta 117 (pseudogene)                                                | DEFB-17                                      |
| DEFB110  | 245913 | defensin beta 110                                                             | DEFB-10 DEFB-11 DEFB111                      |
| ZC3HAV1L | 92092  | zinc finger CCCH-type containing, antiviral 1 like                            | C7orf39                                      |
| S100A7L2 | 645922 | S100 calcium binding protein A7 like 2                                        | S100a7b                                      |
| MBL3P    | 50639  | mannose-binding lectin family member 3, pseudogene                            | COLEC2 MBL                                   |
| DEFB4B   | 1E+08  | defensin beta 4B                                                              | DEFB4P                                       |
| BPIFB4   | 149954 | BPI fold containing family B member 4                                         | C20orf186 LPLUNC4 RY2G5 dJ726C3.5            |
| IFNAR1   | 3454   | interferon alpha and beta receptor subunit 1                                  | AVP IFN-alpha-REC IFNAR IFNBR IFRC           |
| AZU1     | 566    | azurocidin 1                                                                  | AZAMP AZU CAP37 HBP HUMAZUR NAZC hHBP        |
| DEFB131B | 1E+08  | defensin beta 131B                                                            | -                                            |
| DEFA1A3  | 613253 | defensin alpha 1 and alpha 3, variable copy number locus                      | DEFA1 DEFA3 DEFT1P                           |
| LCN1P1   | 286310 | lipocalin 1 pseudogene 1                                                      | LCN1L1 bA430N14.2                            |
| S100G    | 795    | S100 calcium binding protein G                                                | CABP CABP1 CABP9K CALB3                      |
| DEFA7P   | 724067 | defensin alpha 7, pseudogene                                                  | DEFA7                                        |
| DEFB130B | 1E+08  | defensin beta 130B                                                            | -                                            |
| DEFB108F | 1E+08  | defensin beta 108F                                                            | DEFB108P5                                    |
| DEFB131C | 1E+08  | defensin beta 131C                                                            | -                                            |
| TCHHL1   | 126637 | trichohyalin like 1                                                           | S100A17 THHL1                                |
| TINAGL1  | 64129  | tubulointerstitial nephritis antigen like 1                                   | ARG1 LCN7 LIECG3 TINAGRP                     |
| IFNGR1   | 3459   | interferon gamma receptor 1                                                   | CD119 IFNGR IMD27A IMD27B                    |
| SLC22A17 | 51310  | solute carrier family 22 member 17                                            | 24p3R BOCT BOIT NGALR NGALR2 NGALR3 hBOIT    |
| WFIKKN1  | 117166 | WAP, follistatin/kazal, immunoglobulin, kunitz and netrin domain containing 1 | C16orf12 RJD2 WFDC20A WFIKKN                 |
| WFDC2    | 10406  | WAP four-disulfide core domain                                                | EDDM4 HE4 WAP5 dJ461P17.6                    |
| IL6      | 3569   | interleukin 6                                                                 | BSF-2 BSF2 CDF HGF HSF IFN-beta-2 IFNB2 IL-6 |
| UMODL1   | 89766  | uromodulin like 1                                                             | -                                            |

|          |        |                                                           |                                                                                                           |
|----------|--------|-----------------------------------------------------------|-----------------------------------------------------------------------------------------------------------|
| TGFB1    | 7040   | transforming growth factor beta 1                         | CED DPD1 IBDIMDE LAP TGF-beta1 TGFB TGFbeta                                                               |
| PF4V1    | 5197   | platelet factor 4 variant 1                               | CXCL4L1 CXCL4V1 PF4-ALT PF4A SCYB4V1                                                                      |
| MMP9     | 4318   | matrix metalloproteinase 9                                | CLG4B GELB MANDP2 MMP-9                                                                                   |
| ANOS1    | 3730   | anosmin 1                                                 | ADMLX HH1 HHA KAL KAL1 KALIG-1 KMS WFDC19                                                                 |
| TLR4     | 7099   | toll like receptor 4                                      | ARMD10 CD284 TLR-4 TOLL                                                                                   |
| IFNG     | 3458   | interferon gamma                                          | IFG IFI                                                                                                   |
| SPAG11B  | 10407  | sperm associated antigen 11B                              | EDDM2B EP2 EP2C EP2D HE2 HE2C SPAG11 SPAG11A                                                              |
| A2M      | 2      | alpha-2-macroglobulin                                     | A2MD CPAMD5 FWP007 S863-7                                                                                 |
| CTSL     | 1514   | cathepsin L                                               | CATL CTSL1 MEP                                                                                            |
| NFKB1    | 4790   | nuclear factor kappa B subunit 1                          | CVID12 EBP-1 KBF1 NF-kB NF-kB1 NF-kappa-B1 NF-kappaB NF-kappabeta NFKB-p105 NFKB-p50 NFkappaB             |
| APOBEC3G | 60489  | apolipoprotein B mRNA editing enzyme catalytic subunit 3G | A3G ARCD ARP-9 ARP9 CEM-15 CEM15 MDS019 bK150C2.7 dJ494G10.1                                              |
| FABP6    | 2172   | fatty acid binding protein 6                              | I-15P I-BABP I-BALB I-BAP ILBP ILBP3 ILLBP                                                                |
| NOD2     | 64127  | nucleotide binding oligomerization domain containing 2    | ACUG BLAU BLAUS CARD15 CD CLR16.3 IBD1 NLRC2 NOD2B PSORAS1 YAOS                                           |
| MBL2     | 4153   | mannose binding lectin 2                                  | COLEC1 HSMBPC MBL MBL2D MBP MBP-C MBP1 MBPD                                                               |
| SFTPA1   | 653509 | surfactant protein A1                                     | COLEC4 PSAP PSP-A PSPA SFTP1 SFTPA1B SP-A SP-A1 SP-A1 beta SP-A1 delta SP-A1 epsilon SP-A1 gamma SPA SPA1 |
| RBP1     | 5947   | retinol binding protein 1                                 | CRABP-I CRBP CRBP1 CRBPI RBPC                                                                             |
| TLR2     | 7097   | toll like receptor 2                                      | CD282 TIL4                                                                                                |
| SLC40A1  | 30061  | solute carrier family 40 member 1                         | FPN1 HFE4 IREG1 MST079 MSTP079 MT1P1 SLC11A3                                                              |
| PLAU     | 5328   | plasminogen activator, urokinase                          | ATF BDPLT5 QPD UPA URK u-PA                                                                               |
| IL1B     | 3553   | interleukin 1 beta                                        | IL-1 IL1-BETA IL1F2 IL1beta                                                                               |
| PAEP     | 5047   | progesterone associated endometrial protein               | GD GdA GdF GdS PAEG PEP PP14 ZIF-1                                                                        |
| HJV      | 148738 | hemojuvelin BMP co-receptor                               | HFE2 HFE2A JH RGMC                                                                                        |
| MUC5AC   | 4586   | mucin 5AC, oligomeric mucus/gel-forming                   | MUC5 TBM IeB mucin                                                                                        |
| CTSS     | 1520   | cathepsin S                                               | -                                                                                                         |
| OBP2A    | 29991  | odorant binding protein 2A                                | LCN13 OBP OBP2C OBPIIa hOBPIIa                                                                            |
| PLTP     | 5360   | phospholipid transfer protein                             | BPIFE HDLQ9                                                                                               |
| MX1      | 4599   | MX dynamin like GTPase 1                                  | IFI-78K IFI78 MX MxA IncMX1-215                                                                           |
| DDX58    | 23586  | DEXD/H-box helicase 58                                    | RIG-I RIG1 RIGI RLR-1 SGMRT2                                                                              |
| IFNL1    | 282618 | interferon lambda 1                                       | IL-29 IL29                                                                                                |
| IRF3     | 3661   | interferon regulatory factor 3                            | IIE7                                                                                                      |
| SFTPA2   | 729238 | surfactant protein A2                                     | COLEC5 PSAP PSP-A PSPA SFTP1 SFTPA2B SP-2A SP-A SPA2 SPAI                                                 |
| LPA      | 4018   | lipoprotein(a)                                            | AK38 APOA LP                                                                                              |
| LBP      | 3929   | lipopolysaccharide binding                                | BPIFD2                                                                                                    |

|         |        |                                          |                                                                                                           |
|---------|--------|------------------------------------------|-----------------------------------------------------------------------------------------------------------|
| RBP4    | 5950   | retinol binding protein 4                | MCOPCB10 RDCCAS                                                                                           |
| SFTPA1  | 653509 | surfactant protein A1                    | COLEC4 PSAP PSP-A PSPA SFTP1 SFTPA1B SP-A SP-A1 SP-A1 beta SP-A1 delta SP-A1 epsilon SP-A1 gamma SPA SPA1 |
| NOX4    | 50507  | NADPH oxidase 4                          | KOX KOX-1 RENOX                                                                                           |
| LTF     | 4057   | lactotransferrin                         | GIG12 HEL110 HLF2 LF                                                                                      |
| IFNB1   | 3456   | interferon beta 1                        | IFB IFF IFN-beta IFNB                                                                                     |
| RBP5    | 83758  | retinol binding protein 5                | CRBP-III CRBP3 CRBP3III HRBPiso                                                                           |
| FABP7   | 2173   | fatty acid binding protein 7             | B-FABP BLBP FABPB MRG                                                                                     |
| FABP5   | 2171   | fatty acid binding protein 5             | E-FABP EFABP KFABP PA-FABP PAFABP                                                                         |
| FABP3   | 2170   | fatty acid binding protein 3             | FABP11 H-FABP M-FABP MDG O-FABP                                                                           |
| FABP2   | 2169   | fatty acid binding protein 2             | FABPI I-FABP                                                                                              |
| FABP4   | 2167   | fatty acid binding protein 4             | A-FABP AFABP ALBP HEL-S-104 aP2                                                                           |
| R3HDML  | 140902 | R3H domain containing like               | dJ881L22.3                                                                                                |
| BPIFA3  | 128861 | BPI fold containing family A member 3    | C20orf71 SPLUNC3                                                                                          |
| BPIFB1  | 92747  | BPI fold containing family B member 1    | C20orf114 LPLUNC1                                                                                         |
| OASL    | 8638   | 2'-5'-oligoadenylate synthetase like     | OASL1 OASLd TRIP-14 TRIP14 p59 OASL p59-OASL p59OASL                                                      |
| CRABP2  | 1382   | cellular retinoic acid binding protein 2 | CRABP-II RBP6                                                                                             |
| CRABP1  | 1381   | cellular retinoic acid binding protein 1 | CRABP CRABP-I CRABPI RBP5                                                                                 |
| RBP7    | 116362 | retinol binding protein 7                | CRABP4 CRBP4 CRBP4IV                                                                                      |
| DUOX1   | 53905  | dual oxidase 1                           | LNOX1 NOXE1 THOX1                                                                                         |
| OBP2B   | 29989  | odorant binding protein 2B               | LCN14 OBPIIb                                                                                              |
| RBP2    | 5948   | retinol binding protein 2                | CRABP-II CRBP2 CRBP2III RBPC2                                                                             |
| LCN15   | 389812 | lipocalin 15                             | PRO6093 UNQ2541                                                                                           |
| CETP    | 1071   | cholesteryl ester transfer protein       | BPIFF HDLCQ10                                                                                             |
| FABP12  | 646486 | fatty acid binding protein 12            | -                                                                                                         |
| FABP9   | 646480 | fatty acid binding protein 9             | PERF PERF15 T-FABP TLBP                                                                                   |
| BPIFA1  | 51297  | BPI fold containing family A member 1    | LUNX NASG PLUNC SPLUNC1 SPURT bA49G10.5                                                                   |
| LCNL1   | 401562 | lipocalin like 1                         | -                                                                                                         |
| C8G     | 733    | complement C8 gamma chain                | C8C                                                                                                       |
| SPAG11A | 653423 | sperm associated antigen 11A             | EDDM2A HE2                                                                                                |
| PI15    | 51050  | peptidase inhibitor 15                   | CRISP8 P24TI P25TI                                                                                        |
| NOX1    | 27035  | NADPH oxidase 1                          | GP91-2 MOX1 NOH-1 NOH1                                                                                    |
| PMP2    | 5375   | peripheral myelin protein 2              | CMT1G FABP8 M-FABP MP2 P2                                                                                 |
| APOD    | 347    | apolipoprotein D                         | -                                                                                                         |
| ORM2    | 5005   | orosomucoid 2                            | AGP-B AGP-B' AGP2                                                                                         |
| ORM1    | 5004   | orosomucoid 1                            | AGP-A AGP1 HEL-S-153w ORM                                                                                 |
| TNF     | 7124   | tumor necrosis factor                    | DIF TNF-alpha TNFA TNFSF2 TNLG1F                                                                          |
| CTSG    | 1511   | cathepsin G                              | CATG CG                                                                                                   |
| PRTN3   | 5657   | proteinase 3                             | ACPA AGP7 C-ANCA CANCA MBN MBT NP-4 NP4 P29 PR-3 PR3                                                      |

|          |        |                                                           |                                                                            |
|----------|--------|-----------------------------------------------------------|----------------------------------------------------------------------------|
| MAPK1    | 5594   | mitogen-activated protein kinase 1                        | ERK ERK-2 ERK2 ERT1 MAPK2 P42MAPK PRKM1 PRKM2 p38 p40 p41 p41mapk p42-MAPK |
| PML      | 5371   | PML nuclear body scaffold                                 | MYL PP8675 RNF71 TRIM19                                                    |
| AEN      | 64782  | apoptosis enhancing nuclease                              | ISG20L1 pp12744                                                            |
| CYBB     | 1536   | cytochrome b-245 beta chain                               | AMCBX2 CGD GP91-1 GP91-PHOX GP91PHOX IMD34 NOX2 p91-PHOX                   |
| BPIFA2   | 140683 | BPI fold containing family A member 2                     | C20orf70 PSP SPLUNC2 bA49G10.1                                             |
| ISG20    | 3669   | interferon stimulated exonuclease gene 20                 | CD25 HEM45                                                                 |
| BCL3     | 602    | BCL3 transcription coactivator                            | BCL4 D19S37                                                                |
| ISG20L2  | 81875  | interferon stimulated exonuclease gene 20 like 2          | HSD38                                                                      |
| NOX5     | 79400  | NADPH oxidase 5                                           | -                                                                          |
| NOX3     | 50508  | NADPH oxidase 3                                           | GP91-3 MOX-2                                                               |
| DUOX2    | 50506  | dual oxidase 2                                            | LNOX2 NOXEF2 P138-TOX TDH6 THOX2                                           |
| TLR3     | 7098   | toll like receptor 3                                      | CD283 IAE2                                                                 |
| TFRC     | 7037   | transferrin receptor                                      | CD71 IMD46 T9 TFR TFR1 TR TRFR p90                                         |
| IFIH1    | 64135  | interferon induced with helicase C domain 1               | AGS7 Hlcd IDDM19 MDA-5 MDA5 RLR-2 SGMRT1                                   |
| LRP1     | 4035   | LDL receptor related protein 1                            | A2MR APOER APR CD91 IGFBP-3R IGFBP3R IGFBP3R1 KPA LRP LRP1A TGFR5          |
| TRIM5    | 85363  | tripartite motif containing 5                             | RNF88 TRIM5alpha                                                           |
| IDO1     | 3620   | indoleamine 2,3-dioxygenase 1                             | IDO IDO-1 INDO                                                             |
| GDF15    | 9518   | growth differentiation factor 15                          | GDF-15 MIC-1 MIC1 NAG-1 PDF PLAB PTGFB                                     |
| NEDD4    | 4734   | NEDD4 E3 ubiquitin protein                                | NEDD4-1 RPF1                                                               |
| ADIPOQ   | 9370   | adiponectin, C1Q and collagen domain containing           | ACDC ACRP30 ADIPQTL1 ADPN APM-1 APM1 GBP28                                 |
| STAT3    | 6774   | signal transducer and activator of transcription 3        | ADMIO ADMIO1 APRF HIES                                                     |
| STAT1    | 6772   | signal transducer and activator of transcription 1        | CANDF7 IMD31A IMD31B IMD31C ISGF-3 STAT91                                  |
| IFNL2    | 282616 | interferon lambda 2                                       | IL-28A IL28A                                                               |
| SOCS3    | 9021   | suppressor of cytokine signaling                          | ATOD4 CIS3 Cish3 SOCS-3 SSI-3 SSI3                                         |
| SEMG1    | 6406   | semenogelin 1                                             | CT103 SEMG SGI dJ172H20.2                                                  |
| TNFSF10  | 8743   | TNF superfamily member 10                                 | APO2L Apo-2L CD253 TL2 TNLG6A TRAIL                                        |
| CCL20    | 6364   | C-C motif chemokine ligand 20                             | CKb4 Exodus LARC MIP-3-alpha MIP-3a MIP3A SCYA20 ST38                      |
| SOCS1    | 8651   | suppressor of cytokine signaling 1                        | CIS1 CISH1 JAB SOCS-1 SSI-1 SSI1 TIP-3 TIP3                                |
| RNASEL   | 6041   | ribonuclease L                                            | PRCA1 RNS4                                                                 |
| IRF1     | 3659   | interferon regulatory factor 1                            | IRF-1 MAR                                                                  |
| IL15     | 3600   | interleukin 15                                            | IL-15                                                                      |
| APOBEC3F | 200316 | apolipoprotein B mRNA editing enzyme catalytic subunit 3F | A3F ARP8 BK150C2.4.MRNA KA6                                                |

|         |        |                                                            |                                                                                       |
|---------|--------|------------------------------------------------------------|---------------------------------------------------------------------------------------|
| PLAAT4  | 5920   | phospholipase A and acyltransferase 4                      | HRASLS4 HRSL4 PLA1/2-3 PLAAT-4 RARRES3 RIG1 TIG3                                      |
| CHIT1   | 1118   | chitinase 1                                                | CHI3 CHIT CHITD                                                                       |
| IFNA1   | 3439   | interferon alpha 1                                         | IFL IFN IFN-ALPHA IFN-alphaD IFNA13 IFNA@ leIF D                                      |
| CD40    | 958    | CD40 molecule                                              | Bp50 CDW40 TNFRSF5 p50                                                                |
| TLR7    | 51284  | toll like receptor 7                                       | TLR7-like                                                                             |
| PPIA    | 5478   | peptidylprolyl isomerase A                                 | CYPA CYPH HEL-S-69p                                                                   |
| HFE     | 3077   | homeostatic iron regulator                                 | HFE1 HH HLA-H MVCD7 TFQTL2                                                            |
| ZYX     | 7791   | zyxin                                                      | ESP-2 HED-2                                                                           |
| NLRX1   | 79671  | NLR family member X1                                       | CLR11.3 DLNB26 NOD26 NOD5 NOD9                                                        |
| PGC     | 5225   | progastricin                                               | PEPC PGII                                                                             |
| VEGFA   | 7422   | vascular endothelial growth factor A                       | MVCD1 VEGF VPF                                                                        |
| IKBKE   | 9641   | inhibitor of nuclear factor kappa B kinase subunit epsilon | IKK-E IKK-i IKKE IKKI                                                                 |
| ISG15   | 9636   | ISG15 ubiquitin like modifier                              | G1P2 IFI15 IMD38 IP17 UCRP hUCRP                                                      |
| DHX58   | 79132  | DExH-box helicase 58                                       | D11LGP2 D11Igp2e LGP2 RLR-3                                                           |
| TNFAIP3 | 7128   | TNF alpha induced protein 3                                | A20 AISBL OTUD7C TNFAIP2                                                              |
| TFR2    | 7036   | transferrin receptor 2                                     | HFE3 TFRC2                                                                            |
| FCN2    | 2220   | ficolin 2                                                  | EBP-37 FCNL P35 ficolin-2                                                             |
| MUC4    | 4585   | mucin 4, cell surface associated                           | ASGP HSA276359 MUC-4                                                                  |
| F2R     | 2149   | coagulation factor II thrombin receptor                    | CF2R HTR PAR-1 PAR1 TR                                                                |
| ELN     | 2006   | elastin                                                    | ADCL1 SVAS WBS WS                                                                     |
| IL27    | 246778 | interleukin 27                                             | IL-27 IL-27A IL27A IL27p28 IL30 p28                                                   |
| MAPT    | 4137   | microtubule associated protein tau                         | DDPAC FTDP-17 MAPTL MSTD MTBT1 MTBT2 PPND PPP1R103 TAU                                |
| LYZ     | 4069   | lysozyme                                                   | LYZF1 LZM                                                                             |
| CCL5    | 6352   | C-C motif chemokine ligand 5                               | D17S136E RANTES SCYA5 SIS-delta SISd TCP228 eoCP                                      |
| LEP     | 3952   | leptin                                                     | LEPD OB OBS                                                                           |
| CYLD    | 1540   | CYLD lysine 63 deubiquitinase                              | BRSS CDMT CYLD1 CYLDI EAC MFT MFT1 SBS TEM USPL2                                      |
| KLKB1   | 3818   | kallikrein B1                                              | KLK3 PKK PKKD PPK                                                                     |
| CST4    | 1472   | cystatin S                                                 | -                                                                                     |
| CSRP1   | 1465   | cysteine and glycine rich protein 1                        | CRP CRP1 CSRP CYRP D1S181E HEL-141 HEL-S-286                                          |
| MAPK14  | 1432   | mitogen-activated protein kinase 14                        | CSBP CSBP1 CSBP2 CSPB1 EXIP Mxi2 PRKM14 PRKM15 RK SAPK2A p38 p38A LPHA                |
| JUN     | 3725   | Jun proto-oncogene, AP-1 transcription factor subunit      | AP-1 AP1 c-Jun cJUN p39                                                               |
| ITGAV   | 3685   | integrin subunit alpha V                                   | CD51 MSK8 VNRA VTNR                                                                   |
| IRF5    | 3663   | interferon regulatory factor 5                             | SLEB10                                                                                |
| CCR6    | 1235   | C-C motif chemokine receptor 6                             | BN-1 C-C CKR-6 CC-CKR-6 CCR-6 CD196 CKR-L3 CKRL3 CMKBR6 DCR2 DRY6 GPR29 GPRCY4 STRL22 |
| IL12B   | 3593   | interleukin 12B                                            | CLMF CLMF2 IL-12B IMD28 IMD29 NKSF NKSF2                                              |
| TLR8    | 51311  | toll like receptor 8                                       | CD288                                                                                 |
| GNLY    | 10578  | granulysin                                                 | D2S69E LAG-2 LAG2 NKG5 TLA519                                                         |

|          |        |                                                           |                                                                           |
|----------|--------|-----------------------------------------------------------|---------------------------------------------------------------------------|
| CD81     | 975    | CD81 molecule                                             | CVID6 S5.7 TAPA1 TSPAN28                                                  |
| EIF2AK2  | 5610   | eukaryotic translation initiation factor 2 alpha kinase 2 | EIF2AK1 LEUDEN PKR PPP1R83 PRKR                                           |
| APOM     | 55937  | apolipoprotein M                                          | G3a HSPC336 NG20 apo-M                                                    |
| CACYBP   | 27101  | calcyclin binding protein                                 | GIG5 PNAS-107 S100A6BP SIP                                                |
| NOD1     | 10392  | nucleotide binding oligomerization domain                 | CARD4 CLR7.1 NLRC1                                                        |
| MAPK8    | 5599   | mitogen-activated protein kinase 8                        | JNK JNK-46 JNK1 JNK1A2 JNK21B1/2 PRKM8 SAPK1 SAPK1c                       |
| MAPK3    | 5595   | mitogen-activated protein kinase 3                        | ERK-1 ERK1 ERT2 HS44KDAP HUMKER1A P44ERK1 P44MAPK PRKM3 p44-ERK1 p44-MAPK |
| BST2     | 684    | bone marrow stromal cell antigen 2                        | CD317 TETHERIN                                                            |
| BPHL     | 670    | biphenyl hydrolase like                                   | BPH-RP MCNAA VACVASE                                                      |
| PLA2G2A  | 5320   | phospholipase A2 group IIA                                | MOM1 PLA2 PLA2B PLA2L PLA2S PLAS1 sPLA2                                   |
| GRN      | 2896   | granulin precursor                                        | CLN11 GEP GP88 PCDGF PEPI PGRN                                            |
| NEWENTRY | 192343 | -                                                         | -                                                                         |
| PDGFRA   | 5156   | platelet derived growth factor receptor alpha             | CD140A PDGFR-2 PDGFR2                                                     |
| GNAI1    | 2770   | G protein subunit alpha i1                                | Gi                                                                        |
| WNT5A    | 7474   | Wnt family member 5A                                      | hWNT5A                                                                    |
| FURIN    | 5045   | furin, paired basic amino acid cleaving enzyme            | FUR PACE PCSK3 SPC1                                                       |
| ADAR     | 103    | adenosine deaminase RNA specific                          | ADAR1 AGS6 DRADA DSH DSRAD G1P1 IFI-4 IFI4 K88DSRBP P136                  |
| TYK2     | 7297   | tyrosine kinase 2                                         | IMD35 JTK1                                                                |
| NOS2     | 4843   | nitric oxide synthase 2                                   | HEP-NOS INOS NOS NOS2A                                                    |
| TRAF3    | 7187   | TNF receptor associated factor 3                          | CAP-1 CAP1 CD40bp CRAF1 IIAE5 LAP1 RNF118                                 |
| TPT1     | 7178   | tumor protein, translationally-controlled 1               | HRF TCTP p02 p23                                                          |
| TPM2     | 7169   | tropomyosin 2                                             | AMCD1 DA1 DA2B DA2B4 HEL-S-273 NEM4 TMSB                                  |
| NEO1     | 4756   | neogenin 1                                                | IGDCC2 NGN NTN1R2                                                         |
| AHNAK    | 79026  | AHNAK nucleoprotein                                       | AHNAKRS PM227                                                             |
| TLR1     | 7096   | toll like receptor 1                                      | CD281 TIL TIL. LPRS5 rsc786                                               |
| TK2      | 7084   | thymidine kinase 2                                        | MTDPS2 MTTK PEOB3 SCA31                                                   |
| PRDX2    | 7001   | peroxiredoxin 2                                           | HEL-S-2a NKEF-B NKEFB PRP PRX2 PRXII PTX1 TDPX1 TPX1 TSA                  |
| MX2      | 4600   | MX dynamin like GTPase 2                                  | MXB                                                                       |
| FGF2     | 2247   | fibroblast growth factor 2                                | BFGF FGF-2 FGFB HBGF-2                                                    |
| FGA      | 2243   | fibrinogen alpha chain                                    | Fib2                                                                      |
| TCF7L2   | 6934   | transcription factor 7 like 2                             | TCF-4 TCF4                                                                |
| F2RL1    | 2150   | F2R like trypsin receptor 1                               | GPR11 PAR2                                                                |
| TKFC     | 26007  | triokinase and FMN cyclase                                | DAK NET45 TKFCD                                                           |
| MSR1     | 4481   | macrophage scavenger receptor 1                           | CD204 SCARA1 SR-A SR-AI SR-AII SR-AIII SRA phSR1 phSR2                    |

|            |        |                                                           |                                                                                     |
|------------|--------|-----------------------------------------------------------|-------------------------------------------------------------------------------------|
| NFKBIZ     | 64332  | NFKB inhibitor zeta                                       | IKBZ INAP MAIL                                                                      |
| LMBR1      | 64327  | limb development membrane protein 1                       | ACHP C7orf2 DIF14 LSS PPD2 THYP TP T ZRS                                            |
| EPPIN      | 57119  | epididymal peptidase inhibitor                            | CT71 CT72 SPINLW1 WAP7 WFDC7 dJ 461P17.2                                            |
| SRC        | 6714   | SRC proto-oncogene, non-receptor tyrosine kinase          | ASV SRC1 THC6 c-SRC p60-Src                                                         |
| MPO        | 4353   | myeloperoxidase                                           | -                                                                                   |
| ELAVL1     | 1994   | ELAV like RNA binding protein 1                           | ELAV1 HUR Hua MeIG                                                                  |
| ROBO3      | 64221  | roundabout guidance receptor 3                            | HGPPS HGPPS1 HGPS RBIG1 RIG1                                                        |
| SP1        | 6667   | Sp1 transcription factor                                  | -                                                                                   |
| SOD1       | 6647   | superoxide dismutase 1                                    | ALS ALS1 HEL-S-44 IPOA SOD STAHP hSod1 homodimer                                    |
| PDF        | 64146  | peptide deformylase, mitochondrial                        | -                                                                                   |
| DLL4       | 54567  | delta like canonical Notch ligand                         | AOS6 delta4 hdelta2                                                                 |
| ECD        | 11319  | ecdysoneless cell cycle regulator                         | GCR2 HSGT1 SGT1                                                                     |
| SLC11A1    | 6556   | solute carrier family 11 member 1                         | LSH NRAMP NRAMP1                                                                    |
| DMBT1      | 1755   | deleted in malignant brain tumors 1                       | GP340 SAG SALSA muclin                                                              |
| STING1     | 340061 | stimulator of interferon response cGAMP interactor 1      | ERIS MITA MPYS NET23 SAVI STING S TING-beta TMEM173 hMITA hSTING                    |
| SKIV2L     | 6499   | Ski2 like RNA helicase                                    | 170A DDX13 HLP SKI2 SKI2W SKIV2 SK IV2L1 THES2                                      |
| SEMG2      | 6407   | semenogelin 2                                             | SGII                                                                                |
| LTA        | 4049   | lymphotoxin alpha                                         | LT TNFB TNFSF1 TNLG1E                                                               |
| DES        | 1674   | desmin                                                    | CDCD3 CSM1 CSM2 LGMD1D LGMD1E  LGMD2R                                               |
| DCK        | 1633   | deoxycytidine kinase                                      | -                                                                                   |
| DAXX       | 1616   | death domain associated protein                           | BING2 DAP6 EAP1 SMIM40                                                              |
| TNFRSF10 A | 8797   | TNF receptor superfamily member 10a                       | APO2 CD261 DR4 TRAILR-1 TRAILR1                                                     |
| TNFRSF10 B | 8795   | TNF receptor superfamily member 10b                       | CD262 DR5 KILLER KILLER/DR5 TRAIL- R2 TRAILR2 TRICK2 TRICK2A TRICK2B  TRICKB ZTNFR9 |
| EED        | 8726   | embryonic ectoderm                                        | COGIS HEED WAIT1                                                                    |
| CCL4       | 6351   | C-C motif chemokine ligand 4                              | ACT2 AT744.1 G-26 HC21 LAG- 1 LAG1 MIP-1- beta MIP1B MIP1B1 SCYA2 SCYA4             |
| LIMS1      | 3987   | LIM zinc finger domain containing 1                       | PINCH PINCH-1 PINCH1                                                                |
| LALBA      | 3906   | lactalbumin alpha                                         | LYZG                                                                                |
| APOBEC3H   | 164668 | apolipoprotein B mRNA editing enzyme catalytic subunit 3H | A3H ARP-10 ARP10                                                                    |
| TMPRSS6    | 164656 | transmembrane serine protease                             | IRIDA MT2                                                                           |
| SPINK5     | 11005  | serine peptidase inhibitor Kazal type 5                   | LEKTI LETKI NETS NS VAKTI                                                           |
| MARCO      | 8685   | macrophage receptor with collagenous structure            | SCARA2 SR-A6                                                                        |
| BECN1      | 8678   | beclin 1                                                  | ATG6 VPS30 beclin1                                                                  |
| TNFSF11    | 8600   | TNF superfamily member 11                                 | CD254 ODF OPGL OPTB2 RANKL TNLG 6B TRANCE hRANKL2 sOdf                              |
| KNG1       | 3827   | kininogen 1                                               | BDK BK HMWK KNG                                                                     |
| CSK        | 1445   | C-terminal Src kinase                                     | -                                                                                   |



|          |        |                                                           |                                                          |
|----------|--------|-----------------------------------------------------------|----------------------------------------------------------|
| KLRK1    | 22914  | killer cell lectin like receptor K1                       | CD314 D12S2489E KLR NKG2-D NKG2D                         |
| KCNH2    | 3757   | potassium voltage-gated channel subfamily H member 2      | ERG-1 ERG1 H-ERG HERG HERG1 Kv11.1 LQT2 SQT1             |
| JUND     | 3727   | JunD proto-oncogene, AP-1 transcription factor subunit    | AP-1                                                     |
| JAK1     | 3716   | Janus kinase 1                                            | JAK1A JAK1B JTK3                                         |
| CREB1    | 1385   | cAMP responsive element binding protein 1                 | CREB CREB-1                                              |
| CLDN4    | 1364   | claudin 4                                                 | CPE-R CPER CPETR CPETR1 WBSCR8 hCPE-R                    |
| CCL28    | 56477  | C-C motif chemokine ligand 28                             | CCK1 MEC SCYA28                                          |
| RNASE3   | 6037   | ribonuclease A family member 3                            | ECP RAF1 RNS3                                            |
| RN7SL1   | 6029   | RNA component of signal recognition particle 7SL1         | 7L1a 7SL RN7SL RNSRP1                                    |
| IRF7     | 3665   | interferon regulatory factor 7                            | IMD39 IRF-7 IRF-7H IRF7A IRF7B IRF7C IRF7H               |
| IREB2    | 3658   | iron responsive element binding protein 2                 | ACO3 IRE-BP 2 IRE-BP2 IRP2 IRP2AD NDCAMA                 |
| ILK      | 3611   | integrin linked kinase                                    | HEL-S-28 ILK-1 ILK-2 P59 p59ILK                          |
| IL18     | 3606   | interleukin 18                                            | IGIF IL-18 IL-1g IL1F4                                   |
| IL17A    | 3605   | interleukin 17A                                           | CTLA-8 CTLA8 IL-17 IL-17A IL17                           |
| LTB4R    | 1241   | leukotriene B4 receptor                                   | BLT1 BLTR CMKRL1 GPR16 LTB4R1 LTBR1 P2RY7 P2Y7           |
| APOBEC3A | 200315 | apolipoprotein B mRNA editing enzyme catalytic subunit 3A | A3A ARP3 PHRBN bK150C2.1                                 |
| MASP2    | 10747  | mannan binding lectin serine peptidase 2                  | MAP19 MASP-2 MASP1P1 sMAP                                |
| TRIM27   | 5987   | tripartite motif containing 27                            | RFP RNF76                                                |
| RELA     | 5970   | RELA proto-oncogene, NF-kB subunit                        | CMCU NFKB3 p65                                           |
| IL7R     | 3575   | interleukin 7 receptor                                    | CD127 CDW127 IL-7R-alpha IL7RA ILRA                      |
| IL1A     | 3552   | interleukin 1 alpha                                       | IL-1 alpha IL-1A IL1 IL1-ALPHA IL1F1                     |
| PTX3     | 5806   | pentraxin 3                                               | TNFAIP5 TSG-14                                           |
| IFNAR2   | 3455   | interferon alpha and beta receptor subunit 2              | IFN-R IFN-alpha-REC IFNABR IFNARB IMD45                  |
| IFN1@    | 3438   | -                                                         | IFNA                                                     |
| SYTL1    | 84958  | synaptotagmin like 1                                      | JFC1 SLP1                                                |
| APOBEC3C | 27350  | apolipoprotein B mRNA editing enzyme catalytic subunit 3C | A3C APOBEC1L ARDC2 ARDC4 ARP5 PB bK150C2.3               |
| DDX17    | 10521  | DEAD-box helicase 17                                      | P72 RH70                                                 |
| PTGS2    | 5743   | prostaglandin-endoperoxide synthase 2                     | COX-2 COX2 GRIPGHS PGG/HS PGHS-2 PHS-2 hCox-2            |
| HTR1A    | 3350   | 5-hydroxytryptamine receptor 1A                           | 5-HT-1A 5-HT1A 5HT1a ADRB2RL1 ADRBRL1 G-21 PFMCD         |
| SEPTIN7  | 989    | septin 7                                                  | CDC10 CDC3 NBLA02942 SEPT7 SEPT7A                        |
| CD40LG   | 959    | CD40 ligand                                               | CD154 CD40L HIGM1 IGM IMD3 T-BAM TNFSF5 TRAP gp39 hCD40L |
| CD14     | 929    | CD14 molecule                                             | -                                                        |
| CD8A     | 925    | CD8a molecule                                             | CD8 Leu2 p32                                             |
| CD4      | 920    | CD4 molecule                                              | CD4mut                                                   |

|        |        |                                                                        |                                                                         |
|--------|--------|------------------------------------------------------------------------|-------------------------------------------------------------------------|
| MASP1  | 5648   | mannan binding lectin serine peptidase 1                               | 3MC1 CRARF CRARF1 MAP1 MASP MA SP3 MAp44 PRSS5 RaRF                     |
| PROC   | 5624   | protein C, inactivator of coagulation factors Va and VIIIa             | APC PC PROC1 THPH3 THPH4                                                |
| MAP2K2 | 5605   | mitogen-activated protein kinase kinase 2                              | CFC4 MAPKK2 MEK2 MKK2 PRKMK2                                            |
| MAP2K1 | 5604   | mitogen-activated protein kinase kinase 1                              | CFC3 MAPKK1 MEK1 MKK1 PRKMK1                                            |
| HRG    | 3273   | histidine rich glycoprotein                                            | HPRG HRGP THPH11                                                        |
| NDRG1  | 10397  | N-myc downstream regulated 1                                           | CAP43 CMT4D DRG-1 DRG1 GC4 HMSNL NDR1 NMSL PRO XY1 RIT42 RTP TARG1 TDD5 |
| IRF9   | 10379  | interferon regulatory factor 9                                         | IRF-9 ISGF3 ISGF3G p48                                                  |
| TRIM22 | 10346  | tripartite motif containing 22                                         | GPSTAF50 RNF94 STAF50                                                   |
| LANCL1 | 10314  | LanC like 1                                                            | GPR69A p40                                                              |
| PPP4C  | 5531   | protein phosphatase 4 catalytic subunit                                | PP-X PP4 PP4C PPH3 PPP4 PPX                                             |
| HMOX1  | 3162   | heme oxygenase 1                                                       | HMOX1D HO-1 HSP32 bK286B10                                              |
| HMGB1  | 3146   | high mobility group box 1                                              | HMG-1 HMG1 HMG3 SBP-1                                                   |
| HLA-B  | 3106   | major histocompatibility complex, class I, B                           | AS B-4901 HLAB                                                          |
| RNASE7 | 84659  | ribonuclease A family member 7                                         | RAE1                                                                    |
| ABCC4  | 10257  | ATP binding cassette subfamily C member 4                              | MOAT-B MOATB MRP4                                                       |
| HGF    | 3082   | hepatocyte growth factor                                               | DFNB39 F-TCF HGFB HPTA SF                                               |
| HDAC1  | 3065   | histone deacetylase 1                                                  | GON-10 HD1 KDAC1 RPD3 RPD3L1                                            |
| IFNLR1 | 163702 | interferon lambda receptor 1                                           | CRF2/12 IFNLR IL-28R1 IL28RA LICR2                                      |
| PLSCR1 | 5359   | phospholipid scramblase 1                                              | MMTRA1B                                                                 |
| B2M    | 567    | beta-2-microglobulin                                                   | IMD43                                                                   |
| BACH2  | 60468  | BTB domain and CNC homolog 2                                           | BTBD25 IMD60                                                            |
| TANK   | 10010  | TRAF family member associated NFKB activator                           | I-TRAF ITRAF TRAF2                                                      |
| PIK3CG | 5294   | phosphatidylinositol-4,5-bisphosphate 3-kinase catalytic subunit gamma | PI3CG PI3K PI3Kgamma PIK3 p110gamma p120-PI3K                           |
| ARRB1  | 408    | arrestin beta 1                                                        | ARB1 ARR1                                                               |
| RSAD2  | 91543  | radical S-adenosyl methionine domain containing 2                      | 2510004L01Rik cig33 cig5 vig1                                           |
| STAB2  | 55576  | stabilin 2                                                             | FEEL2 FELE-2 FELL2 FEX2 HARE SCARH1                                     |
| TBK1   | 29110  | TANK binding kinase 1                                                  | FTDALS4 IIAE8 NAK T2K                                                   |
| PDYN   | 5173   | prodynorphin                                                           | ADCA PENKB SCA23                                                        |
| PDGFRB | 5159   | platelet derived growth factor receptor beta                           | CD140B IBGC4 IMF1 JTK12 KOGS PDG FR PDGFR-1 PDGFR1 PENTT                |
| PDCD1  | 5133   | programmed cell death 1                                                | CD279 PD-1 PD1 SLEB2 hPD-1 hPD-1 hSLE1                                  |
| PCSK2  | 5126   | proprotein convertase subtilisin/kexin type 2                          | NEC 2 NEC-2 NEC2 PC2 SPC2                                               |
| PCSK1  | 5122   | proprotein convertase subtilisin/kexin type 1                          | BMIQ12 NEC1 PC1 PC3 SPC3                                                |
| ARG2   | 384    | arginase 2                                                             | -                                                                       |
| AQP9   | 366    | aquaporin 9                                                            | AQP-9 HsT17287 SSC1 T17287                                              |
| FASLG  | 356    | Fas ligand                                                             | ALPS1B APT1LG1 APTL CD178 CD95-L CD95L FASL TNFSF6 TNLG1A               |

|          |       |                                                      |                                                                                       |
|----------|-------|------------------------------------------------------|---------------------------------------------------------------------------------------|
| APOH     | 350   | apolipoprotein H                                     | B2G1 B2GP1 BG                                                                         |
| BIRC5    | 332   | baculoviral IAP repeat containing 5                  | API4 EPR-1                                                                            |
| ANXA6    | 309   | annexin A6                                           | ANX6 CBP68 CPB-II p68 p70                                                             |
| IL22     | 50616 | interleukin 22                                       | IL-21 IL-22 IL-D110 IL-TIF ILTIF TIFIL-23 TIFa zcyto18                                |
| VTN      | 7448  | vitronectin                                          | V75 VN VNT                                                                            |
| VIM      | 7431  | vimentin                                             | -                                                                                     |
| VCAM1    | 7412  | vascular cell adhesion molecule                      | CD106 INCAM-100                                                                       |
| PRDX1    | 5052  | peroxiredoxin 1                                      | MSP23 NKEF-A NKEFA PAG PAGA PAGB PRX1 PRXI TDPX2                                      |
| GFAP     | 2670  | glial fibrillary acidic protein                      | ALXDRD                                                                                |
| GBP2     | 2634  | guanylate binding protein 2                          | -                                                                                     |
| ALB      | 213   | albumin                                              | HSA PRO0883 PRO0903 PRO1341                                                           |
| SLC29A3  | 55315 | solute carrier family 29 member 3                    | ENT3 HCLAP HJCD PHID                                                                  |
| OAS1     | 4938  | 2'-5'-oligoadenylate synthetase 1                    | E18/E16 IFI-4 OIAS OIASI                                                              |
| AGER     | 177   | advanced glycosylation end-product specific receptor | RAGE SCARJ1                                                                           |
| UNC93B1  | 81622 | unc-93 homolog B1, TLR signaling regulator           | IIAE1 UNC93 UNC93B Unc-93B1                                                           |
| TNFSF4   | 7292  | TNF superfamily member 4                             | CD134L CD252 GP34 OX-40L OX40L TNLG2B TXGP1                                           |
| NOS1     | 4842  | nitric oxide synthase 1                              | IHPS1 N-NOS NC-NOS NOS bNOS nNOS                                                      |
| ACTG1    | 71    | actin gamma 1                                        | ACT ACTG DFNA20 DFNA26 HEL-176                                                        |
| ACTA1    | 58    | actin alpha 1, skeletal muscle                       | ACTA ASMA CFTD CFTD1 CFTDM MPFD NEM1 NEM2 NEM3 SHPM                                   |
| ACO1     | 48    | aconitase 1                                          | ACONS HEL60 IREB1 IREBP IREBP1 IRP1                                                   |
| SERPINA3 | 12    | serpin family A member 3                             | AACT ACT GIG24 GIG25                                                                  |
| CXCR1    | 3577  | C-X-C motif chemokine receptor 1                     | C-C C-C-CKR-1 CD128 CD181 CDw128a CKR-1 CMKAR1 IL8R1 IL8RA IL8RBA                     |
| CCL15    | 6359  | C-C motif chemokine ligand 15                        | HCC-2 HMRP-2B LKN-1 LKN1 MIP-1 delta MIP-1D MIP-5 MRP-2B NCC-3 NCC3 SCYA15 SCYL3 SY15 |
| CCL14    | 6358  | C-C motif chemokine ligand 14                        | CC-1 CC-3 CKB1 HCC-1 HCC-1(1-74) HCC-1/HCC-3 HCC-3 MCIF NCC-2 NCC2 SCYA14 SCYL2 SY14  |
| CCL4     | 6351  | C-C motif chemokine ligand 4                         | ACT2 AT744.1 G-26 HC21 LAG-1 LAG1 MIP-1-beta MIP1B MIP1B1 SCYA2 SCYA4                 |
| CCL16    | 6360  | C-C motif chemokine ligand 16                        | CKb12 HCC-4 LINCK LCC-1 LEC LMC Mtn-1 NCC-4 NCC4 SCYA16 SCYL4                         |
| CCL19    | 6363  | C-C motif chemokine ligand 19                        | CKb11 ELC MIP-3b MIP3B SCYA19                                                         |
| CCL13    | 6357  | C-C motif chemokine ligand 13                        | CKb10 MCP-4 NCC-1 NCC1 SCYA13 SCYL1                                                   |
| CCL18    | 6362  | C-C motif chemokine ligand 18                        | AMAC-1 AMAC1 CKb7 DC-CK1 DCCK1 MIP-4 PARC SCYA18                                      |
| CCL17    | 6361  | C-C motif chemokine ligand 17                        | A-152E5.3 ABCD-2 SCYA17 TARC                                                          |
| CCL26    | 10344 | C-C motif chemokine ligand 26                        | IMAC MIP-4a MIP-4alpha SCYA26 TSC-1                                                   |

|        |        |                                     |                                                                            |
|--------|--------|-------------------------------------|----------------------------------------------------------------------------|
| CCL22  | 6367   | C-C motif chemokine ligand 22       | A-152E5.1 ABCD-1 DC/B-CK MDC SCYA22 STCP-1                                 |
| CCR3   | 1232   | C-C motif chemokine receptor 3      | C C CKR3 CC-CKR-3 CD193 CKR3 CKR3 CMKBR3                                   |
| CCL28  | 56477  | C-C motif chemokine ligand 28       | CCK1 MEC SCYA28                                                            |
| CCL4L1 | 388372 | C-C motif chemokine ligand 4 like 1 | AT744.2 CCL4L LAG-1 LAG1 MIP-1-beta SCYA4L SCYA4L1 SCYA4L2                 |
| ACKR2  | 1238   | atypical chemokine receptor 2       | CCBP2 CCR10 CCR9 CMKBR9 D6 hD6                                             |
| CCR7   | 1236   | C-C motif chemokine receptor 7      | BLR2 CC-CKR-7 CCR-7 CD197 CDw197 CMKBR7 EBI1                               |
| CCL27  | 10850  | C-C motif chemokine ligand 27       | ALP CTACK CTAK ESKINE ILC PESKY SCYA27                                     |
| CCR8   | 1237   | C-C motif chemokine receptor 8      | CC-CKR-8 CCR-8 CDw198 CKRL1 CMKBR8 CMKBRL2 CY6 GPRCY6 TER1                 |
| ACKR4  | 51554  | atypical chemokine receptor 4       | CC-CKR-11 CCBP2 CCR-11 CCR10 CCR11 CCRL1 CCXCKR CCX-CKR CKR-11 PPR1 VSHK1  |
| CCR10  | 2826   | C-C motif chemokine receptor 10     | GPR2                                                                       |
| CCL2   | 6347   | C-C motif chemokine ligand 2        | GDCF-2 HC11 HSMCR30 MCAF MCP-1 MCP1 SCYA2 SMC-CF                           |
| CCL21  | 6366   | C-C motif chemokine ligand 21       | 6Ckine CKb9 ECL SCYA21 SLC TCA4                                            |
| CCL7   | 6354   | C-C motif chemokine ligand 7        | FIC MARC MCP-3 MCP3 NC28 SCYA6 SCYA7                                       |
| CCL5   | 6352   | C-C motif chemokine ligand 5        | D17S136E RANTES SCYA5 SIS-delta SISd TCP228 eoCP                           |
| CCL3   | 6348   | C-C motif chemokine ligand 3        | G0S19-1 LD78ALPHA MIP-1-alpha MIP1A SCYA3                                  |
| CCL20  | 6364   | C-C motif chemokine ligand 20       | CKb4 Exodus LARC MIP-3-alpha MIP-3a MIP3A SCYA20 ST38                      |
| CCL11  | 6356   | C-C motif chemokine ligand 11       | SCYA11                                                                     |
| CCR5   | 1234   | C-C motif chemokine receptor 5      | CC-CKR-5 CCCKR5 CCR-5 CD195 CKR-5 CKR5 CMKBR5 IDDM22                       |
| CCL23  | 6368   | C-C motif chemokine ligand 23       | CK-BETA-8 CKb8 Ckb-8 Ckb-8-1 MIP-3 MIP3 MPIF-1 SCYA23 hmrp-2a              |
| CCL25  | 6370   | C-C motif chemokine ligand 25       | Ckb15 SCYA25 TECK                                                          |
| CCL1   | 6346   | C-C motif chemokine ligand 1        | I-309 P500 SCYA1 SISe TCA3                                                 |
| CCL3L3 | 414062 | C-C motif chemokine ligand 3 like 3 | 464.2 D17S1718 G0S19-2 LD78 LD78BETA SCYA3L SCYA3L1                        |
| CCL4L2 | 9560   | C-C motif chemokine ligand 4 like 2 | AT744.2 CCL4L SCYA4L SCYQ4L2                                               |
| CXCL12 | 6387   | C-X-C motif chemokine ligand 12     | IRH PBSF SCYB12 SDF1 TLSF TPAR1                                            |
| XCL1   | 6375   | X-C motif chemokine ligand 1        | ATAC LPTN LTN SCM-1 SCM-1a SCM1 SCM1A SCYC1                                |
| CCL8   | 6355   | C-C motif chemokine ligand 8        | HC14 MCP-2 MCP2 SCYA10 SCYA8                                               |
| CCL3L1 | 6349   | C-C motif chemokine ligand 3 like 1 | 464.2 D17S1718 G0S19-2 LD78 LD78-beta(1-70) LD78BETA MIP1AP SCYA3L SCYA3L1 |
| CCR1   | 1230   | C-C motif chemokine receptor 1      | CD191 CKR-1 CKR1 CMKBR1 HM145 MIP1aR SCYAR1                                |
| CCL24  | 6369   | C-C motif chemokine ligand 24       | Ckb-6 MPIF-2 MPIF2 SCYA24                                                  |
| XCL2   | 6846   | X-C motif chemokine ligand 2        | SCM-1b SCM1B SCYC2                                                         |

|             |        |                                                          |                                                                                         |
|-------------|--------|----------------------------------------------------------|-----------------------------------------------------------------------------------------|
| CXCL1       | 2919   | C-X-C motif chemokine ligand 1                           | FSP GRO1 GROa MGSA MGSA-a NAP-3 SCYB1                                                   |
| CXCL10      | 3627   | C-X-C motif chemokine ligand 10                          | C7 IFI10 INP10 IP-10 SCYB10 crg-2 gIP-10 mob-1                                          |
| CXCR4       | 7852   | C-X-C motif chemokine receptor 4                         | CD184 D2S201E FB22 HM89 HSY3RR LAP-3 LAP3 LCR1 LESTR NPY3R NPYR NPYRL NPYY3R WHIM WHIMS |
| CXCL2       | 2920   | C-X-C motif chemokine ligand 2                           | CINC-2a GRO2 GROb MGSA-b MIP-2a MIP2 MIP2A SCYB2                                        |
| CXCR6       | 10663  | C-X-C motif chemokine receptor 6                         | BONZO CD186 STRL33 TYMSTR                                                               |
| CCR4        | 1233   | C-C motif chemokine receptor 4                           | CC-CKR-4 CD194 CKR4 CMKBR4 ChemR13 HGCN:14099 K5-5                                      |
| CXCL11      | 6373   | C-X-C motif chemokine ligand 11                          | H174 I-TAC IP-9 IP9 SCYB11 SCYB9B b-R1                                                  |
| TAFA5       | 25817  | TAFA chemokine like family member 5                      | FAM19A5 QLLK5208 TAFA-5 UNQ5208                                                         |
| TAFA3       | 284467 | TAFA chemokine like family member 3                      | FAM19A3 TAFA-3                                                                          |
| TAFA4       | 151647 | TAFA chemokine like family member 4                      | FAM19A4 TAFA-4                                                                          |
| TAFA1       | 407738 | TAFA chemokine like family member 1                      | FAM19A1 TAFA-1                                                                          |
| TAFA2       | 338811 | TAFA chemokine like family member 2                      | FAM19A2 TAFA-2                                                                          |
| CCL15-CCL14 | 348249 | CCL15-CCL14 readthrough (NMD candidate)                  | CCL15 HCC-2 LKN-1 MIP-5 MIP5 Mrp-2b NCC-3 NCC3 SCYA15                                   |
| IL6         | 3569   | interleukin 6                                            | BSF-2 BSF2 CDF HGF HSF IFN-beta-2 IFNB2 IL-6                                            |
| TNF         | 7124   | tumor necrosis factor                                    | DIF TNF-alpha TNFA TNFSF2 TNLG1F                                                        |
| IL1B        | 3553   | interleukin 1 beta                                       | IL-1 IL1-BETA IL1F2 IL1beta                                                             |
| IL18        | 3606   | interleukin 18                                           | IGIF IL-18 IL-1g IL1F4                                                                  |
| PTK2B       | 2185   | protein tyrosine kinase 2 beta                           | CADTK CAKB FADK2 FAK2 PKB PTK PYK2 RAFTK                                                |
| VEGFA       | 7422   | vascular endothelial growth factor A                     | MVCD1 VEGF VPF                                                                          |
| IL4         | 3565   | interleukin 4                                            | BCGF-1 BCGF1 BSF-1 BSF1 IL-4                                                            |
| CDH1        | 999    | cadherin 1                                               | Arc-1 BCDS1 CD324 CDHE ECAD LCAM UVO                                                    |
| CD40        | 958    | CD40 molecule                                            | Bp50 CDW40 TNFRSF5 p50                                                                  |
| DEFB103B    | 55894  | defensin beta 103B                                       | BD-3 DEFB-3 DEFB103 DEFB3 HBD-3 HBD3 HBP-3 HBP3                                         |
| F2RL1       | 2150   | F2R like trypsin receptor 1                              | GPR11 PAR2                                                                              |
| MMP9        | 4318   | matrix metalloproteinase 9                               | CLG4B GELB MANDP2 MMP-9                                                                 |
| LTBP1       | 4052   | latent transforming growth factor beta binding protein 1 | -                                                                                       |
| DEFB4A      | 1673   | defensin beta 4A                                         | BD-2 DEFB-2 DEFB102 DEFB2 DEFB4 HBD-2 SAP1                                              |
| TNFSF10     | 8743   | TNF superfamily member 10                                | APO2L Apo-2L CD253 TL2 TNLG6A TRAIL                                                     |
| IL13        | 3596   | interleukin 13                                           | IL-13 P600                                                                              |

|        |       |                                                   |                                                       |
|--------|-------|---------------------------------------------------|-------------------------------------------------------|
| IL10   | 3586  | interleukin 10                                    | CSIF GVHDS IL-10 IL10A TGIF                           |
| IL2    | 3558  | interleukin 2                                     | IL-2 TCGF lymphokine                                  |
| PPARG  | 5468  | peroxisome proliferator activated receptor gamma  | CIMT1 GLM1 NR1C3 PPARG1 PPARG2 PPARG5 PPARgamma       |
| FGR    | 2268  | FGR proto-oncogene, Src family tyrosine kinase    | SRC2 c-fgr c-src2 p55-Fgr p55c-fgr p58-Fgr p58c-fgr   |
| MIF    | 4282  | macrophage migration inhibitory factor            | GIF GLIF MMIF                                         |
| CRP    | 1401  | C-reactive protein                                | PTX1                                                  |
| JAK2   | 3717  | Janus kinase 2                                    | JTK10 THCYT3                                          |
| IL1A   | 3552  | interleukin 1 alpha                               | IL-1 alpha IL-1A IL1 IL1-ALPHA IL1F1                  |
| PTK2   | 5747  | protein tyrosine kinase 2                         | FADK FAK FAK1 FRNK PPP1R71 p125FAK pp125FAK           |
| PTGDR  | 5729  | prostaglandin D2 receptor                         | AS1 ASRT1 DP DP1 PTGDR1                               |
| CD86   | 942   | CD86 molecule                                     | B7-2 B7.2 B70 CD28LG2 LAB72                           |
| HCK    | 3055  | HCK proto-oncogene, Src family tyrosine kinase    | JTK9 p59Hck p61Hck                                    |
| ARRB1  | 408   | arrestin beta 1                                   | ARB1 ARR1                                             |
| GNAI1  | 2770  | G protein subunit alpha i1                        | Gi                                                    |
| VDR    | 7421  | vitamin D receptor                                | NR1I1 PPP1R163                                        |
| OLR1   | 4973  | oxidized low density lipoprotein receptor 1       | CLEC8A LOX1 LOXIN SCARE1 SLOX1                        |
| GRK2   | 156   | G protein-coupled receptor kinase 2               | ADRBK1 BARK1 BETA-ARK1                                |
| TXK    | 7294  | TXK tyrosine kinase                               | BTKL PSCTK5 PTK4 RLK TKL                              |
| RNASE2 | 6036  | ribonuclease A family member 2                    | EDN RAF3 RNS2                                         |
| CD79A  | 973   | CD79a molecule                                    | IGA MB-1                                              |
| CD79B  | 974   | CD79b molecule                                    | AGM6 B29 IGB                                          |
| LYN    | 4067  | LYN proto-oncogene, Src family tyrosine kinase    | JTK8 p53Lyn p56Lyn                                    |
| SYK    | 6850  | spleen associated tyrosine                        | p72-Syk                                               |
| BTK    | 695   | Bruton tyrosine kinase                            | AGMX1 AT ATK BPK IGHD3 IMD1 PSCTK1 XLA                |
| BLNK   | 29760 | B cell linker                                     | AGM4 BASH BLNK-S LY57 SLP-65 SLP65 bca                |
| VAV3   | 10451 | vav guanine nucleotide exchange factor 3          | -                                                     |
| VAV1   | 7409  | vav guanine nucleotide exchange factor 1          | VAV                                                   |
| VAV2   | 7410  | vav guanine nucleotide exchange factor 2          | VAV-2                                                 |
| RAC1   | 5879  | Rac family small GTPase 1                         | MIG5 MRD48 Rac-1 TC-25 p21-Rac1                       |
| RAC2   | 5880  | Rac family small GTPase 2                         | EN-7 Gx HSPC022 p21-Rac2                              |
| RAC3   | 5881  | Rac family small GTPase 3                         | -                                                     |
| PPP3CA | 5530  | protein phosphatase 3 catalytic subunit alpha     | ACCIID CALN CALNA CALNA1 CCN1 CNA1 IECEE IECEE1 PPP2B |
| PPP3CB | 5532  | protein phosphatase 3 catalytic subunit beta      | CALNA2 CALNB CNA2 PP2Bbeta                            |
| PPP3CC | 5533  | protein phosphatase 3 catalytic subunit gamma     | CALNA3 CNA3 PP2Bgamma                                 |
| CHP1   | 11261 | calcineurin like EF-hand protein 1                | CHP SLC9A1BP SPAX9 Sid470p p22 p24                    |
| PPP3R1 | 5534  | protein phosphatase 3 regulatory subunit B, alpha | CALNB1 CNB CNB1                                       |

|        |       |                                                                     |                                                                                                                                |
|--------|-------|---------------------------------------------------------------------|--------------------------------------------------------------------------------------------------------------------------------|
| PPP3R2 | 5535  | protein phosphatase 3 regulatory subunit B, beta                    | PPP3RL                                                                                                                         |
| CHP2   | 63928 | calcineurin like EF-hand protein 2                                  | -                                                                                                                              |
| NFAT5  | 10725 | nuclear factor of activated T cells 5                               | NF-AT5 NFATL1 NFATZ OREBP TONEBP                                                                                               |
| NFATC1 | 4772  | nuclear factor of activated T cells 1                               | NF-ATC NF-ATc1.2 NFAT2 NFATc                                                                                                   |
| NFATC2 | 4773  | nuclear factor of activated T cells 2                               | NFAT1 NFATP                                                                                                                    |
| NFATC3 | 4775  | nuclear factor of activated T cells 3                               | NF-AT4c NFAT4 NFATX                                                                                                            |
| NFATC4 | 4776  | nuclear factor of activated T cells 4                               | NF-AT3 NF-ATC4 NFAT3                                                                                                           |
| HRAS   | 3265  | HRas proto-oncogene, GTPase                                         | C-BAS HAS C-H-RAS C-HA-RAS1 CTLO H-RASIDX HAMSV HRAS1 RASH1 p21ras                                                             |
| KRAS   | 3845  | KRAS proto-oncogene, GTPase                                         | 'C-K-RAS C-K-RAS CFC2 K-RAS2A K-RAS2B K-RAS4A K-RAS4B K-Ras K-Ras2 KI-RAS KRAS1 KRAS2 NS NS3 OES RALD RASK2 c-Ki-ras c-Ki-ras2 |
| NRAS   | 4893  | NRAS proto-oncogene, GTPase                                         | ALPS4 CMNS N-ras NCMS NRAS1 NS6                                                                                                |
| FOS    | 2353  | Fos proto-oncogene, AP-1 transcription factor subunit               | AP-1 C-FOS p55                                                                                                                 |
| JUN    | 3725  | Jun proto-oncogene, AP-1 transcription factor subunit               | AP-1 AP1 c-Jun cJUN p39                                                                                                        |
| CARD11 | 84433 | caspase recruitment domain family member 11                         | BENTA BIMP3 CARMA1 IMD11 IMD11A PPBL                                                                                           |
| BCL10  | 8915  | BCL10 immune signaling adaptor                                      | CARMEN CIPER CLAP IMD37 c-E10 mE10                                                                                             |
| MALT1  | 10892 | MALT1 paracaspase                                                   | IMD12 MLT MLT1 PCASP1                                                                                                          |
| CHUK   | 1147  | component of inhibitor of nuclear factor kappa B kinase complex     | IKBKA IKK-alpha IKK1 IKKA NFKBIKA TCF16                                                                                        |
| IKBKB  | 3551  | inhibitor of nuclear factor kappa B kinase subunit beta             | IKK-beta IKK2 IKKB IMD15 IMD15A IMD15B NFKBIKB                                                                                 |
| IKBKG  | 8517  | inhibitor of nuclear factor kappa B kinase regulatory subunit gamma | AMCBX1 EDAID1 FIP-3 FIP3 Fip3p IKK-gamma IKKAP1 IKKG IMD33 IP IP1 IP2 PD2 NEMO ZC2HC9                                          |
| NFKB1  | 4790  | nuclear factor kappa B subunit 1                                    | CVID12 EBP-1 KBF1 NF-kB NF-kB1 NF-kappa-B1 NF-kappaB NF-kappabeta NFKB-p105 NFKB-p50 NFkappaB                                  |
| RELA   | 5970  | RELA proto-oncogene, NF-kB subunit                                  | CMCU NFKB3 p65                                                                                                                 |
| NFKBIA | 4792  | NFKB inhibitor alpha                                                | EDAID2 IKBA MAD-3 NFKBI                                                                                                        |
| NFKBIB | 4793  | NFKB inhibitor beta                                                 | IKBB TRIP9                                                                                                                     |
| NFKBIE | 4794  | NFKB inhibitor epsilon                                              | IKBE                                                                                                                           |
| CD81   | 975   | CD81 molecule                                                       | CVID6 S5.7 TAPA1 TSPAN28                                                                                                       |
| CD19   | 930   | CD19 molecule                                                       | B4 CVID3                                                                                                                       |
| CR2    | 1380  | complement C3d receptor 2                                           | C3DR CD21 CR CVID7 SLEB9                                                                                                       |
| PIK3R5 | 23533 | phosphoinositide-3-kinase regulatory subunit 5                      | F730038115Rik FOAP-2 P101-PI3K p101                                                                                            |

|         |       |                                                                        |                                                              |
|---------|-------|------------------------------------------------------------------------|--------------------------------------------------------------|
| PIK3R1  | 5295  | phosphoinositide-3-kinase regulatory subunit 1                         | AGM7 GRB1 IMD36 p85 p85-ALPHA                                |
| PIK3R2  | 5296  | phosphoinositide-3-kinase regulatory subunit 2                         | MPPH MPPH1 P85B p85 p85-BETA                                 |
| PIK3R3  | 8503  | phosphoinositide-3-kinase regulatory subunit 3                         | p55 p55-GAMMA p55PIK                                         |
| PIK3CA  | 5290  | phosphatidylinositol-4,5-bisphosphate 3-kinase catalytic subunit alpha | CLAPO CLOVE CWS5 MCAP MCM MCM TC PI3K PI3K-alpha p110-alpha  |
| PIK3CB  | 5291  | phosphatidylinositol-4,5-bisphosphate 3-kinase catalytic subunit beta  | P110BETA PI3K PI3KBETA PIK3C1                                |
| PIK3CD  | 5293  | phosphatidylinositol-4,5-bisphosphate 3-kinase catalytic subunit delta | APDS IMD14 P110DELTA PI3K p110D                              |
| PIK3CG  | 5294  | phosphatidylinositol-4,5-bisphosphate 3-kinase catalytic subunit gamma | PI3CG PI3K PI3Kgamma PIK3 p110gamma p120-PI3K                |
| AKT3    | 10000 | AKT serine/threonine kinase 3                                          | MPPH MPPH2 PKB-GAMMA PKBG PRKBG RAC-PK-gamma RAC-gamma STK-2 |
| AKT1    | 207   | AKT serine/threonine kinase 1                                          | AKT CWS6 PKB PKB-ALPHA PRKBA RAC RAC-ALPHA                   |
| AKT2    | 208   | AKT serine/threonine kinase 2                                          | HIHGHH PKBB PKBBETA PRKBB RAC-BETA                           |
| GSK3B   | 2932  | glycogen synthase kinase 3 beta                                        | -                                                            |
| INPP5D  | 3635  | inositol polyphosphate-5-phosphatase D                                 | SHIP SHIP-1 SHIP1 SIP-145 hp51CN p150Ship                    |
| CD22    | 933   | CD22 molecule                                                          | SIGLEC-2 SIGLEC2                                             |
| CD72    | 971   | CD72 molecule                                                          | CD72b LYB2                                                   |
| PTPN6   | 5777  | protein tyrosine phosphatase non-receptor type 6                       | HCP HCPH HPTP1C PTP-1C SH-PTP1 SHP-1 SHP-1L SHP1             |
| LILRB3  | 11025 | leukocyte immunoglobulin like receptor B3                              | CD85A HL9 ILT-5 ILT5 LILRA6 LIR-3 LIR3 PIR-B PIRB            |
| FCGR2B  | 2213  | Fc fragment of IgG receptor IIb                                        | CD32 CD32B FCG2 FCGR2 FCGR2C Fc RII-c IGFR2                  |
| RASGRP3 | 25780 | RAS guanyl releasing protein 3                                         | GRP3                                                         |
| PLCG2   | 5336  | phospholipase C gamma 2                                                | APLAID FCAS3 PLC-IV PLC-gamma-2                              |
| PRKCB   | 5579  | protein kinase C beta                                                  | PKC-beta PKCB PKC(2) PKCbeta PRKCB1 PRKCB2                   |
| IFITM1  | 8519  | interferon induced transmembrane protein 1                             | 9-27 CD225 DSPA2a IFI17 LEU13                                |
| IGH     | 3492  | immunoglobulin heavy locus                                             | IGD1 IGH.1@ IGH@ IGHD@ IGHDY1 IGHJ IGHJ@ IGHV IGHV@          |
| IGHA1   | 3493  | immunoglobulin heavy constant alpha 1                                  | IgA1                                                         |
| IGHA2   | 3494  | immunoglobulin heavy constant alpha 2 (A2m marker)                     | -                                                            |
| IGHD    | 3495  | immunoglobulin heavy constant delta                                    | -                                                            |
| IGHD1-1 | 28510 | immunoglobulin heavy diversity 1-1                                     | IGHD11                                                       |



|          |       |                                                      |               |
|----------|-------|------------------------------------------------------|---------------|
| IGHD1-14 | 28508 | immunoglobulin heavy diversity 1-14 (non-functional) | DM2 IGHD114   |
| IGHD1-20 | 28507 | immunoglobulin heavy diversity 1-20                  | IGHD120       |
| IGHD1-26 | 28506 | immunoglobulin heavy diversity 1-26                  | IGHD126       |
| IGHD1-7  | 28509 | immunoglobulin heavy diversity 1-7                   | DM1 IGHD17    |
| IGHD2-15 | 28503 | immunoglobulin heavy diversity 2-15                  | D2 IGHD215    |
| IGHD2-2  | 28505 | immunoglobulin heavy diversity 2-2                   | IGHD22        |
| IGHD2-21 | 28502 | immunoglobulin heavy diversity 2-21                  | IGHD221       |
| IGHD2-8  | 28504 | immunoglobulin heavy diversity 2-8                   | DLR1 IGHD28   |
| IGHD3-10 | 28499 | immunoglobulin heavy diversity 3-10                  | DXP'1 IGHD310 |
| IGHD3-16 | 28498 | immunoglobulin heavy diversity 3-16                  | IGHD316       |
| IGHD3-22 | 28497 | immunoglobulin heavy diversity 3-22                  | IGHD322       |
| IGHD3-3  | 28501 | immunoglobulin heavy diversity 3-3                   | DXP4 IGHD33   |
| IGHD3-9  | 28500 | immunoglobulin heavy diversity 3-9                   | DXP1 IGHD39   |
| IGHD4-11 | 28495 | immunoglobulin heavy diversity 4-11 (non-functional) | DA1 IGHD411   |
| IGHD4-17 | 28494 | immunoglobulin heavy diversity 4-17                  | IGHD417       |
| IGHD4-23 | 28493 | immunoglobulin heavy diversity 4-23 (non-functional) | IGHD423       |
| IGHD4-4  | 28496 | immunoglobulin heavy diversity 4-4                   | DA4 IGHD44    |
| IGHD5-12 | 28491 | immunoglobulin heavy diversity 5-12                  | DK1 IGHD512   |
| IGHD5-18 | 28490 | immunoglobulin heavy diversity 5-18                  | IGHD518       |
| IGHD5-24 | 28489 | immunoglobulin heavy diversity 5-24 (non-functional) | IGHD524       |
| IGHD5-5  | 28492 | immunoglobulin heavy diversity 5-5                   | DK4 IGHD55    |
| IGHD6-13 | 28487 | immunoglobulin heavy diversity 6-13                  | DN1 IGHD613   |
| IGHD6-19 | 28486 | immunoglobulin heavy diversity 6-19                  | IGHD619       |
| IGHD6-25 | 28485 | immunoglobulin heavy diversity 6-25                  | IGHD625       |
| IGHD6-6  | 28488 | immunoglobulin heavy diversity 6-6                   | D(N4) IGHD66  |
| IGHD7-27 | 28484 | immunoglobulin heavy diversity 7-27                  | DHQ52 IGHD727 |
| IGHE     | 3497  | immunoglobulin heavy constant epsilon                | IgE           |

|            |       |                                                       |                                                     |
|------------|-------|-------------------------------------------------------|-----------------------------------------------------|
| IGHG1      | 3500  | immunoglobulin heavy constant gamma 1 (G1m marker)    | -                                                   |
| IGHG2      | 3501  | immunoglobulin heavy constant gamma 2 (G2m marker)    | -                                                   |
| IGHG3      | 3502  | immunoglobulin heavy constant gamma 3 (G3m marker)    | IgG3                                                |
| IGHG4      | 3503  | immunoglobulin heavy constant gamma 4 (G4m marker)    | -                                                   |
| IGHJ1      | 28483 | immunoglobulin heavy joining 1                        | JH1                                                 |
| IGHJ2      | 28481 | immunoglobulin heavy joining 2                        | JH2                                                 |
| IGHJ3      | 28479 | immunoglobulin heavy joining 3                        | JH3b                                                |
| IGHJ4      | 28477 | immunoglobulin heavy joining 4                        | JH4b                                                |
| IGHJ5      | 28476 | immunoglobulin heavy joining 5                        | JH5b                                                |
| IGHJ6      | 28475 | immunoglobulin heavy joining 6                        | JH6b                                                |
| IGHM       | 3507  | immunoglobulin heavy constant mu                      | AGM1 MU VH                                          |
| IGH        | 3492  | immunoglobulin heavy locus                            | IGD1 IGH.1@ IGH@ IGHD@ IGHDY1 IGHJ IGHJ@ IGHV IGHV@ |
| IGHV1-18   | 28468 | immunoglobulin heavy variable 1-18                    | IGHV118                                             |
| IGHV1-2    | 28474 | immunoglobulin heavy variable 1-2                     | IGHV12 V35                                          |
| IGHV1-24   | 28467 | immunoglobulin heavy variable 1-24                    | IGHV124 VH                                          |
| IGHV1-3    | 28473 | immunoglobulin heavy variable 1-3                     | IGHV13 VI-3B                                        |
| IGHV1-45   | 28466 | immunoglobulin heavy variable 1-45                    | IGHV145 VH                                          |
| IGHV1-46   | 28465 | immunoglobulin heavy variable 1-46                    | IGHV146                                             |
| IGHV1-58   | 28464 | immunoglobulin heavy variable 1-58                    | IGHV158 VH                                          |
| IGHV1-69   | 28461 | immunoglobulin heavy variable 1-69                    | IGHV1-E IGHV169 IGHV1E                              |
| IGHV1-8    | 28472 | immunoglobulin heavy variable 1-8                     | IGHV18                                              |
| IGHV1-38-4 | 28460 | immunoglobulin heavy variable 1-38-4 (non-functional) | IGHV1-C IGHV1C                                      |
| IGHV1-69-2 | 28458 | immunoglobulin heavy variable 1-69-2                  | IGHV1-F IGHV1F                                      |
| IGHV2-26   | 28455 | immunoglobulin heavy variable 2-26                    | IGHV226 VH                                          |
| IGHV2-5    | 28457 | immunoglobulin heavy variable 2-5                     | IGHV25 VH                                           |
| IGHV2-70   | 28454 | immunoglobulin heavy variable 2-70                    | IGHV270 VH                                          |
| IGHV3-11   | 28450 | immunoglobulin heavy variable 3-11                    | IGHV311 VH                                          |
| IGHV3-13   | 28449 | immunoglobulin heavy variable 3-13                    | IGHV313                                             |
| IGHV3-15   | 28448 | immunoglobulin heavy variable 3-15                    | IGHV315 VH                                          |
| IGHV3-16   | 28447 | immunoglobulin heavy variable 3-16 (non-functional)   | IGHV316 VH                                          |

|            |       |                                                       |                                            |
|------------|-------|-------------------------------------------------------|--------------------------------------------|
| IGHV3-20   | 28445 | immunoglobulin heavy variable 3-20                    | IGHV320 VH                                 |
| IGHV3-21   | 28444 | immunoglobulin heavy variable 3-21                    | IGHV321 VH                                 |
| IGHV3-23   | 28442 | immunoglobulin heavy variable 3-23                    | DP47 IGHV323 V3-23 VH26                    |
| IGHV3-30   | 28439 | immunoglobulin heavy variable 3-30                    | IGHV330 VH                                 |
| IGHV3-30-3 | 57290 | immunoglobulin heavy variable 3-30-3                  | IGHV3-3 IGHV3303                           |
| IGHV3-30-5 | 89770 | immunoglobulin heavy variable 3-30-5                  | IGHV3-3 IGHV3305                           |
| IGHV3-33   | 28434 | immunoglobulin heavy variable 3-33                    | IGHV333 VH                                 |
| IGHV3-35   | 28432 | immunoglobulin heavy variable 3-35 (non-functional)   | IGHV335 VH                                 |
| IGHV3-38   | 28429 | immunoglobulin heavy variable 3-38 (non-functional)   | IGHV338 VH                                 |
| IGHV3-43   | 28426 | immunoglobulin heavy variable 3-43                    | IGHV343 VH                                 |
| IGHV3-48   | 28424 | immunoglobulin heavy variable 3-48                    | IGHV348 VH                                 |
| IGHV3-49   | 28423 | immunoglobulin heavy variable 3-49                    | IGHV349 VH                                 |
| IGHV3-53   | 28420 | immunoglobulin heavy variable 3-53                    | IGHV353 VH                                 |
| IGHV3-64   | 28414 | immunoglobulin heavy variable 3-64                    | IGHV364 VH                                 |
| IGHV3-66   | 28412 | immunoglobulin heavy variable 3-66                    | IGHV366 VH                                 |
| IGHV3-7    | 28452 | immunoglobulin heavy variable 3-7                     | IGHV37 VH                                  |
| IGHV3-72   | 28410 | immunoglobulin heavy variable 3-72                    | IGHV372 VH                                 |
| IGHV3-73   | 28409 | immunoglobulin heavy variable 3-73                    | IGHV373 VH                                 |
| IGHV3-74   | 28408 | immunoglobulin heavy variable 3-74                    | IGHV374 VH                                 |
| IGHV3-9    | 28451 | immunoglobulin heavy variable 3-9                     | IGHV39 VH                                  |
| IGHV3-38-3 | 28404 | immunoglobulin heavy variable 3-38-3 (non-functional) | IGHV3-D IGHV3D                             |
| IGHV3-69-1 | 28402 | immunoglobulin heavy variable 3-69-1 (pseudogene)     | IGH IGHM IGHV IGHV3-11 IGHV3-H IGHV3H IgVH |
| IGHV4-28   | 28400 | immunoglobulin heavy variable 4-28                    | IGHV428 VH                                 |
| IGHV4-30-1 | 28399 | immunoglobulin heavy variable 4-30-1                  | IGHV4-3                                    |
| IGHV4-30-2 | 28398 | immunoglobulin heavy variable 4-30-2                  | IGHV4-3 IGHV4302                           |
| IGHV4-30-4 | 28397 | immunoglobulin heavy variable 4-30-4                  | IGHV4-3 IGHV4304                           |
| IGHV4-31   | 28396 | immunoglobulin heavy variable 4-31                    | IGHV431                                    |

|            |       |                                                     |                                             |
|------------|-------|-----------------------------------------------------|---------------------------------------------|
| IGHV4-34   | 28395 | immunoglobulin heavy variable 4-34                  | IGHV434 VH                                  |
| IGHV4-39   | 28394 | immunoglobulin heavy variable 4-39                  | IGHV439 VH                                  |
| IGHV4-4    | 28401 | immunoglobulin heavy variable 4-4                   | IGHV44 VH                                   |
| IGHV4-59   | 28392 | immunoglobulin heavy variable 4-59                  | IGHV459 VH                                  |
| IGHV4-61   | 28391 | immunoglobulin heavy variable 4-61                  | IGHV461 VH                                  |
| IGHV4-38-2 | 28389 | immunoglobulin heavy variable 4-38-2                | IGHV4-B IGHV4B                              |
| IGHV5-51   | 28388 | immunoglobulin heavy variable 5-51                  | IGHV551 VH                                  |
| IGHV5-10-1 | 28386 | immunoglobulin heavy variable 5-10-1                | IGHV5-A IGHV5A                              |
| IGHV6-1    | 28385 | immunoglobulin heavy variable 6-1                   | IGHV61 VH                                   |
| IGHV7-4-1  | 57289 | immunoglobulin heavy variable 7-4-1                 | IGHV7-41 IGHV741                            |
| IGHV7-81   | 28378 | immunoglobulin heavy variable 7-81 (non-functional) | IGHV781                                     |
| IGK        | 50802 | immunoglobulin kappa locus                          | IGK@                                        |
| IGKC       | 3514  | immunoglobulin kappa constant                       | HCAK1 IGKCD Km                              |
| IGKDEL     | 3515  | immunoglobulin kappa deleting element or like       | IGKDE                                       |
| IGKJ       | 7842  | -                                                   | IGKJ@                                       |
| IGKJ1      | 28950 | immunoglobulin kappa joining 1                      | J1                                          |
| IGKJ2      | 28949 | immunoglobulin kappa joining 2                      | J2                                          |
| IGKJ3      | 28948 | immunoglobulin kappa joining 3                      | J3                                          |
| IGKJ4      | 28947 | immunoglobulin kappa joining 4                      | J4                                          |
| IGKJ5      | 28946 | immunoglobulin kappa joining 5                      | J5                                          |
| IGKV@      | 3519  | -                                                   | IGKV IGKV1 IGKV1@ IGKV2 IGKV2@ IGKV3 IGKV3@ |
| IGKV1-12   | 28940 | immunoglobulin kappa variable 1-12                  | IGKV112 L19                                 |
| IGKV1-13   | 28939 | immunoglobulin kappa variable 1-13                  | IGKV113 L18                                 |
| IGKV1-16   | 28938 | immunoglobulin kappa variable 1-16                  | IGKV116 L1                                  |
| IGKV1-17   | 28937 | immunoglobulin kappa variable 1-17                  | A30 IGKV117                                 |
| IGKV1-27   | 28935 | immunoglobulin kappa variable 1-27                  | A20 IGKV127                                 |
| IGKV1-33   | 28933 | immunoglobulin kappa variable 1-33                  | IGKV133 O18                                 |
| IGKV1-37   | 28931 | immunoglobulin kappa variable 1-37 (non-functional) | IGKV137 O14                                 |
| IGKV1-39   | 28930 | immunoglobulin kappa variable 1-39                  | IGKV139 O12 O12a                            |
| IGKV1-5    | 28299 | immunoglobulin kappa variable 1-5                   | IGKV IGKV15 L12 L12a V1                     |
| IGKV1-6    | 28943 | immunoglobulin kappa variable 1-6                   | IGKV16 L11                                  |

|           |       |                                                      |                             |
|-----------|-------|------------------------------------------------------|-----------------------------|
| IGKV1-8   | 28942 | immunoglobulin kappa variable 1-8                    | IGKV18 L9                   |
| IGKV1-9   | 28941 | immunoglobulin kappa variable 1-9                    | IGKV19 L8                   |
| IGKV1D-12 | 28903 | immunoglobulin kappa variable 1D-12                  | IGKV1D12 L19                |
| IGKV1D-13 | 28902 | immunoglobulin kappa variable 1D-13                  | IGKV1D13 L18                |
| IGKV1D-16 | 28901 | immunoglobulin kappa variable 1D-16                  | IGKV1D16 L15 L15a           |
| IGKV1D-17 | 28900 | immunoglobulin kappa variable 1D-17                  | IGKV1D17 L14                |
| IGKV1D-33 | 28896 | immunoglobulin kappa variable 1D-33                  | IGKV1D33 O8                 |
| IGKV1D-37 | 28894 | immunoglobulin kappa variable 1D-37 (non-functional) | IGKV1D37 O4                 |
| IGKV1D-39 | 28893 | immunoglobulin kappa variable 1D-39                  | IGKV1D39 O2                 |
| IGKV1D-42 | 28892 | immunoglobulin kappa variable 1D-42 (non-functional) | IGKV1D42 L22                |
| IGKV1D-43 | 28891 | immunoglobulin kappa variable 1D-43                  | IGKV1D43 L23 L23a           |
| IGKV1D-8  | 28904 | immunoglobulin kappa variable 1D-8                   | IGKV1D8 L24 L24a            |
| IGKV2-24  | 28923 | immunoglobulin kappa variable 2-24                   | A23 IGKV224                 |
| IGKV2-28  | 28921 | immunoglobulin kappa variable 2-28                   | A19 IGKV228                 |
| IGKV2-30  | 28919 | immunoglobulin kappa variable 2-30                   | A17 IGKV230                 |
| IGKV2-40  | 28916 | immunoglobulin kappa variable 2-40                   | IGKV240 O11 O11a            |
| IGKV2D-24 | 28885 | immunoglobulin kappa variable 2D-24 (non-functional) | A7 IGKV2D24                 |
| IGKV2D-28 | 28883 | immunoglobulin kappa variable 2D-28                  | A3 IGKV2D28                 |
| IGKV2D-29 | 28882 | immunoglobulin kappa variable 2D-29                  | A2a A2c IGKV2D29            |
| IGKV2D-30 | 28881 | immunoglobulin kappa variable 2D-30                  | A1 IGKV2D30                 |
| IGKV2D-40 | 28878 | immunoglobulin kappa variable 2D-40                  | IGKV2D40 O1                 |
| IGKV3-11  | 28914 | immunoglobulin kappa variable 3-11                   | IGKV311 L6                  |
| IGKV3-15  | 28913 | immunoglobulin kappa variable 3-15                   | IGKV315 L2                  |
| IGKV3-20  | 28912 | immunoglobulin kappa variable 3-20                   | 13K18 A27 IGKV320           |
| IGKV3-7   | 28915 | immunoglobulin kappa variable 3-7 (non-functional)   | IGKV37 L10 L10a Vh          |
| IGKV3D-11 | 28876 | immunoglobulin kappa variable 3D-11                  | IGKV3D11 L20                |
| IGKV3D-15 | 28875 | immunoglobulin kappa variable 3D-15                  | IGKV3D15 L16 L16a L16b L16c |

|           |       |                                                       |                   |
|-----------|-------|-------------------------------------------------------|-------------------|
| IGKV3D-20 | 28874 | immunoglobulin kappa variable 3D-20                   | A11 A11a IGKV3D20 |
| IGKV3D-7  | 28877 | immunoglobulin kappa variable 3D-7                    | IGKV3D7 L25       |
| IGKV4-1   | 28908 | immunoglobulin kappa variable 4-1                     | B3 IGKV41         |
| IGKV5-2   | 28907 | immunoglobulin kappa variable 5-2                     | B2 IGKV52         |
| IGKV6-21  | 28906 | immunoglobulin kappa variable 6-21 (non-functional)   | A26 IGKV621       |
| IGKV6D-21 | 28870 | immunoglobulin kappa variable 6D-21 (non-functional)  | A10 IGKV6D21      |
| IGKV6D-41 | 28869 | immunoglobulin kappa variable 6D-41 (non-functional)  | A14               |
| IGL       | 3535  | immunoglobulin lambda locus                           | IGL@ IGLC6        |
| IGLC1     | 3537  | immunoglobulin lambda constant 1                      | IGLC              |
| IGLC2     | 3538  | immunoglobulin lambda constant 2                      | IGLC              |
| IGLC3     | 3539  | immunoglobulin lambda constant 3 (Kern-Oz+ marker)    | IGLC              |
| IGLC6     | 3542  | immunoglobulin lambda constant 6                      | IGLC              |
| IGLC7     | 28834 | immunoglobulin lambda constant 7                      | C7                |
| IGLJ      | 8217  | -                                                     | IGLJ@             |
| IGLJ1     | 28833 | immunoglobulin lambda joining 1                       | J1                |
| IGLJ2     | 28832 | immunoglobulin lambda joining 2                       | J2                |
| IGLJ3     | 28831 | immunoglobulin lambda joining 3                       | J3                |
| IGLJ4     | 28830 | immunoglobulin lambda joining 4 (non-functional)      | -                 |
| IGLJ5     | 28829 | immunoglobulin lambda joining 5 (non-functional)      | -                 |
| IGLJ6     | 28828 | immunoglobulin lambda joining 6                       | -                 |
| IGLJ7     | 28827 | immunoglobulin lambda joining 7                       | J7                |
| IGLV@     | 3546  | -                                                     | IGLV              |
| IGLV1-36  | 28826 | immunoglobulin lambda variable 1-36                   | IGLV136 V1-11     |
| IGLV1-40  | 28825 | immunoglobulin lambda variable 1-40                   | IGLV140 V1-13     |
| IGLV1-44  | 28823 | immunoglobulin lambda variable 1-44                   | IGLV144 V1-16     |
| IGLV1-47  | 28822 | immunoglobulin lambda variable 1-47                   | IGLV147 V1-17     |
| IGLV1-50  | 28821 | immunoglobulin lambda variable 1-50 (non-functional)  | IGLV150 V1-18     |
| IGLV1-51  | 28820 | immunoglobulin lambda variable 1-51                   | IGLV151 V1-19     |
| IGLV10-54 | 28772 | immunoglobulin lambda variable 10-54                  | IGLV1054 V1-20    |
| IGLV11-55 | 28770 | immunoglobulin lambda variable 11-55 (non-functional) | IGLV1155 V4-6     |
| IGLV2-11  | 28816 | immunoglobulin lambda variable 2-11                   | IGLV211 V1-3      |

|          |       |                                                      |                    |
|----------|-------|------------------------------------------------------|--------------------|
| IGLV2-14 | 28815 | immunoglobulin lambda variable 2-14                  | IGLV214 V1-4       |
| IGLV2-18 | 28814 | immunoglobulin lambda variable 2-18                  | IGLV218 V1-5       |
| IGLV2-23 | 28813 | immunoglobulin lambda variable 2-23                  | IGLV223 V1-7       |
| IGLV2-33 | 28811 | immunoglobulin lambda variable 2-33 (non-functional) | IGLV233 V1-9       |
| IGLV2-8  | 28817 | immunoglobulin lambda variable 2-8                   | IGLV28 V1-2        |
| IGLV3-1  | 28809 | immunoglobulin lambda variable 3-1                   | IGLV31 V2-1        |
| IGLV3-10 | 28803 | immunoglobulin lambda variable 3-10                  | IGLV310 V2-7       |
| IGLV3-12 | 28802 | immunoglobulin lambda variable 3-12                  | IGLV312 V2-8       |
| IGLV3-16 | 28799 | immunoglobulin lambda variable 3-16                  | IGLV316 V2-11      |
| IGLV3-19 | 28797 | immunoglobulin lambda variable 3-19                  | IGLV319 V2-13 VL3L |
| IGLV3-21 | 28796 | immunoglobulin lambda variable 3-21                  | IGLV321 V2-14      |
| IGLV3-22 | 28795 | immunoglobulin lambda variable 3-22                  | IGLV322 V2-15      |
| IGLV3-25 | 28793 | immunoglobulin lambda variable 3-25                  | IGLV325 V2-17      |
| IGLV3-27 | 28791 | immunoglobulin lambda variable 3-27                  | IGLV327 V2-19      |
| IGLV3-32 | 28787 | immunoglobulin lambda variable 3-32 (non-functional) | IGLV332 V2-23P     |
| IGLV3-9  | 28804 | immunoglobulin lambda variable 3-9                   | IGLV39 V2-6        |
| IGLV4-3  | 28786 | immunoglobulin lambda variable 4-3                   | IGLV43 V5-1        |
| IGLV4-60 | 28785 | immunoglobulin lambda variable 4-60                  | IGLV460 V5-4       |
| IGLV4-69 | 28784 | immunoglobulin lambda variable 4-69                  | IGLV469 V5-6       |
| IGLV5-37 | 28783 | immunoglobulin lambda variable 5-37                  | IGLV537 V4-1       |
| IGLV5-39 | 28782 | immunoglobulin lambda variable 5-39                  | IGLV539            |
| IGLV5-45 | 28781 | immunoglobulin lambda variable 5-45                  | IGLV545 V4-2       |
| IGLV5-48 | 28780 | immunoglobulin lambda variable 5-48 (non-functional) | IGLV548 V4-3       |
| IGLV5-52 | 28779 | immunoglobulin lambda variable 5-52                  | IGLV552 V4-4       |
| IGLV6-57 | 28778 | immunoglobulin lambda variable 6-57                  | IGLV657 V1-22      |
| IGLV7-43 | 28776 | immunoglobulin lambda variable 7-43                  | IGLV743 V3-2       |
| IGLV7-46 | 28775 | immunoglobulin lambda variable 7-46                  | IGLV746 V3-3       |

|             |        |                                           |                                                                                       |
|-------------|--------|-------------------------------------------|---------------------------------------------------------------------------------------|
| IGLV8-61    | 28774  | immunoglobulin lambda variable 8-61       | IGLV861 V3-4                                                                          |
| IGLV9-49    | 28773  | immunoglobulin lambda variable 9-49       | IGLV949 V5-2                                                                          |
| C3          | 718    | complement C3                             | AHUS5 ARMD9 ASP C3a C3b CPAMD1 HEL-S-62p                                              |
| C5          | 727    | complement C5                             | C5D C5a C5b CPAMD4 ECLZB                                                              |
| CAMP        | 820    | cathelicidin antimicrobial peptide        | CAP-18 CAP18 CRAMP FALL-39 FALL39 HSD26 LL37                                          |
| CCL1        | 6346   | C-C motif chemokine ligand 1              | I-309 P500 SCYA1 SISe TCA3                                                            |
| CCL11       | 6356   | C-C motif chemokine ligand 11             | SCYA11                                                                                |
| CCL13       | 6357   | C-C motif chemokine ligand 13             | CKb10 MCP-4 NCC-1 NCC1 SCYA13 SCYL1                                                   |
| CCL14       | 6358   | C-C motif chemokine ligand 14             | CC-1 CC-3 CKB1 HCC-1 HCC-1(1-74) HCC-1/HCC-3 HCC-3 MCIF NCC-2 NCC2 SCYA14 SCYL2 SY14  |
| CCL15-CCL14 | 348249 | CCL15-CCL14 readthrough (NMD candidate)   | CCL15 HCC-2 LKN-1 MIP-5 MIP5 Mrp-2b NCC-3 NCC3 SCYA15                                 |
| CCL15       | 6359   | C-C motif chemokine ligand 15             | HCC-2 HMRP-2B LKN-1 LKN1 MIP-1 delta MIP-1D MIP-5 MRP-2B NCC-3 NCC3 SCYA15 SCYL3 SY15 |
| CCL16       | 6360   | C-C motif chemokine ligand 16             | CKb12 HCC-4 ILINCK LCC-1 LEC LMC Mtn-1 NCC-4 NCC4 SCYA16 SCYL4                        |
| CCL17       | 6361   | C-C motif chemokine ligand 17             | A-152E5.3 ABCD-2 SCYA17 TARC                                                          |
| CCL18       | 6362   | C-C motif chemokine ligand 18             | AMAC-1 AMAC1 CKb7 DC-CK1 DCCK1 MIP-4 PARC SCYA18                                      |
| CCL19       | 6363   | C-C motif chemokine ligand 19             | CKb11 ELC MIP-3b MIP3B SCYA19                                                         |
| CCL2        | 6347   | C-C motif chemokine ligand 2              | GDCF-2 HC11 HSMCR30 MCAF MCP-1 MCP1 SCYA2 SMC-CF                                      |
| CCL20       | 6364   | C-C motif chemokine ligand 20             | CKb4 Exodus LARC MIP-3-alpha MIP-3a MIP3A SCYA20 ST38                                 |
| CCL21       | 6366   | C-C motif chemokine ligand 21             | 6Ckine CKb9 ECL SCYA21 SLC TCA4                                                       |
| CCL22       | 6367   | C-C motif chemokine ligand 22             | A-152E5.1 ABCD-1 DC/B-CK MDC SCYA22 STCP-1                                            |
| CCL23       | 6368   | C-C motif chemokine ligand 23             | CK-BETA-8 CKb8 Ckb-8 Ckb-8-1 MIP-3 MIP3 MPIF-1 SCYA23 hmrp-2a                         |
| CCL24       | 6369   | C-C motif chemokine ligand 24             | Ckb-6 MPIF-2 MPIF2 SCYA24                                                             |
| CCL25       | 6370   | C-C motif chemokine ligand 25             | Ckb15 SCYA25 TECK                                                                     |
| CCL26       | 10344  | C-C motif chemokine ligand 26             | IMAC MIP-4a MIP-4alpha SCYA26 TSC-1                                                   |
| CCL27       | 10850  | C-C motif chemokine ligand 27             | ALP CTACK CTAK ESKINE ILC PESKY SCYA27                                                |
| CCL28       | 56477  | C-C motif chemokine ligand 28             | CCK1 MEC SCYA28                                                                       |
| CCL3        | 6348   | C-C motif chemokine ligand 3              | G0S19-1 LD78ALPHA MIP-1-alpha MIP1A SCYA3                                             |
| CCL3L1      | 6349   | C-C motif chemokine ligand 3 like 1       | 464.2 D17S1718 G0S19-2 LD78 LD78-beta(1-70) LD78BETA MIP1AP SCYA3L SCYA3L1            |
| CCL3P1      | 390788 | C-C motif chemokine ligand 3 pseudogene 1 | CCL3L2 G0S19-3 LD78gamma SCYA3L2                                                      |
| CCL3L3      | 414062 | C-C motif chemokine ligand 3 like 3       | 464.2 D17S1718 G0S19-2 LD78 LD78BETA SCYA3L SCYA3L1                                   |



|          |        |                                         |                                                                       |
|----------|--------|-----------------------------------------|-----------------------------------------------------------------------|
| CCL4     | 6351   | C-C motif chemokine ligand 4            | ACT2 AT744.1 G-26 HC21 LAG-1 LAG1 MIP-1-beta MIP1B MIP1B1 SCYA2 SCYA4 |
| CCL4L2   | 9560   | C-C motif chemokine ligand 4 like 2     | AT744.2 CCL4L SCYA4L SCYQ4L2                                          |
| CCL4L1   | 388372 | C-C motif chemokine ligand 4 like 1     | AT744.2 CCL4L LAG-1 LAG1 MIP-1-beta SCYA4L SCYA4L1 SCYA4L2            |
| CCL5     | 6352   | C-C motif chemokine ligand 5            | D17S136E RANTES SCYA5 SIS-delta SISd TCP228 eoCP                      |
| CCL7     | 6354   | C-C motif chemokine ligand 7            | FIC MARC MCP-3 MCP3 NC28 SCYA6 SCYA7                                  |
| CCL8     | 6355   | C-C motif chemokine ligand 8            | HC14 MCP-2 MCP2 SCYA10 SCYA8                                          |
| CKLF     | 51192  | chemokine like factor                   | C32 CKLF1 CKLF2 CKLF3 CKLF4 HSPC224 UCK-1                             |
| CMA1     | 1215   | chymase 1                               | CYH MCT1 chymase                                                      |
| CTSG     | 1511   | cathepsin G                             | CATG CG                                                               |
| CX3CL1   | 6376   | C-X3-C motif chemokine ligand 1         | ABCD-3 C3Xkine CXC3 CXC3C NTN NTT SCYD1 fractalkine neurotactin       |
| CXCL1    | 2919   | C-X-C motif chemokine ligand 1          | FSP GRO1 GROa MGSA MGSA-a NAP-3 SCYB1                                 |
| CXCL10   | 3627   | C-X-C motif chemokine ligand 10         | C7 IFI10 INP10 IP-10 SCYB10 crg-2 gIP-10 mob-1                        |
| CXCL11   | 6373   | C-X-C motif chemokine ligand 11         | H174 I-TAC IP-9 IP9 SCYB11 SCYB9B b-R1                                |
| CXCL12   | 6387   | C-X-C motif chemokine ligand 12         | IRH PBSF SCYB12 SDF1 TLSF TPAR1                                       |
| CXCL13   | 10563  | C-X-C motif chemokine ligand 13         | ANGIE ANGIE2 BCA-1 BCA1 BLC BLR1L SCYB13                              |
| CXCL14   | 9547   | C-X-C motif chemokine ligand 14         | BMAC BRAK KEC KS1 MIP-2g MIP2G NJAC SCYB14                            |
| CXCL16   | 58191  | C-X-C motif chemokine ligand 16         | CXCLG16 SR-PSOX SRPSOX                                                |
| CXCL17   | 284340 | C-X-C motif chemokine ligand 17         | DMC Dcip1 UNQ473 VCC-1 VCC1                                           |
| CXCL2    | 2920   | C-X-C motif chemokine ligand 2          | CINC-2a GRO2 GROb MGSA-b MIP-2a MIP2 MIP2A SCYB2                      |
| CXCL3    | 2921   | C-X-C motif chemokine ligand 3          | CINC-2b GRO3 GROg MIP-2b MIP2B SCYB3                                  |
| CXCL5    | 6374   | C-X-C motif chemokine ligand 5          | ENA-78 SCYB5                                                          |
| CXCL6    | 6372   | C-X-C motif chemokine ligand 6          | CKA-3 GCP-2 GCP2 SCYB6                                                |
| CXCL9    | 4283   | C-X-C motif chemokine ligand 9          | CMK Humig MIG SCYB9 crg-10                                            |
| CCN1     | 3491   | cellular communication network factor 1 | CYR61 GIG1 IGFBP10                                                    |
| DEFA1    | 1667   | defensin alpha 1                        | DEF1 DEFA2 HNP-1 HP-1 HP1 MRS                                         |
| DEFA3    | 1668   | defensin alpha 3                        | DEF3 HNP-3 HNP3 HP-3 HP3                                              |
| DEFA5    | 1670   | defensin alpha 5                        | DEF5 HD-5                                                             |
| DEFB1    | 1672   | defensin beta 1                         | BD1 DEFB-1 DEFB101 HBD1                                               |
| DEFB103B | 55894  | defensin beta 103B                      | BD-3 DEFB-3 DEFB103 DEFB3 HBD-3 HBD3 HBP-3 HBP3                       |
| DEFB104A | 140596 | defensin beta 104A                      | BD-4 DEFB-4 DEFB104 DEFB4 hBD-4                                       |
| DEFB4A   | 1673   | defensin beta 4A                        | BD-2 DEFB-2 DEFB102 DEFB2 DEFB4 HBD-2 SAP1                            |
| EDN1     | 1906   | endothelin 1                            | ARCND3 ET1 HDLCQ7 PPET1 QME                                           |
| EDN2     | 1907   | endothelin 2                            | ET-2 ET2 PPET2                                                        |
| EDN3     | 1908   | endothelin 3                            | ET-3 ET3 HSCR4 PPET3 WS4B                                             |
| FGF10    | 2255   | fibroblast growth factor 10             | -                                                                     |

|        |        |                                               |                                                                                                           |
|--------|--------|-----------------------------------------------|-----------------------------------------------------------------------------------------------------------|
| FGF2   | 2247   | fibroblast growth factor 2                    | BFGF FGF-2 FGFB HBGF-2                                                                                    |
| HTN3   | 3347   | histatin 3                                    | HIS2 HTN2 HTN5 PB                                                                                         |
| CXCL8  | 3576   | C-X-C motif chemokine ligand 8                | GCP-1 GCP1 IL8 LECT LUCT LYNAP MDNCF MONAP NAF NAP-1 NAP1 SCYB8                                           |
| LECT2  | 3950   | leukocyte cell derived chemotaxin 2           | chm-II chm2                                                                                               |
| PF4    | 5196   | platelet factor 4                             | CXCL4 PF-4 SCYB4                                                                                          |
| PF4V1  | 5197   | platelet factor 4 variant 1                   | CXCL4L1 CXCL4V1 PF4-ALT PF4A SCYB4V1                                                                      |
| PLAU   | 5328   | plasminogen activator, urokinase              | ATF BDPLT5 QPD UPA URK u-PA                                                                               |
| PPBP   | 5473   | pro-platelet basic protein                    | B-TG1 Beta-TG CTAP-III CTAP3 CTAPIII CXCL7 LA-PF4 LDGF MDGF NAP-2 PBP SCYB7 TC1 TC2 TGB TGB1 THBGB THBGB1 |
| PPBPP1 | 728045 | pro-platelet basic protein pseudogene 1       | PPBPL1 TGB2                                                                                               |
| PROK2  | 60675  | prokineticin 2                                | BV8 HH4 KAL4 MIT1 PK2                                                                                     |
| RNASE2 | 6036   | ribonuclease A family member 2                | EDN RAF3 RNS2                                                                                             |
| SAA1   | 6288   | serum amyloid A1                              | PIG4 SAA SAA2 TP53I4                                                                                      |
| SAA2   | 6289   | serum amyloid A2                              | SAA SAA1                                                                                                  |
| SBDS   | 51119  | SBDS ribosome maturation                      | CGI-97 SDS SWDS                                                                                           |
| SEMA3A | 10371  | semaphorin 3A                                 | COLL1 HH16 Hsema-II Hsema-III SEMA1 SEMAD SEMAIII SEMAL SemD coll-1                                       |
| SEMA3B | 7869   | semaphorin 3B                                 | LUCA-1 SEMA5 SEMAA SemA semaV                                                                             |
| SEMA3C | 10512  | semaphorin 3C                                 | SEMAE SemE                                                                                                |
| SEMA3D | 223117 | semaphorin 3D                                 | Sema-Z2 coll-2                                                                                            |
| SEMA3E | 9723   | semaphorin 3E                                 | M-SEMAH M-SemaK SEMAH coll-5                                                                              |
| SEMA3F | 6405   | semaphorin 3F                                 | SEMA-IV SEMA4 SEMAK                                                                                       |
| SEMA3G | 56920  | semaphorin 3G                                 | sem2                                                                                                      |
| SEMA4A | 64218  | semaphorin 4A                                 | CORD10 RP35 SEMAB SEMB                                                                                    |
| SEMA4B | 10509  | semaphorin 4B                                 | SEMAC SemC                                                                                                |
| SEMA4C | 54910  | semaphorin 4C                                 | M-SEMA-F SEMACL1 SEMAF SEMAI                                                                              |
| SEMA4D | 10507  | semaphorin 4D                                 | A8 BB18 C9orf164 CD100 COLL4 GR3 M-sema-G SEMAJ coll-4                                                    |
| SEMA4F | 10505  | ssemaphorin 4F                                | M-SEMA PRO2353 S4F SEMAM SEMAW m-Sema-M                                                                   |
| SEMA4G | 57715  | semaphorin 4G                                 | -                                                                                                         |
| SEMA5A | 9037   | semaphorin 5A                                 | SEMAF semF                                                                                                |
| SEMA5B | 54437  | semaphorin 5B                                 | SEMAG SemG                                                                                                |
| SEMA6A | 57556  | semaphorin 6A                                 | HT018 SEMA SEMA6A1 SEMAQ VIA                                                                              |
| SEMA6B | 10501  | semaphorin 6B                                 | EPM11 SEM-SEMA-Y SEMA-VIB SEMAN semaZ                                                                     |
| SEMA6C | 10500  | semaphorin 6C                                 | SEMAY m-SemaY m-SemaY2                                                                                    |
| SEMA6D | 80031  | semaphorin 6D                                 | -                                                                                                         |
| SEMA7A | 8482   | semaphorin 7A (John Milton Hagen blood group) | CD108 CDw108 H-SEMA-K1 H-Sema-L JMH SEMAK1 SEMAL                                                          |
| SLIT1  | 6585   | slit guidance ligand 1                        | MEGF4 SLIL1 SLIT-1 SLIT3                                                                                  |
| SLIT2  | 9353   | slit guidance ligand 2                        | SLIL3 Slit-2                                                                                              |

|         |       |                                     |                                                                                        |
|---------|-------|-------------------------------------|----------------------------------------------------------------------------------------|
| TNC     | 3371  | tenascin C                          | 150-225 DFNA56 GMEM GP HXB JI TN TN-C                                                  |
| TYMP    | 1890  | thymidine phosphorylase             | ECGF ECGF1 MEDPS1 MNGIE MTDPS1 PDECGF TP hPD-ECGF                                      |
| XCL1    | 6375  | X-C motif chemokine ligand 1        | ATAC LPTN LTN SCM-1 SCM-1a SCM1 SCM1A SCYC1                                            |
| XCL2    | 6846  | X-C motif chemokine ligand 2        | SCM-1b SCM1B SCYC2                                                                     |
| C5AR1   | 728   | complement C5a receptor 1           | C5A C5AR C5R1 CD88                                                                     |
| ACKR2   | 1238  | atypical chemokine receptor 2       | CCBP2 CCR10 CCR9 CMKBR9 D6 hD6                                                         |
| CCR1    | 1230  | C-C motif chemokine receptor 1      | CD191 CKR-1 CKR1 CMKBR1 HM145 MIP1aR SCYAR1                                            |
| CCR10   | 2826  | C-C motif chemokine receptor 10     | GPR2                                                                                   |
| CCR3    | 1232  | C-C motif chemokine receptor 3      | C C CKR3 CC-CKR-3 CD193 CKR3 CKR3 CMKBR3                                               |
| CCR4    | 1233  | C-C motif chemokine receptor 4      | CC-CKR-4 CD194 CKR4 CMKBR4 ChemR13 HGCN:14099 K5-5                                     |
| CCR5    | 1234  | C-C motif chemokine receptor 5      | CC-CKR-5 CCCKR5 CCR-5 CD195 CKR-5 CKR5 CMKBR5 IDDM22                                   |
| CCR6    | 1235  | C-C motif chemokine receptor 6      | BN-1 C-C CKR-6 CC-CKR-6 CCR-6 CD196 CKR-L3 CKRL3 CMKBR6 DCR2 DRY6 GPR29 GPRCY4 STRL22  |
| CCR7    | 1236  | C-C motif chemokine receptor 7      | BLR2 CC-CKR-7 CCR-7 CD197 CDw197 CMKBR7 EBI1                                           |
| CCR8    | 1237  | C-C motif chemokine receptor 8      | CC-CKR-8 CCR-8 CDw198 CKRL1 CMKBR8 CMKBRL2 CY6 GPRCY6 TER1                             |
| CCR9    | 10803 | C-C motif chemokine receptor 9      | CC-CKR-9 CDw199 GPR-9-6 GPR28                                                          |
| ACKR4   | 51554 | atypical chemokine receptor 4       | CC-CKR-11 CCBP2 CCR-11 CCR10 CCR11 CCRL1 CCXCKR CCX-CKR CKR-11 PPR1 VSHK1              |
| CCRL2   | 9034  | C-C motif chemokine receptor like 2 | ACKR5 CKRX CRAM CRAM-A CRAM-B HCR                                                      |
| CMKLR1  | 1240  | chemerin chemokine-like receptor 1  | CHEMERINR ChemR23 DEZ RVER1                                                            |
| CX3CR1  | 1524  | C-X3-C motif chemokine receptor 1   | CCRL1 CMKBRL1 CMKDR1 GPR13 GPRV28 V28                                                  |
| CXCR3   | 2833  | C-X-C motif chemokine receptor 3    | CD182 CD183 CKR-L2 CMKAR3 GPR9 IP10-R Mig-R MigR                                       |
| CXCR4   | 7852  | C-X-C motif chemokine receptor 4    | CD184 D2S201E FB22 HM89 HSY3RR LAP-3 LAP3 LCR1 LESTR NPY3R NPYR NPYR NPYY3R WHIM WHIMS |
| CXCR5   | 643   | C-X-C motif chemokine receptor 5    | BLR1 CD185 MDR15                                                                       |
| CXCR6   | 10663 | C-X-C motif chemokine receptor 6    | BONZO CD186 STRL33 TYMSTR                                                              |
| ACKR3   | 57007 | atypical chemokine receptor 3       | CMKOR1 CXC-R7 CXCR-7 CXCR7 GPR159 RDC-1 RDC1                                           |
| CYSLTR1 | 10800 | cysteinyl leukotriene receptor 1    | CYSLT1 CYSLT1R CYSLTR HMTMF81                                                          |

|         |       |                                                   |                                                                   |
|---------|-------|---------------------------------------------------|-------------------------------------------------------------------|
| CYSLTR2 | 57105 | cysteinyl leukotriene receptor 2                  | CYSLT2 CYSLT2R GPCR21 HG57 HPN321 KPG_011 PSEC0146 hGPCR21        |
| ACKR1   | 2532  | atypical chemokine receptor 1 (Duffy blood group) | CCBP1 CD234 DARC DARC/ACKR1 Dfy FY GPD GpFy WBCQ1                 |
| EDNRA   | 1909  | endothelin receptor type A                        | ET-A ETA ETA-R ETAR ETRA MFDA hET-AR                              |
| EDNRB   | 1910  | endothelin receptor type B                        | ABCDs ET-B ET-BR ETB ETB1 ETBR ETRB HSCR HSCR2 WS4A               |
| FPR1    | 2357  | formyl peptide receptor 1                         | FMLP FPR                                                          |
| FPR2    | 2358  | formyl peptide receptor 2                         | ALXR FMLP-R-I FMLPX FPR2A FPRH1 FPRH2 FPRL1 HM63 LXA4R            |
| FPR2    | 2358  | formyl peptide receptor 2                         | ALXR FMLP-R-I FMLPX FPR2A FPRH1 FPRH2 FPRL1 HM63 LXA4R            |
| GPR17   | 2840  | G protein-coupled receptor 17                     | -                                                                 |
| GPR32   | 2854  | G protein-coupled receptor 32                     | RVDR1                                                             |
| GPR33   | 2856  | G protein-coupled receptor 33                     | -                                                                 |
| PTGDR2  | 11251 | prostaglandin D2 receptor 2                       | CD294 CRTH2 DL1R DP2 GPR44                                        |
| C5AR2   | 27202 | complement component 5a receptor 2                | C5L2 GPF77 GPR77                                                  |
| CXCR1   | 3577  | C-X-C motif chemokine receptor 1                  | C-C C-C-CKR-1 CD128 CD181 CDw128a CKR-1 CMKAR1 IL8R1 IL8RA IL8RBA |
| CXCR2   | 3579  | C-X-C motif chemokine receptor 2                  | CD182 CDw128b CMKAR2 IL8R2 IL8RA IL8RB                            |
| LTB4R   | 1241  | leukotriene B4 receptor                           | BLT1 BLTR CMKRL1 GPR16 LTB4R1 LTBR1 P2RY7 P2Y7                    |
| LTB4R2  | 56413 | leukotriene B4 receptor 2                         | BLT2 BLTR2 JULF2 KPG_004 LTB4-R2 LTB4-R2 NOP9                     |
| PLAUR   | 5329  | plasminogen activator, urokinase receptor         | CD87 U-PAR UPAR URKR                                              |
| PLXNA1  | 5361  | plexin A1                                         | NOV NOVP PLEXIN-A1 PLXN1                                          |
| PLXNA2  | 5362  | plexin A2                                         | OCT PLXN2                                                         |
| PLXNA3  | 55558 | plexin A3                                         | 6.3 HSSEXGENE PLXN3 PLXN4 XAP-6                                   |
| PLXNA4  | 91584 | plexin A4                                         | FAYV2820 PLEXA4 PLXNA4A PLXNA4B PRO34003                          |
| PLXNB1  | 5364  | plexin B1                                         | PLEXIN-B1 PLXN5 SEP                                               |
| PLXNB2  | 23654 | plexin B2                                         | MM1 Nbla00445 PLEXB2 dJ402G11.3                                   |
| PLXNB3  | 5365  | plexin B3                                         | PLEXB3 PLEXR PLXN6                                                |
| PLXNC1  | 10154 | plexin C1                                         | CD232 PLXN-C1 VESPR                                               |
| PLXND1  | 23129 | plexin D1                                         | PLEXD1                                                            |
| PTAFR   | 5724  | platelet activating factor receptor               | PAFR                                                              |
| ROBO1   | 6091  | roundabout guidance receptor 1                    | DUTT1 SAX3                                                        |
| ROBO2   | 6092  | roundabout guidance receptor 2                    | SAX3                                                              |
| ROBO3   | 64221 | roundabout guidance receptor 3                    | HGPPS HGPPS1 HGPS RBIG1 RIG1                                      |
| RXFP3   | 51289 | relaxin family peptide receptor 3                 | GPCR135 RLN3R1 RXFFR3 SALPR                                       |
| XCR1    | 2829  | X-C motif chemokine receptor 1                    | CCXCR1 GPR5                                                       |
| ADIPOQ  | 9370  | adiponectin, C1Q and collagen domain containing   | ACDC ACRP30 ADIPQTL1 ADPN APM-1 APM1 GBP28                        |
| ADM     | 133   | adrenomedullin                                    | AM PAMP                                                           |
| ADM2    | 79924 | adrenomedullin 2                                  | AM2 dJ579N16.4                                                    |
| AGRP    | 181   | agouti related neuropeptide                       | AGRT ART ASIP2                                                    |

|             |        |                                                     |                                                                                       |
|-------------|--------|-----------------------------------------------------|---------------------------------------------------------------------------------------|
| AGT         | 183    | angiotensinogen                                     | ANHU SERPINA8 hFLT1                                                                   |
| AMBN        | 258    | ameloblastin                                        | A11F                                                                                  |
| AMELX       | 265    | amelogenin X-linked                                 | A11E AIH1 ALGN AMG AMGL AMGX                                                          |
| AMH         | 268    | anti-Mullerian hormone                              | MIF MIS                                                                               |
| ANGPTL5     | 253935 | angiopoietin like 5                                 | -                                                                                     |
| ANGPTL7     | 10218  | angiopoietin like 7                                 | AngX CDT6 dJ647M16.1                                                                  |
| APLN        | 8862   | apelin                                              | APEL XNPEP2                                                                           |
| AREG        | 374    | amphiregulin                                        | AR AREGB CRDGF SDGF                                                                   |
| MANF        | 7873   | mesencephalic astrocyte derived neurotrophic factor | ARMET ARP                                                                             |
| CDNF        | 441549 | cerebral dopamine neurotrophic factor               | ARMETL1                                                                               |
| ARTN        | 9048   | artemin                                             | ART ENOVIN EVN NBN                                                                    |
| AVP         | 551    | arginine vasopressin                                | ADH ARVP AVP-NPII AVRP VP                                                             |
| AZU1        | 566    | azurocidin 1                                        | AZAMP AZU CAP37 HBP HUMAZUR NAZC hHBP                                                 |
| BDNF        | 627    | brain derived neurotrophic factor                   | ANON2 BULN2                                                                           |
| BMP1        | 649    | bone morphogenetic protein 1                        | OI13 PCOLC PCP PCP2 TLD                                                               |
| BMP10       | 27302  | bone morphogenetic protein 10                       | -                                                                                     |
| BMP15       | 9210   | bone morphogenetic protein 15                       | GDF9B ODG2 POF4                                                                       |
| BMP2        | 650    | bone morphogenetic protein 2                        | BDA2 BMP2A SSFSC                                                                      |
| BMP3        | 651    | bone morphogenetic protein 3                        | BMP-3A                                                                                |
| BMP4        | 652    | bone morphogenetic protein 4                        | BMP2B BMP2B1 MCOPS6 OFC11 ZYME                                                        |
| BMP5        | 653    | bone morphogenetic protein 5                        | -                                                                                     |
| BMP6        | 654    | bone morphogenetic protein 6                        | VGR VGR1                                                                              |
| BMP7        | 655    | bone morphogenetic protein 7                        | OP-1                                                                                  |
| BMP8A       | 353500 | bone morphogenetic protein 8a                       | OP-2                                                                                  |
| BMP8B       | 656    | bone morphogenetic protein 8b                       | BMP8 OP2                                                                              |
| BTC         | 685    | betacellulin                                        | -                                                                                     |
| MYDGF       | 56005  | myeloid derived growth factor                       | C19orf10 EUROIMAGE1875335 IL25 IL27 IL27w R33729_1 SF20                               |
| C3          | 718    | complement C3                                       | AHUS5 ARMD9 ASP C3a C3b CPAMD1 HEL-S-62p                                              |
| C5          | 727    | complement C5                                       | C5D C5a C5b CPAMD4 ECLZB                                                              |
| CALCA       | 796    | calcitonin related polypeptide alpha                | CALC1 CGRP CGRP-I CGRP-alpha CGRP1 CT KC PCT                                          |
| CALCB       | 797    | calcitonin related polypeptide                      | CALC2 CGRP-III CGRP2                                                                  |
| CAMP        | 820    | cathelicidin antimicrobial peptide                  | CAP-18 CAP18 CRAMP FALL-39 FALL39 HSD26 LL37                                          |
| CAT         | 847    | catalase                                            | -                                                                                     |
| CCK         | 885    | cholecystokinin                                     | -                                                                                     |
| CCL1        | 6346   | C-C motif chemokine ligand 1                        | I-309 P500 SCYA1 SISe TCA3                                                            |
| CCL11       | 6356   | C-C motif chemokine ligand 11                       | SCYA11                                                                                |
| CCL13       | 6357   | C-C motif chemokine ligand 13                       | CKb10 MCP-4 NCC-1 NCC1 SCYA13 SCYL1                                                   |
| CCL14       | 6358   | C-C motif chemokine ligand 14                       | CC-1 CC-3 CKB1 HCC-1 HCC-1(1-74) HCC-1/HCC-3 HCC-3 MCIF NCC-2 NCC2 SCYA14 SCYL2 SY14  |
| CCL15-CCL14 | 348249 | CCL15-CCL14 readthrough (NMD candidate)             | CCL15 HCC-2 LKN-1 MIP-5 MIP5 Mrp-2b NCC-3 NCC3 SCYA15                                 |
| CCL15       | 6359   | C-C motif chemokine ligand 15                       | HCC-2 HMRP-2B LKN-1 LKN1 MIP-1 delta MIP-1D MIP-5 MRP-2B NCC-3 NCC3 SCYA15 SCYL3 SY15 |

|        |        |                                           |                                                                            |
|--------|--------|-------------------------------------------|----------------------------------------------------------------------------|
| CCL16  | 6360   | C-C motif chemokine ligand 16             | CKb12 HCC-4 LINCK LCC-1 LEC LMC Mtn-1 NCC-4 NCC4 SCYA16 SCYL4              |
| CCL17  | 6361   | C-C motif chemokine ligand 17             | A-152E5.3 ABCD-2 SCYA17 TARC                                               |
| CCL18  | 6362   | C-C motif chemokine ligand 18             | AMAC-1 AMAC1 CKb7 DC-CK1 DCCK1 MIP-4 PARC SCYA18                           |
| CCL19  | 6363   | C-C motif chemokine ligand 19             | CKb11 ELC MIP-3b MIP3B SCYA19                                              |
| CCL2   | 6347   | C-C motif chemokine ligand 2              | GDCF-2 HC11 HSMCR30 MCAF MCP-1 MCP1 SCYA2 SMC-CF                           |
| CCL20  | 6364   | C-C motif chemokine ligand 20             | CKb4 Exodus LARC MIP-3-alpha MIP-3a MIP3A SCYA20 ST38                      |
| CCL21  | 6366   | C-C motif chemokine ligand 21             | 6Ckine CKb9 ECL SCYA21 SLC TCA4                                            |
| CCL22  | 6367   | C-C motif chemokine ligand 22             | A-152E5.1 ABCD-1 DC/B-CK MDC SCYA22 STCP-1                                 |
| CCL23  | 6368   | C-C motif chemokine ligand 23             | CK-BETA-8 CKb8 Ckb-8 Ckb-8-1 MIP-3 MIP3 MPIF-1 SCYA23 hmrp-2a              |
| CCL24  | 6369   | C-C motif chemokine ligand 24             | Ckb-6 MPIF-2 MPIF2 SCYA24                                                  |
| CCL25  | 6370   | C-C motif chemokine ligand 25             | Ckb15 SCYA25 TECK                                                          |
| CCL26  | 10344  | C-C motif chemokine ligand 26             | IMAC MIP-4a MIP-4alpha SCYA26 TSC-1                                        |
| CCL27  | 10850  | C-C motif chemokine ligand 27             | ALP CTACK CTAK ESKINE ILC PESKY SCYA27                                     |
| CCL28  | 56477  | C-C motif chemokine ligand 28             | CCK1 MEC SCYA28                                                            |
| CCL3   | 6348   | C-C motif chemokine ligand 3              | G0S19-1 LD78ALPHA MIP-1-alpha MIP1A SCYA3                                  |
| CCL3L1 | 6349   | C-C motif chemokine ligand 3 like 1       | 464.2 D17S1718 G0S19-2 LD78 LD78-beta(1-70) LD78BETA MIP1AP SCYA3L SCYA3L1 |
| CCL3P1 | 390788 | C-C motif chemokine ligand 3 pseudogene 1 | CCL3L2 G0S19-3 LD78gamma SCYA3L2                                           |
| CCL3L3 | 414062 | C-C motif chemokine ligand 3 like 3       | 464.2 D17S1718 G0S19-2 LD78 LD78BETA SCYA3L SCYA3L1                        |
| CCL4   | 6351   | C-C motif chemokine ligand 4              | ACT2 AT744.1 G-26 HC21 LAG-1 LAG1 MIP-1-beta MIP1B MIP1B1 SCYA2 SCYA4      |
| CCL4L2 | 9560   | C-C motif chemokine ligand 4 like 2       | AT744.2 CCL4L SCYA4L SCYQ4L2                                               |
| CCL4L1 | 388372 | C-C motif chemokine ligand 4 like 1       | AT744.2 CCL4L LAG-1 LAG1 MIP-1-beta SCYA4L SCYA4L1 SCYA4L2                 |
| CCL5   | 6352   | C-C motif chemokine ligand 5              | D17S136E RANTES SCYA5 SIS-delta SISd TCP228 eoCP                           |
| CCL7   | 6354   | C-C motif chemokine ligand 7              | FIC MARC MCP-3 MCP3 NC28 SCYA6 SCYA7                                       |
| CCL8   | 6355   | C-C motif chemokine ligand 8              | HC14 MCP-2 MCP2 SCYA10 SCYA8                                               |
| CD320  | 51293  | CD320 molecule                            | 8D6 8D6A TCBLR TCN2R                                                       |
| CD40LG | 959    | CD40 ligand                               | CD154 CD40L HIGM1 IGM IMD3 T-BAM TNFSF5 TRAP gp39 hCD40L                   |
| CD70   | 970    | CD70 molecule                             | CD27-L CD27L CD27LG LPFS3 TNFSF7 TNLG8A                                    |
| ADA2   | 51816  | adenosine deaminase 2                     | ADGF CECR1 IDGFL PAN SNEDS VAIH S                                          |
| CER1   | 9350   | cerberus 1, DAN family BMP antagonist     | DAND4                                                                      |

|         |        |                                                    |                                            |
|---------|--------|----------------------------------------------------|--------------------------------------------|
| CGA     | 1081   | glycoprotein hormones, alpha polypeptide           | CG-ALPHA FSHA GPA1 GPHA1 GPHa HCG LHA TSHA |
| CGB3    | 1082   | chorionic gonadotropin subunit beta 3              | CGB CGB5 CGB7 CGB8 hCGB                    |
| CGB1    | 114335 | chorionic gonadotropin subunit beta 1              | -                                          |
| CGB2    | 114336 | chorionic gonadotropin subunit beta 2              | -                                          |
| CGB5    | 93659  | chorionic gonadotropin subunit beta 5              | CGB HCG hCGB                               |
| CGB7    | 94027  | chorionic gonadotropin subunit beta 7              | CG-beta-a CGB6                             |
| CGB8    | 94115  | chorionic gonadotropin subunit beta 8              | -                                          |
| CHGA    | 1113   | chromogranin A                                     | CGA                                        |
| CHGB    | 1114   | chromogranin B                                     | SCG1                                       |
| CKLF    | 51192  | chemokine like factor                              | C32 CKLF1 CKLF2 CKLF3 CKLF4 HSPC224 UCK-1  |
| CLCF1   | 23529  | cardiotrophin like cytokine factor 1               | BSF-3 BSF3 CISS2 CLC NNT-1 NNT1 NR6        |
| CLEC11A | 6320   | C-type lectin domain containing 11A                | CLECSF3 LSLCL P47 SCGF                     |
| CMA1    | 1215   | chymase 1                                          | CYH MCT1 chymase                           |
| CMTM1   | 113540 | CKLF like MARVEL transmembrane domain containing 1 | CKLFH CKLFH1 CKLFSF1                       |
| CMTM2   | 146225 | CKLF like MARVEL transmembrane domain containing 2 | CKLFSF2                                    |
| CMTM3   | 123920 | CKLF like MARVEL transmembrane domain containing 3 | BNAS2 CKLFSF3                              |
| CMTM4   | 146223 | CKLF like MARVEL transmembrane domain containing 4 | CKLFSF4                                    |
| CMTM5   | 116173 | CKLF like MARVEL transmembrane domain containing 5 | CKLFSF5                                    |
| CMTM6   | 54918  | CKLF like MARVEL transmembrane domain containing 6 | CKLFSF6 PRO2219                            |
| CMTM7   | 112616 | CKLF like MARVEL transmembrane domain containing 7 | CKLFSF7                                    |
| CMTM8   | 152189 | CKLF like MARVEL transmembrane domain containing 8 | CKLFSF8 CKLFSF8-V2                         |
| CNTF    | 1270   | ciliary neurotrophic factor                        | HCNTF                                      |
| CORT    | 1325   | cortistatin                                        | CST-14 CST-17 CST-29                       |
| CRH     | 1392   | corticotropin releasing hormone                    | CRF CRH1                                   |
| CSF1    | 1435   | colony stimulating factor 1                        | CSF-1 MCSF                                 |
| CSF2    | 1437   | colony stimulating factor 2                        | CSF GMCSF                                  |
| CSF3    | 1440   | colony stimulating factor 3                        | C17orf33 CSF3OS GCSF                       |

|          |        |                                            |                                                                 |
|----------|--------|--------------------------------------------|-----------------------------------------------------------------|
| CSH1     | 1442   | chorionic somatomammotropin hormone 1      | CS-1 CSA CSMT GHB3 PL hCS-1 hCS-A                               |
| CSH2     | 1443   | chorionic somatomammotropin hormone 2      | CS-2 CSB GHB1 PL hCS-B                                          |
| CSHL1    | 1444   | chorionic somatomammotropin hormone like 1 | CS-5 CSHP1 CSL GHB4 hCS-L                                       |
| CSPG5    | 10675  | chondroitin sulfate proteoglycan           | NGC                                                             |
| CTF1     | 1489   | cardiotrophin 1                            | CT-1 CT1                                                        |
| CCN2     | 1490   | cellular communication network factor 2    | CTGF HCS24 IGFBP8 NOV2                                          |
| CTSG     | 1511   | cathepsin G                                | CATG CG                                                         |
| CX3CL1   | 6376   | C-X3-C motif chemokine ligand 1            | ABCD-3 C3Xkine CXC3 CXC3C NTN NTT SCYD1 fractalkine neurotactin |
| CXCL1    | 2919   | C-X-C motif chemokine ligand 1             | FSP GRO1 GROa MGSA MGSA-a NAP-3 SCYB1                           |
| CXCL10   | 3627   | C-X-C motif chemokine ligand 10            | C7 IFI10 INP10 IP-10 SCYB10 crg-2 gIP-10 mob-1                  |
| CXCL11   | 6373   | C-X-C motif chemokine ligand 11            | H174 I-TAC IP-9 IP9 SCYB11 SCYB9B b-R1                          |
| CXCL12   | 6387   | C-X-C motif chemokine ligand 12            | IRH PBSF SCYB12 SDF1 TLSF TPAR1                                 |
| CXCL13   | 10563  | C-X-C motif chemokine ligand 13            | ANGIE ANGIE2 BCA-1 BCA1 BLC BLR1L SCYB13                        |
| CXCL14   | 9547   | C-X-C motif chemokine ligand 14            | BMAC BRAK KEC KS1 MIP-2g MIP2G NJAC SCYB14                      |
| CXCL16   | 58191  | C-X-C motif chemokine ligand 16            | CXCLG16 SR-PSOX SRPSOX                                          |
| CXCL17   | 284340 | C-X-C motif chemokine ligand 17            | DMC Dcip1 UNQ473 VCC-1 VCC1                                     |
| CXCL2    | 2920   | C-X-C motif chemokine ligand 2             | CINC-2a GRO2 GROb MGSA-b MIP-2a MIP2 MIP2A SCYB2                |
| CXCL3    | 2921   | C-X-C motif chemokine ligand 3             | CINC-2b GRO3 GROg MIP-2b MIP2B SCYB3                            |
| CXCL5    | 6374   | C-X-C motif chemokine ligand 5             | ENA-78 SCYB5                                                    |
| CXCL6    | 6372   | C-X-C motif chemokine ligand 6             | CKA-3 GCP-2 GCP2 SCYB6                                          |
| CXCL9    | 4283   | C-X-C motif chemokine ligand 9             | CMK Humig MIG SCYB9 crg-10                                      |
| CCN1     | 3491   | cellular communication network factor 1    | CYR61 GIG1 IGFBP10                                              |
| DEFA1    | 1667   | defensin alpha 1                           | DEF1 DEFA2 HNP-1 HP-1 HP1 MRS                                   |
| DEFA3    | 1668   | defensin alpha 3                           | DEF3 HNP-3 HNP3 HP-3 HP3                                        |
| DEFA5    | 1670   | defensin alpha 5                           | DEF5 HD-5                                                       |
| DEFB1    | 1672   | defensin beta 1                            | BD1 DEFB-1 DEFB101 HBD1                                         |
| DEFB103B | 55894  | defensin beta 103B                         | BD-3 DEFB-3 DEFB103 DEFB3 HBD-3 HBD3 HBP-3 HBP3                 |
| DEFB104A | 140596 | defensin beta 104A                         | BD-4 DEFB-4 DEFB104 DEFB4 hBD-4                                 |
| DEFB4A   | 1673   | defensin beta 4A                           | BD-2 DEFB-2 DEFB102 DEFB2 DEFB4 HBD-2 SAP1                      |
| DKK1     | 22943  | dickkopf WNT signaling pathway inhibitor 1 | DKK-1 SK                                                        |
| EBI3     | 10148  | Epstein-Barr virus induced 3               | IL-27B IL27B IL35B                                              |
| EDN1     | 1906   | endothelin 1                               | ARCND3 ET1 HDLCQ7 PPET1 QME                                     |
| EDN2     | 1907   | endothelin 2                               | ET-2 ET2 PPET2                                                  |
| EDN3     | 1908   | endothelin 3                               | ET-3 ET3 HSCR4 PPET3 WS4B                                       |
| EGF      | 1950   | epidermal growth factor                    | HOMG4 URG                                                       |
| EPGN     | 255324 | epithelial mitogen                         | ALGV3072 EPG PRO9904                                            |
| EPO      | 2056   | erythropoietin                             | DBAL ECYT5 EP MVCD2                                             |



|        |        |                                                 |                                                                           |
|--------|--------|-------------------------------------------------|---------------------------------------------------------------------------|
| EREG   | 2069   | epiregulin                                      | EPR ER Ep                                                                 |
| ESM1   | 11082  | endothelial cell specific molecule 1            | endocan                                                                   |
| FAM3B  | 54097  | FAM3 metabolism regulating signaling molecule B | 2-21 C21orf11 C21orf76 ORF9 PANDER PRED44                                 |
| FAM3C  | 10447  | FAM3 metabolism regulating signaling molecule C | GS3786 ILEI                                                               |
| FAM3D  | 131177 | FAM3 metabolism regulating signaling molecule D | EF7 OIT1                                                                  |
| FASLG  | 356    | Fas ligand                                      | ALPS1B APT1LG1 APTL CD178 CD95-L CD95L FASL TNFSF6 TNLG1A                 |
| FGF1   | 2246   | fibroblast growth factor 1                      | AFGF ECGF ECGF-beta ECGFA ECGFB FGF-1 FGF-alpha FGFA GLIO703 HBGF-1 HBGF1 |
| FGF10  | 2255   | fibroblast growth factor 10                     | -                                                                         |
| FGF11  | 2256   | fibroblast growth factor 11                     | FGF-11 FHF-3 FHF3                                                         |
| FGF12  | 2257   | fibroblast growth factor 12                     | EIEE47 FGF12B FHF1                                                        |
| FGF13  | 2258   | fibroblast growth factor 13                     | FGF-13 FGF2 FHF-2 FHF2 LINC00889                                          |
| FGF14  | 2259   | fibroblast growth factor 14                     | FGF-14 FHF-4 FHF4 SCA27                                                   |
| FGF16  | 8823   | fibroblast growth factor 16                     | FGF-16 MF4                                                                |
| FGF17  | 8822   | fibroblast growth factor 17                     | FGF-13 FGF-17 HH20                                                        |
| FGF18  | 8817   | fibroblast growth factor 18                     | FGF-18 ZFGF5                                                              |
| FGF19  | 9965   | fibroblast growth factor 19                     | -                                                                         |
| FGF2   | 2247   | fibroblast growth factor 2                      | BFGF FGF-2 FGFB HBGF-2                                                    |
| FGF20  | 26281  | fibroblast growth factor 20                     | FGF-20 RHDA2                                                              |
| FGF21  | 26291  | fibroblast growth factor 21                     | -                                                                         |
| FGF22  | 27006  | fibroblast growth factor 22                     | -                                                                         |
| FGF23  | 8074   | fibroblast growth factor 23                     | ADHR FGFN HFTC2 HPDR2 HYPF PHPTC                                          |
| FGF3   | 2248   | fibroblast growth factor 3                      | HBGF-3 INT2                                                               |
| FGF4   | 2249   | fibroblast growth factor 4                      | FGF-4 HBGF-4 HST HST-1 HSTF-1 HSTF1 K-FGF KFGF                            |
| FGF5   | 2250   | fibroblast growth factor 5                      | HBGF-5 Smag-82 TCMGLY                                                     |
| FGF6   | 2251   | fibroblast growth factor 6                      | HBGF-6 HST2                                                               |
| FGF7   | 2252   | fibroblast growth factor 7                      | HBGF-7 KGF                                                                |
| FGF8   | 2253   | fibroblast growth factor 8                      | AIGF FGF-8 HBGF-8 HH6 KAL6                                                |
| FGF9   | 2254   | fibroblast growth factor 9                      | FGF-9 GAF HBFG-9 HBGF-9 SYNS3                                             |
| VEGFD  | 2277   | vascular endothelial growth factor D            | FIGF VEGF-D                                                               |
| FIGNL2 | 401720 | fidgetin like 2                                 | -                                                                         |
| FLT3LG | 2323   | fms related receptor tyrosine kinase 3 ligand   | FL FLG3L FLT3L                                                            |
| FSHB   | 2488   | follicle stimulating hormone subunit beta       | HH24                                                                      |
| GAL    | 51083  | galanin and GMAP prepropeptide                  | ETL8 GAL-GMAP GALN GLNN GMAP                                              |
| GALP   | 85569  | galanin like peptide                            | -                                                                         |
| GAST   | 2520   | gastrin                                         | GAS                                                                       |
| GCG    | 2641   | glucagon                                        | GLP-1 GLP1 GLP2 GRPP                                                      |
| GDF1   | 2657   | growth differentiation factor 1                 | CERS1 CHTD6 DORV DTGA3 LAG1 LAS1 RAI UOG1                                 |
| GDF10  | 2662   | growth differentiation factor 10                | BIP BMP-3b BMP3B                                                          |
| GDF11  | 10220  | growth differentiation factor 11                | BMP-11 BMP11                                                              |

|        |        |                                        |                                                                                  |
|--------|--------|----------------------------------------|----------------------------------------------------------------------------------|
| GDF15  | 9518   | growth differentiation factor 15       | GDF-15 MIC-1 MIC1 NAG-1 PDF PLAB PTGFB                                           |
| GDF2   | 2658   | growth differentiation factor 2        | BMP-9 BMP9 HHT5                                                                  |
| GDF3   | 9573   | growth differentiation factor 3        | KFS3 MCOP7 MCOPCB6                                                               |
| GDF5   | 8200   | growth differentiation factor 5        | BDA1C BMP-14 BMP14 CDMP1 DUPANS LAP-4 LAP4 OS5 SYM1B SYNS2                       |
| GDF6   | 392255 | growth differentiation factor 6        | BMP-13 BMP13 CDMP2 KFM KFS KFS1 KFSL SGM1 SYNS4                                  |
| GDF7   | 151449 | growth differentiation factor 7        | BMP12                                                                            |
| GDF9   | 2661   | growth differentiation factor 9        | POF14                                                                            |
| GDNF   | 2668   | glial cell derived neurotrophic factor | ATF ATF1 ATF2 HFB1-GDNF HSCR3                                                    |
| GH1    | 2688   | growth hormone 1                       | GH GH-N GHB5 GHN IGHD1A IGHD1B IGHD2 hGH-N                                       |
| GH2    | 2689   | growth hormone 2                       | GH-V GHB2 GHL GHV hGH-V                                                          |
| GHRH   | 2691   | growth hormone releasing hormone       | GHRF GRF INN                                                                     |
| GHRL   | 51738  | ghrelin and obestatin prepropeptide    | MTLRP                                                                            |
| GIP    | 2695   | gastric inhibitory polypeptide         | -                                                                                |
| GKN1   | 56287  | gastrokine 1                           | AMP18 BRICD1 CA11 FOV foveolin                                                   |
| GMFB   | 2764   | glia maturation factor beta            | GMF                                                                              |
| GMFG   | 9535   | glia maturation factor gamma           | GMF-GAMMA                                                                        |
| GNRH1  | 2796   | gonadotropin releasing hormone 1       | GNRH GRH LHRH LNRH                                                               |
| GNRH2  | 2797   | gonadotropin releasing hormone 2       | GnRH-II LH-RHII                                                                  |
| GPHA2  | 170589 | glycoprotein hormone subunit alpha 2   | A2 GPA2 ZSIG51                                                                   |
| GPHB5  | 122876 | glycoprotein hormone subunit beta 5    | B5 GPB5 ZLUT1                                                                    |
| GPI    | 2821   | glucose-6-phosphate isomerase          | AMF GNPI NLK PGI PHI SA-36 SA36                                                  |
| GREM1  | 26585  | gremlin 1, DAN family BMP antagonist   | C15DUPq CKTSF1B1 CRAC1 CRCS4 DAND2 DRM DUP15q GREMLIN HMPS HMPS1 IHG-2 MPSH PIG2 |
| GREM2  | 64388  | gremlin 2, DAN family BMP antagonist   | CKTSF1B2 DAND3 PRDC STHAG9                                                       |
| GRN    | 2896   | granulin precursor                     | CLN11 GEP GP88 PCDGF PEPI PGRN                                                   |
| GRP    | 2922   | gastrin releasing peptide              | BN GRP-10 preproGRP proGRP                                                       |
| GUCA2A | 2980   | guanylate cyclase activator 2A         | GCAP-I GUCA2 STARA                                                               |
| HAMP   | 57817  | hepcidin antimicrobial peptide         | HEPC HFE2B LEAP1 PLTR                                                            |
| HBEGF  | 1839   | heparin binding EGF like growth factor | DTR DTS DTSF HEGFL                                                               |
| HDGF   | 3068   | heparin binding growth factor          | HMG1L2                                                                           |
| HDGFL3 | 50810  | HDGF like 3                            | CGI-142 HDGF-2 HDGF2 HDGFRP3 HRP-3                                               |
| HGF    | 3082   | hepatocyte growth factor               | DFNB39 F-TCF HGFB HPTA SF                                                        |
| HTN3   | 3347   | histatin 3                             | HIS2 HTN2 HTN5 PB                                                                |
| IAPP   | 3375   | islet amyloid polypeptide              | DAP IAP                                                                          |
| IFNA1  | 3439   | interferon alpha 1                     | IFL IFN IFN-ALPHA IFN-alphaD IFNA13 IFNA@ leIF D                                 |

|        |        |                                    |                                                                               |
|--------|--------|------------------------------------|-------------------------------------------------------------------------------|
| IFNA10 | 3446   | interferon alpha 10                | IFN-alphaC                                                                    |
| IFNA13 | 3447   | interferon alpha 13                | -                                                                             |
| IFNA14 | 3448   | interferon alpha 14                | IFN-alphaH LEIF2H                                                             |
| IFNA16 | 3449   | interferon alpha 16                | IFN-alpha-16 IFN-alphaO                                                       |
| IFNA17 | 3451   | interferon alpha 17                | IFN-alphaI IFNA INFA LEIF2C1                                                  |
| IFNA2  | 3440   | interferon alpha 2                 | IFN-alpha-2 IFN-alphaA IFNA IFNA2B leIF A                                     |
| IFNA21 | 3452   | interferon alpha 21                | IFN-alphaI leIF F leIF-F                                                      |
| IFNA4  | 3441   | interferon alpha 4                 | IFN-alpha4a INFA4                                                             |
| IFNA5  | 3442   | interferon alpha 5                 | IFN-alpha-5 IFN-alphaG INA5 INFA5 leIF G                                      |
| IFNA6  | 3443   | interferon alpha 6                 | IFN-alphaK                                                                    |
| IFNA7  | 3444   | interferon alpha 7                 | IFN-alphaJ IFNA-J                                                             |
| IFNA8  | 3445   | interferon alpha 8                 | IFN-alphaB                                                                    |
| IFNB1  | 3456   | interferon beta 1                  | IFB IFF IFN-beta IFNB                                                         |
| IFNE   | 338376 | interferon epsilon                 | IFN-E IFNE1 IFNT1 INFE1 PRO655                                                |
| IFNG   | 3458   | interferon gamma                   | IFG IFI                                                                       |
| IFNK   | 56832  | interferon kappa                   | IFNT1 INFE1                                                                   |
| IFNW1  | 3467   | interferon omega 1                 | -                                                                             |
| IGF1   | 3479   | insulin like growth factor 1       | IGF IGF-I IGF MGF                                                             |
| IGF2   | 3481   | insulin like growth factor 2       | C11orf43 GRDF IGF-II PP9974                                                   |
| IL10   | 3586   | interleukin 10                     | CSIF GVHDS IL-10 IL10A TGIF                                                   |
| IL11   | 3589   | interleukin 11                     | AGIF IL-11                                                                    |
| IL12A  | 3592   | interleukin 12A                    | CLMF IL-12A NFSK NKSF1 P35                                                    |
| IL12B  | 3593   | interleukin 12B                    | CLMF CLMF2 IL-12B IMD28 IMD29 NKSF NKSF2                                      |
| IL13   | 3596   | interleukin 13                     | IL-13 P600                                                                    |
| IL15   | 3600   | interleukin 15                     | IL-15                                                                         |
| IL16   | 3603   | interleukin 16                     | LCF NIL16 PRIL16 prIL-16                                                      |
| IL17A  | 3605   | interleukin 17A                    | CTLA-8 CTLA8 IL-17 IL-17A IL17                                                |
| IL17B  | 27190  | interleukin 17B                    | IL-17B IL-20 NIRF ZCYTO7                                                      |
| IL17C  | 27189  | interleukin 17C                    | CX2 IL-17C                                                                    |
| IL17D  | 53342  | interleukin 17D                    | IL-17D                                                                        |
| IL17F  | 112744 | interleukin 17F                    | CANDF6 IL-17F ML-1 ML1                                                        |
| IL18   | 3606   | interleukin 18                     | IGIF IL-18 IL-1g IL1F4                                                        |
| IL19   | 29949  | interleukin 19                     | IL-10C MDA1 NG.1 ZMDA1                                                        |
| IL1A   | 3552   | interleukin 1 alpha                | IL-1 alpha IL-1A IL1 IL1-ALPHA IL1F1                                          |
| IL1B   | 3553   | interleukin 1 beta                 | IL-1 IL1-BETA IL1F2 IL1beta                                                   |
| IL1F10 | 84639  | interleukin 1 family member 10     | FIL1-theta FKSG75 IL-1HY2 IL-38 IL1-theta IL1HY2                              |
| IL36RN | 26525  | interleukin 36 receptor antagonist | FIL1 FIL1(DELTA) FIL1D IL-36Ra IL1F5 IL1HY1 IL1L1 IL1RP3 IL36RA PSORP PSORS14 |
| IL36A  | 27179  | interleukin 36 alpha               | FIL1 FIL1(EPSILON) FIL1E IL-1F6 IL1(EPSILON) IL1F6                            |
| IL37   | 27178  | interleukin 37                     | FIL1 FIL1(ZETA) FIL1Z IL-1F7 IL-1H IL-1H4 IL-1RP1 IL-37 IL1F7 IL1H4 IL1RP1    |
| IL36B  | 27177  | interleukin 36 beta                | FIL1 FIL1-(ETA) FIL1H FILI-(ETA) IL-1F8 IL-1H2 IL1-ETA IL1F8 IL1H2            |
| IL36G  | 56300  | interleukin 36 gamma               | IL-1F9 IL-1H1 IL-1RP2 IL1E IL1F9 IL1H1 IL1RP2                                 |
| IL1RN  | 3557   | interleukin 1 receptor antagonist  | DIRA ICIL-1RA IL-1RN IL-1ra IL-1ra3 IL1F3 IL1RA IRAP MVCD4                    |
| IL2    | 3558   | interleukin 2                      | IL-2 TCGF lymphokine                                                          |

|          |        |                                         |                                                                             |
|----------|--------|-----------------------------------------|-----------------------------------------------------------------------------|
| IL20     | 50604  | interleukin 20                          | IL-20 IL10D ZCYTO10                                                         |
| IL21     | 59067  | interleukin 21                          | CVID11 IL-21 Za11                                                           |
| IL22     | 50616  | interleukin 22                          | IL-21 IL-22 IL-D110 IL-TIF ILTIF TIFIL-23 TIFa zcyto18                      |
| IL23A    | 51561  | interleukin 23 subunit alpha            | IL-23 IL-23A IL23P19 P19 SGRF                                               |
| IL24     | 11009  | interleukin 24                          | C49A FISP IL10B MDA7 MOB5 ST16                                              |
| IL25     | 64806  | interleukin 25                          | IL17E                                                                       |
| IL26     | 55801  | interleukin 26                          | AK155 IL-26                                                                 |
| IL27     | 246778 | interleukin 27                          | IL-27 IL-27A IL27A IL27p28 IL30 p28                                         |
| IFNL2    | 282616 | interferon lambda 2                     | IL-28A IL28A                                                                |
| IFNL3    | 282617 | interferon lambda 3                     | IFN-lambda-3 IFN-lambda-4 IL-28B IL-28C IL28B IL28C                         |
| IFNL1    | 282618 | interferon lambda 1                     | IL-29 IL29                                                                  |
| IL3      | 3562   | interleukin 3                           | IL-3 MCGF MULTI-CSF                                                         |
| IL31     | 386653 | interleukin 31                          | IL-31                                                                       |
| IL32     | 9235   | interleukin 32                          | IL-32alpha IL-32beta IL-32delta IL-32gamma NK4 TAIF TAIFa TAIFb TAIFc TAIFd |
| IL33     | 90865  | interleukin 33                          | C9orf26 DVS27 IL1F11 NF-HEV NFEHEV                                          |
| IL34     | 146433 | interleukin 34                          | C16orf77 IL-34                                                              |
| IL4      | 3565   | interleukin 4                           | BCGF-1 BCGF1 BSF-1 BSF1 IL-4                                                |
| IL5      | 3567   | interleukin 5                           | EDF IL-5 TRF                                                                |
| IL6      | 3569   | interleukin 6                           | BSF-2 BSF2 CDF HGF HSF IFN-beta-2 IFNB2 IL-6                                |
| IL6ST    | 3572   | interleukin 6 signal transducer         | CD130 CDW130 GP130 HIES4 IL-6RB sGP130                                      |
| IL7      | 3574   | interleukin 7                           | IL-7                                                                        |
| CXCL8    | 3576   | C-X-C motif chemokine ligand 8          | GCP-1 GCP1 IL8 LECT LUCT LYNAP MDNCF MONAP NAF NAP-1 NAP1 SCYB8             |
| IL9      | 3578   | interleukin 9                           | HP40 IL-9 P40                                                               |
| INHA     | 3623   | inhibin subunit alpha                   | -                                                                           |
| INHBA    | 3624   | inhibin subunit beta A                  | EDF FRP                                                                     |
| INHBB    | 3625   | inhibin subunit beta B                  | -                                                                           |
| INHBC    | 3626   | inhibin subunit beta C                  | IHBC                                                                        |
| INHBE    | 83729  | inhibin subunit beta E                  | -                                                                           |
| INS      | 3630   | insulin                                 | IDDM IDDM1 IDDM2 ILPR IRDN MODY10 PNDM4                                     |
| INS-IGF2 | 723961 | INS-IGF2 readthrough                    | INSIGF                                                                      |
| INSL3    | 3640   | insulin like 3                          | RLF RLNL Iey-I-L                                                            |
| INSL4    | 3641   | insulin like 4                          | EPIL PLACENTIN                                                              |
| INSL5    | 10022  | insulin like 5                          | PRO182 UNQ156                                                               |
| INSL6    | 11172  | insulin like 6                          | RIF1                                                                        |
| JAG1     | 182    | jagged canonical Notch ligand 1         | AGS AGS1 AHD AWS CD339 DCHE HJ1 JAGL1                                       |
| JAG2     | 3714   | jagged canonical Notch ligand 2         | HJ2 SER2                                                                    |
| FGF7P6   | 387628 | fibroblast growth factor 7 pseudogene 6 | KGFLP1                                                                      |
| FGF7P3   | 654466 | fibroblast growth factor 7 pseudogene 3 | KGFLP2                                                                      |
| KITLG    | 4254   | KIT ligand                              | DCUA DFNA69 FPH2 FPHH KL-1 Kitl MGF SCF SF SHEP7 SLF                        |
| KL       | 9365   | klotho                                  | HFTC3                                                                       |

|        |        |                                                          |                                                                          |
|--------|--------|----------------------------------------------------------|--------------------------------------------------------------------------|
| LACRT  | 90070  | lacritin                                                 | -                                                                        |
| LECT2  | 3950   | leukocyte cell derived chemotaxin 2                      | chm-II chm2                                                              |
| LEFTY1 | 10637  | left-right determination factor 1                        | LEFTB LEFTYB                                                             |
| LEFTY2 | 7044   | left-right determination factor 2                        | EBAF LEFTA LEFTYA TGFB4                                                  |
| LEP    | 3952   | leptin                                                   | LEPD OB OBS                                                              |
| LHB    | 3972   | lutinizing hormone subunit beta                          | CGB4 HH23 LSH-B LSH-beta                                                 |
| LIF    | 3976   | LIF interleukin 6 family cytokine                        | CDF DIA HILDA MLPLI                                                      |
| LRSAM1 | 90678  | leucine rich repeat and sterile alpha motif containing 1 | CMT2P RIFLE TAL                                                          |
| LTA    | 4049   | lymphotoxin alpha                                        | LT TNFB TNFSF1 TNLG1E                                                    |
| LTB    | 4050   | lymphotoxin beta                                         | TNFC TNFSF3 TNLG1C p33                                                   |
| LTBP1  | 4052   | latent transforming growth factor beta binding protein 1 | -                                                                        |
| LTBP2  | 4053   | latent transforming growth factor beta binding protein 2 | C14orf141 GLC3D LTBP3 MSPKA MSTP031 WMS3                                 |
| LTBP3  | 4054   | latent transforming growth factor beta binding protein 3 | DASS GPHYSD3 LTBP-3 LTBP2 STHAG6 pp6425                                  |
| LTBP4  | 8425   | latent transforming growth factor beta binding protein 4 | ARCL1C LTBP-4 LTBP4L LTBP4S                                              |
| MDK    | 4192   | midkine                                                  | ARAP MK NEGF2                                                            |
| MIA    | 8190   | MIA SH3 domain containing                                | CD-RAP                                                                   |
| MIF    | 4282   | macrophage migration inhibitory factor                   | GIF GLIF MMIF                                                            |
| MLN    | 4295   | motilin                                                  | -                                                                        |
| MSTN   | 2660   | myostatin                                                | GDF8 MSLHP                                                               |
| NAMPT  | 10135  | nicotinamide phosphoribosyltransferase                   | 1110035O14Rik PBEF PBEF1 VF VISFA<br>TIN                                 |
| NDP    | 4693   | norrin cystine knot growth factor NDP                    | EVR2 FEVR ND                                                             |
| NENF   | 29937  | neudesin neurotrophic factor                             | CIR2 SCIRP10 SPUF                                                        |
| NGF    | 4803   | nerve growth factor                                      | Beta-NGF HSAN5 NGFB                                                      |
| NMB    | 4828   | neuromedin B                                             | -                                                                        |
| NODAL  | 4838   | nodal growth differentiation factor                      | HTX5                                                                     |
| CCN3   | 4856   | cellular communication network factor 3                  | IBP-9 IGFBP-9 IGFBP9 NOV NOVh                                            |
| NPFF   | 8620   | neuropeptide FF-amide peptide precursor                  | FMRFAL                                                                   |
| NPPA   | 4878   | natriuretic peptide A                                    | ANF ANP ATFB6 ATRST2 CDD CDD-ANF CDP PND                                 |
| NPPB   | 4879   | natriuretic peptide B                                    | BNP                                                                      |
| NPPC   | 4880   | natriuretic peptide C                                    | CNP CNP2                                                                 |
| NPY    | 4852   | neuropeptide Y                                           | PYY4                                                                     |
| NRG1   | 3084   | neuregulin 1                                             | ARIA GGF GGF2 HGL HRG HRG1 HRG<br>A MST131 MSTP131 NDF NRG1-<br>IT2 SMDF |
| NRG2   | 9542   | neuregulin 2                                             | DON1 HRG2 NTAK                                                           |
| NRG3   | 10718  | neuregulin 3                                             | HRG3 pro-NRG3                                                            |
| NRG4   | 145957 | neuregulin 4                                             | HRG4                                                                     |
| NRTN   | 4902   | neurturin                                                | NTN                                                                      |
| NTF3   | 4908   | neurotrophin 3                                           | HDNF NGF-2 NGF2 NT-3 NT3                                                 |
| NTF4   | 4909   | neurotrophin 4                                           | GLC10 GLC10 NT-4 NT-4/5 NT-<br>5 NT4 NT5 NTF5                            |
| NTS    | 4922   | neurotensin                                              | NMN-125 NN NT NT/N NTS1                                                  |

|        |        |                                               |                                                                                                           |
|--------|--------|-----------------------------------------------|-----------------------------------------------------------------------------------------------------------|
| NUDT6  | 11162  | nudix hydrolase 6                             | ASFGF2 FGF-AS FGF2AS GFG-1 GFG1                                                                           |
| OGN    | 4969   | osteoglycin                                   | OG OIF SLRR3A                                                                                             |
| OSGIN1 | 29948  | oxidative stress induced growth inhibitor 1   | BDGI OKL38                                                                                                |
| OSM    | 5008   | oncostatin M                                  | -                                                                                                         |
| OSTN   | 344901 | osteocrin                                     | MUSCLIN                                                                                                   |
| OXT    | 5020   | oxytocin/neurophysin I prepropeptide          | OT OT-NPI OXT-NPI                                                                                         |
| ENDOU  | 8909   | endonuclease, poly(U) specific                | P11 PP11 PRSS26                                                                                           |
| PDGFA  | 5154   | platelet derived growth factor subunit A      | PDGF-A PDGF1                                                                                              |
| PDGFB  | 5155   | platelet derived growth factor subunit B      | IBGC5 PDGF-2 PDGF2 SIS SSV c-sis                                                                          |
| PDGFC  | 56034  | platelet derived growth factor C              | FALLOTEIN SCDGF                                                                                           |
| PDGFD  | 80310  | platelet derived growth factor D              | IEGF MSTP036 SCDGF-B SCDGF-B                                                                              |
| PDGFRA | 5156   | platelet derived growth factor receptor alpha | CD140A PDGFR-2 PDGFR2                                                                                     |
| PDGFRB | 5159   | platelet derived growth factor receptor beta  | CD140B IBGC4 IMF1 JTK12 KOGS PDGFR PDGFR-1 PDGFR1 PENTT                                                   |
| PDGFRL | 5157   | platelet derived growth factor receptor like  | PDGRL PRLTS                                                                                               |
| PDYN   | 5173   | prodynorphin                                  | ADCA PENKB SCA23                                                                                          |
| PENK   | 5179   | proenkephalin                                 | PE PENK-A                                                                                                 |
| PF4    | 5196   | platelet factor 4                             | CXCL4 PF-4 SCYB4                                                                                          |
| PF4V1  | 5197   | platelet factor 4 variant 1                   | CXCL4L1 CXCL4V1 PF4-ALT PF4A SCYB4V1                                                                      |
| PGF    | 5228   | placental growth factor                       | D12S1900 PGFL PIGF PLGF PIGF-2 SHGC-10760                                                                 |
| PLAU   | 5328   | plasminogen activator, urokinase              | ATF BDPLT5 QPD UPA URK u-PA                                                                               |
| PMCH   | 5367   | pro-melanin concentrating hormone             | MCH ppMCH                                                                                                 |
| PNOC   | 5368   | prepronociceptin                              | N OFQ NOP OFQ PPNOC ppN OFQ                                                                               |
| POMC   | 5443   | proopiomelanocortin                           | ACTH CLIP LPH MSH NPP OB AIRH POC                                                                         |
| PPBP   | 5473   | pro-platelet basic protein                    | B-TG1 Beta-TG CTAP-III CTAP3 CTAPIII CXCL7 LA-PF4 LDGF MDGF NAP-2 PBP SCYB7 TC1 TC2 TGB TGB1 THBGB THBGB1 |
| PPBPP1 | 728045 | pro-platelet basic protein pseudogene 1       | PPBPL1 TGB2                                                                                               |
| PPBPP2 | 10895  | pro-platelet basic protein pseudogene 2       | PPBPL2 SPBPBP                                                                                             |
| PPY    | 5539   | pancreatic polypeptide                        | PNP PP                                                                                                    |
| PRL    | 5617   | prolactin                                     | GHA1                                                                                                      |
| PRLH   | 51052  | prolactin releasing hormone                   | PRH PRRP                                                                                                  |
| PROK1  | 84432  | prokineticin 1                                | EGVEGF PK1 PRK1                                                                                           |
| PROK2  | 60675  | prokineticin 2                                | BV8 HH4 KAL4 MIT1 PK2                                                                                     |
| PSPN   | 5623   | persephin                                     | PSP                                                                                                       |
| PTH    | 5741   | parathyroid hormone                           | FIH1 PTH1                                                                                                 |
| PTH2   | 113091 | parathyroid hormone 2                         | TIP39                                                                                                     |
| PTH LH | 5744   | parathyroid hormone like                      | BDE2 HHM PLP PTHR PTHRP                                                                                   |
| PTN    | 5764   | pleiotrophin                                  | HARP HB-GAM HBBM HBGF-8 HBGF8 HBNF HBNF-1 NEGF1 OSF-1                                                     |

|         |        |                                                                         |                                                                    |
|---------|--------|-------------------------------------------------------------------------|--------------------------------------------------------------------|
| PYY     | 5697   | peptide YY                                                              | PYY-I PYY1                                                         |
| QRFP    | 347148 | pyroglutamylated RFamide peptide                                        | 26RFa P518                                                         |
| RABEP1  | 9135   | rabaptin, RAB GTPase binding effector protein 1                         | RAB5EP RABPT5                                                      |
| RABEP2  | 79874  | rabaptin, RAB GTPase binding effector protein 2                         | FRA                                                                |
| REG1A   | 5967   | regenerating family member 1 alpha                                      | ICRF P19 PSP PSPS PSPS1 PTP REG                                    |
| RETN    | 56729  | resistin                                                                | ADSF FIZZ3 RETN1 RSTN XCP1                                         |
| RETNLB  | 84666  | resistin like beta                                                      | FIZZ1 FIZZ2 HXCP2 RELM-beta RELMb RELMbeta XCP2                    |
| RLN1    | 6013   | relaxin 1                                                               | H1 H1RLX RLXH1 bA12D24.3.1 bA12D24.3.2                             |
| RLN2    | 6019   | relaxin 2                                                               | H2 H2-RLX RLXH2 bA12D24.1.1 bA12D24.1.2                            |
| RLN3    | 117579 | relaxin 3                                                               | H3 RXN3 ZINS4 insl7                                                |
| RNASE2  | 6036   | ribonuclease A family member 2                                          | EDN RAF3 RNS2                                                      |
| S100A6  | 6277   | S100 calcium binding protein A6                                         | 2A9 5B10 CABP CACY PRA S10A6                                       |
| SAA1    | 6288   | serum amyloid A1                                                        | PIG4 SAA SAA2 TP53I4                                               |
| SAA2    | 6289   | serum amyloid A2                                                        | SAA SAA1                                                           |
| SBDS    | 51119  | SBDS ribosome maturation                                                | CGI-97 SDS SWDS                                                    |
| SCG2    | 7857   | secretogranin II                                                        | CHGC EM66 SN SgII                                                  |
| SCGB3A1 | 92304  | secretoglobin family 3A member 1                                        | HIN-1 HIN1 LU105 PnSP-2 UGRP2                                      |
| SCT     | 6343   | secretin                                                                | -                                                                  |
| AIMP1   | 9255   | aminoacyl tRNA synthetase complex interacting multifunctional protein 1 | EMAP2 EMAPII HLD3 SCYE1 p43                                        |
| SECTM1  | 6398   | secreted and transmembrane 1                                            | K12 SECTM                                                          |
| SEMA3A  | 10371  | semaphorin 3A                                                           | COLL1 HH16 Hsema-I Hsema-III SEMA1 SEMAD SEMAIII SEMAL SemD coll-1 |
| SEMA3B  | 7869   | semaphorin 3B                                                           | LUCA-1 SEMA5 SEMAA SemA semaV                                      |
| SEMA3C  | 10512  | semaphorin 3C                                                           | SEMAE SemE                                                         |
| SEMA3D  | 223117 | semaphorin 3D                                                           | Sema-Z2 coll-2                                                     |
| SEMA3E  | 9723   | semaphorin 3E                                                           | M-SEMAH M-SemaK SEMAH coll-5                                       |
| SEMA3F  | 6405   | semaphorin 3F                                                           | SEMA-IV SEMA4 SEMAK                                                |
| SEMA3G  | 56920  | semaphorin 3G                                                           | sem2                                                               |
| SEMA4A  | 64218  | semaphorin 4A                                                           | CORD10 RP35 SEMAB SEMB                                             |
| SEMA4B  | 10509  | semaphorin 4B                                                           | SEMAC SemC                                                         |
| SEMA4C  | 54910  | semaphorin 4C                                                           | M-SEMA-F SEMACL1 SEMAF SEMAI                                       |
| SEMA4D  | 10507  | semaphorin 4D                                                           | A8 BB18 C9orf164 CD100 COLL4 GR3 M-sema-G SEMAJ coll-4             |
| SEMA4F  | 10505  | ssemaphorin 4F                                                          | M-SEMA PRO2353 S4F SEMAM SEMAW m-Sema-M                            |
| SEMA4G  | 57715  | semaphorin 4G                                                           | -                                                                  |
| SEMA5A  | 9037   | semaphorin 5A                                                           | SEMAF semF                                                         |
| SEMA5B  | 54437  | semaphorin 5B                                                           | SEMAG SemG                                                         |
| SEMA6A  | 57556  | semaphorin 6A                                                           | HT018 SEMA SEMA6A1 SEMAQ VIA                                       |
| SEMA6B  | 10501  | semaphorin 6B                                                           | EPM11 SEM-SEMA-Y SEMA-VIB SEMAN semaZ                              |
| SEMA6C  | 10500  | semaphorin 6C                                                           | SEMAY m-SemaY m-SemaY2                                             |

|           |        |                                                      |                                                             |
|-----------|--------|------------------------------------------------------|-------------------------------------------------------------|
| SEMA6D    | 80031  | semaphorin 6D                                        | -                                                           |
| SEMA7A    | 8482   | semaphorin 7A (John Milton Hagen blood group)        | CD108 CDw108 H-SEMA-K1 H-Sema-L JMH SEMAK1 SEMAL            |
| SLIT1     | 6585   | slit guidance ligand 1                               | MEGF4 SLIL1 SLIT-1 SLIT3                                    |
| SLIT2     | 9353   | slit guidance ligand 2                               | SLIL3 Slit-2                                                |
| SLURP1    | 57152  | secreted LY6/PLAUR domain containing 1               | ANUP ARS ArsB LY6-MT LY6LS MDM                              |
| SPP1      | 6696   | secreted phosphoprotein 1                            | BNSP BSPI ETA-1 OPN                                         |
| SST       | 6750   | somatostatin                                         | SMST                                                        |
| STC1      | 6781   | stanniocalcin 1                                      | STC                                                         |
| STC2      | 8614   | stanniocalcin 2                                      | STC-2 STCRP                                                 |
| TAC1      | 6863   | tachykinin precursor 1                               | Hs.2563 NK2 NKNA NPK TAC2                                   |
| TDGF1     | 6997   | teratocarcinoma-derived growth factor 1              | CR CR-1 CRGF CRIPTO                                         |
| TDGF1P3   | 6998   | teratocarcinoma-derived growth factor 1 pseudogene 3 | CR-3 CRIPTO CRIPTO-3 CRIPTO3 TDGF1 TDGF2 TDGF3              |
| TG        | 7038   | thyroglobulin                                        | AITD3 TGN                                                   |
| TGFA      | 7039   | transforming growth factor alpha                     | TFGA                                                        |
| TGFB1     | 7040   | transforming growth factor beta 1                    | CED DPD1 IBDIMDE LAP TGF-beta1 TGFB TGFbeta                 |
| TGFB2     | 7042   | transforming growth factor beta 2                    | G-TSF LDS4 TGF-beta2                                        |
| TGFB3     | 7043   | transforming growth factor beta 3                    | ARVD ARVD1 LDS5 RNHF TGF-beta3                              |
| THPO      | 7066   | thrombopoietin                                       | MGDF MKCSF ML MPLLG THCYT1 TPO                              |
| TNC       | 3371   | tenascin C                                           | 150-225 DFNA56 GMEM GP HXB JI TN TN-C                       |
| TNF       | 7124   | tumor necrosis factor                                | DIF TNF-alpha TNFA TNFSF2 TNLG1F                            |
| TNFRSF11B | 4982   | TNF receptor superfamily member 11b                  | OCIF OPG PDB5 TR1                                           |
| TNFSF10   | 8743   | TNF superfamily member 10                            | APO2L Apo-2L CD253 TL2 TNLG6A TRAIL                         |
| TNFSF11   | 8600   | TNF superfamily member 11                            | CD254 ODF OPGL OPTB2 RANKL TNLG6B TRANCE hRANKL2 sOdf       |
| TNFSF12   | 8742   | TNF superfamily member 12                            | APO3L DR3LG TNLG4A TWEAK                                    |
| TNFSF13   | 8741   | TNF superfamily member 13                            | APRIL CD256 TALL-2 TALL2 TNLG7B TRDL-1 UNQ383/PRO715 ZTNF2  |
| TNFSF13B  | 10673  | TNF superfamily member 13b                           | BAFF BLYS CD257 DTL TALL-1 TALL1 THANK TNFSF20 TNLG7A ZTNF4 |
| TNFSF14   | 8740   | TNF superfamily member 14                            | CD258 HVEM LIGHT LTg                                        |
| TNFSF15   | 9966   | TNF superfamily member 15                            | TL1 TL1A TNLG1B VEGI VEGI192A                               |
| TNFSF18   | 8995   | TNF superfamily member 18                            | AITRL GITRL TL6 TNLG2A hGITRL                               |
| TNFSF4    | 7292   | TNF superfamily member 4                             | CD134L CD252 GP34 OX-40L OX40L TNLG2B TXGP1                 |
| TNFSF8    | 944    | TNF superfamily member 8                             | CD153 CD30L CD30LG TNLG3A                                   |
| TNFSF9    | 8744   | TNF superfamily member 9                             | 4-1BB-L CD137L TNLG5A                                       |
| TOR2A     | 27433  | torsin family 2 member A                             | TORP1                                                       |
| TRH       | 7200   | thyrotropin releasing hormone                        | Pro-TRH TRF                                                 |
| TSHB      | 7252   | thyroid stimulating hormone subunit beta             | TSH-B TSH-BETA                                              |
| TSLP      | 85480  | thymic stromal lymphopoietin                         | -                                                           |
| TXLNA     | 200081 | taxilin alpha                                        | IL14 TXLN                                                   |



|           |        |                                             |                                                   |
|-----------|--------|---------------------------------------------|---------------------------------------------------|
| TYMP      | 1890   | thymidine phosphorylase                     | ECGF ECGF1 MEDPS1 MNGIE MTDPS1 PDECGF TP hPD-ECGF |
| UCN       | 7349   | urocortin                                   | UI UROC                                           |
| UCN2      | 90226  | urocortin 2                                 | SRP UCN-II UCNI UR URP                            |
| UCN3      | 114131 | urocortin 3                                 | SCP SPC UCNIII                                    |
| UTS2      | 10911  | urotensin 2                                 | PRO1068 U-II UCN2 UII                             |
| UTS2B     | 257313 | urotensin 2B                                | U2B URP UTS2D                                     |
| VEGFA     | 7422   | vascular endothelial growth factor A        | MVCD1 VEGF VPF                                    |
| VEGFB     | 7423   | vascular endothelial growth factor B        | VEGFL VRF                                         |
| VEGFC     | 7424   | vascular endothelial growth factor C        | Flt4-L LMPH1D LMPHM4 VRP                          |
| VGf       | 7425   | VGf nerve growth factor                     | SCG7 SgVII                                        |
| VIP       | 7432   | vasoactive intestinal peptide               | PHM27                                             |
| XCL1      | 6375   | X-C motif chemokine ligand 1                | ATAC LPTN LTN SCM-1 SCM-1a SCM1 SCM1A SCYC1       |
| XCL2      | 6846   | X-C motif chemokine ligand 2                | SCM-1b SCM1B SCYC2                                |
| ACVR1B    | 91     | activin A receptor type 1B                  | ACTRIB ACVRLK4 ALK4 SKR2                          |
| ACVR1C    | 130399 | activin A receptor type 1C                  | ACVRLK7 ALK7                                      |
| ACVR2A    | 92     | activin A receptor type 2A                  | ACTRII ACVR2                                      |
| ACVR2B    | 93     | activin A receptor type 2B                  | ACTRIIB ActR-IIB HTX4                             |
| ACVRL1    | 94     | activin A receptor like type 1              | ACVRLK1 ALK-1 ALK1 HHT HHT2 ORW2 SKR3 TSR-I       |
| ADCYAP1R1 | 117    | ADCYAP receptor type I                      | PAC1 PAC1R PACAPR PACAPRI                         |
| ADIPOR1   | 51094  | adiponectin receptor 1                      | ACDCR1 CGI-45 CGI45 PAQR1 TESBP1A                 |
| ADIPOR2   | 79602  | adiponectin receptor 2                      | ACDCR2 PAQR2                                      |
| ADRB1     | 153    | adrenoceptor beta 1                         | ADRB1R B1AR BETA1AR FNSS2 RHR                     |
| ADRB2     | 154    | adrenoceptor beta 2                         | ADRB2R ADRB2R B2AR BAR BETA2AR                    |
| AGTR1     | 185    | angiotensin II receptor type 1              | AG2S AGTR1B AT1 AT1AR AT1B AT1BR AT1R AT2R1 HAT1R |
| AGTR2     | 186    | angiotensin II receptor type 2              | AT2 ATGR2 MRX88                                   |
| AMHR2     | 269    | anti-Mullerian hormone receptor type 2      | AMHR MISR2 MISRII MRII                            |
| ANGPT1    | 284    | angiopoietin 1                              | AGP1 AGPT ANG1                                    |
| ANGPT4    | 51378  | angiopoietin 4                              | ANG3 ANG4                                         |
| ANGPTL1   | 9068   | angiopoietin like 1                         | ANG3 ANGPT3 ARP1 AngY UNQ162 dJ595C2.2            |
| ANGPTL2   | 23452  | angiopoietin like 2                         | ARP2 HARP                                         |
| ANGPTL3   | 27329  | angiopoietin like 3                         | ANG-5 ANGPT5 ANL3 FHBL2                           |
| ANGPTL4   | 51129  | angiopoietin like 4                         | ARP4 FIAF HARP HFARP NL2 PGAR TGQTL UNQ171 pp1158 |
| ANGPTL6   | 83854  | angiopoietin like 6                         | AGF ARP5                                          |
| APLNR     | 187    | apelin receptor                             | AGTRL1 APJ APJR HG11                              |
| AR        | 367    | androgen receptor                           | AIS AR8 DHTR HUMARA HYSP1 KD NR3C4 SBMA SMAX1 TFM |
| AVPR1A    | 552    | arginine vasopressin receptor 1A            | AVPR V1a AVPR1 V1aR                               |
| AVPR1B    | 553    | arginine vasopressin receptor 1B            | AVPR3 V1bR                                        |
| AVPR2     | 554    | arginine vasopressin receptor 2             | ADHR DI1 DIR DIR3 NDI V2R                         |
| BMPR1A    | 657    | bone morphogenetic protein receptor type 1A | 10q23del ACVRLK3 ALK3 CD292 SKR5                  |

|        |       |                                             |                                                                                       |
|--------|-------|---------------------------------------------|---------------------------------------------------------------------------------------|
| BMPR1B | 658   | bone morphogenetic protein receptor type 1B | ALK-6 ALK6 AMDD BDA1D BDA2 CDw293                                                     |
| BMPR2  | 659   | bone morphogenetic protein receptor type 2  | BMPR-II BMPR3 BMR2 BRK-3 POVD1 PPH1 T-ALK                                             |
| BRD8   | 10902 | bromodomain containing 8                    | SMAP SMAP2 p120                                                                       |
| C3AR1  | 719   | complement C3a receptor 1                   | AZ3B C3AR HNFA09                                                                      |
| C5AR1  | 728   | complement C5a receptor 1                   | C5A C5AR C5R1 CD88                                                                    |
| CALCR  | 799   | calcitonin receptor                         | CRT CT-R CTR CTR1                                                                     |
| CALCRL | 10203 | calcitonin receptor like receptor           | CGRPR CRLR LMPHM8                                                                     |
| ACKR2  | 1238  | atypical chemokine receptor 2               | CCBP2 CCR10 CCR9 CMKBR9 D6 hD6                                                        |
| CCR1   | 1230  | C-C motif chemokine receptor 1              | CD191 CKR-1 CKR1 CMKBR1 HM145 MIP1aR SCYAR1                                           |
| CCR10  | 2826  | C-C motif chemokine receptor 10             | GPR2                                                                                  |
| CCR3   | 1232  | C-C motif chemokine receptor 3              | C C CKR3 CC-CKR-3 CD193 CKR3 CKR3 CMKBR3                                              |
| CCR4   | 1233  | C-C motif chemokine receptor 4              | CC-CKR-4 CD194 CKR4 CMKBR4 ChemR13 HGCN:14099 K5-5                                    |
| CCR5   | 1234  | C-C motif chemokine receptor 5              | CC-CKR-5 CCCKR5 CCR-5 CD195 CKR-5 CKR5 CMKBR5 IDDM22                                  |
| CCR6   | 1235  | C-C motif chemokine receptor 6              | BN-1 C-C CKR-6 CC-CKR-6 CCR-6 CD196 CKR-L3 CKRL3 CMKBR6 DCR2 DRY6 GPR29 GPRCY4 STRL22 |
| CCR7   | 1236  | C-C motif chemokine receptor 7              | BLR2 CC-CKR-7 CCR-7 CD197 CDw197 CMKBR7 EBI1                                          |
| CCR8   | 1237  | C-C motif chemokine receptor 8              | CC-CKR-8 CCR-8 CDw198 CKRL1 CMKBR8 CMKBRL2 CY6 GPRCY6 TER1                            |
| CCR9   | 10803 | C-C motif chemokine receptor 9              | CC-CKR-9 CDw199 GPR-9-6 GPR28                                                         |
| ACKR4  | 51554 | atypical chemokine receptor 4               | CC-CKR-11 CCBP2 CCR-11 CCR10 CCR11 CCRL1 CCXCKR CCX-CKR CKR-11 PPR1 VSHK1             |
| CCRL2  | 9034  | C-C motif chemokine receptor like 2         | ACKR5 CKRX CRAM CRAM-A CRAM-B HCR                                                     |
| CD40   | 958   | CD40 molecule                               | Bp50 CDW40 TNFRSF5 p50                                                                |
| CMKLR1 | 1240  | chemerin chemokine-like receptor 1          | CHEMERINR ChemR23 DEZ RVER1                                                           |
| CNTFR  | 1271  | ciliary neurotrophic factor receptor        | -                                                                                     |
| CRHR1  | 1394  | corticotropin releasing hormone receptor 1  | CRF-R CRF-R-1 CRF-R1 CRF1 CRFR-1 CRFR1 CRH-R-1 CRH-R1 CRHR CRHR1L                     |
| CRHR2  | 1395  | corticotropin releasing hormone receptor 2  | CRF-RB CRF2 CRFR2 HM-CRF                                                              |
| CRIM1  | 51232 | cysteine rich transmembrane BMP regulator 1 | CRIM-1 S52                                                                            |
| CRLF1  | 9244  | cytokine receptor like factor 1             | CISS CISS1 CLF CLF-1 NR6 zcytor5                                                      |
| CRLF2  | 64109 | cytokine receptor like factor 2             | CRL2 CRLF2Y TSLPR                                                                     |
| CRLF3  | 51379 | cytokine receptor like factor 3             | CREME-9 CREME9 CRLM9 CYTOR4 FRWS p48.2                                                |

|         |       |                                                    |                                                                                                                  |
|---------|-------|----------------------------------------------------|------------------------------------------------------------------------------------------------------------------|
| CSF1R   | 1436  | colony stimulating factor 1 receptor               | BANDDOS C-FMS CD115 CSF-1R CSFR FIM2 FMS HDLS M-CSF-R                                                            |
| CSF2RA  | 1438  | colony stimulating factor 2 receptor subunit alpha | CD116 CDw116 CSF2R CSF2RAX CSF2RAY CSF2RX CSF2RY GM-CSF-R-alpha GMCSFR GMCSFR-alpha GMR GMR-alpha SMDP4 alphaGMR |
| CSF2RB  | 1439  | colony stimulating factor 2 receptor subunit beta  | CD131 CDw131 IL3RB IL5RB SMDP5 betaGMR                                                                           |
| CSF3R   | 1441  | colony stimulating factor 3 receptor               | CD114 GCSFR SCN7                                                                                                 |
| CX3CR1  | 1524  | C-X3-C motif chemokine receptor 1                  | CCRL1 CMKBRL1 CMKDR1 GPR13 GPRV28 V28                                                                            |
| CXCR3   | 2833  | C-X-C motif chemokine receptor 3                   | CD182 CD183 CKR-L2 CMKAR3 GPR9 IP10-R Mig-R MigR                                                                 |
| CXCR4   | 7852  | C-X-C motif chemokine receptor 4                   | CD184 D2S201E FB22 HM89 HSY3RR LAP-3 LAP3 LCR1 LESTR NPY3R NPYR NPYRL NPYY3R WHIM WHIMS                          |
| CXCR5   | 643   | C-X-C motif chemokine receptor 5                   | BLR1 CD185 MDR15                                                                                                 |
| CXCR6   | 10663 | C-X-C motif chemokine receptor 6                   | BONZO CD186 STRL33 TYMSTR                                                                                        |
| ACKR3   | 57007 | atypical chemokine receptor 3                      | CMKOR1 CXC-R7 CXCR-7 CXCR7 GPR159 RDC-1 RDC1                                                                     |
| CYSLTR1 | 10800 | cysteinyl leukotriene receptor 1                   | CYSLT1 CYSLT1R CYSLTR HMTMF81                                                                                    |
| CYSLTR2 | 57105 | cysteinyl leukotriene receptor 2                   | CYSLT2 CYSLT2R GPCR21 HG57 HPN321 KPG_011 PSEC0146 hGPCR21                                                       |
| ACKR1   | 2532  | atypical chemokine receptor 1 (Duffy blood group)  | CCBP1 CD234 DARC DARC/ACKR1 Dfy FY GPD GpFy WBCQ1                                                                |
| EDNRA   | 1909  | endothelin receptor type A                         | ET-A ETA ETA-R ETAR ETRA MFDA hET-AR                                                                             |
| EDNRB   | 1910  | endothelin receptor type B                         | ABCDS ET-B ET-BR ETB ETB1 ETBR ETRB HSCR HSCR2 WS4A                                                              |
| EGFR    | 1956  | epidermal growth factor receptor                   | ERBB ERBB1 HER1 NISBD2 PIG61 mEN A                                                                               |
| ENG     | 2022  | endoglin                                           | END HHT1 ORW1                                                                                                    |
| EPOR    | 2057  | erythropoietin receptor                            | EPO-R                                                                                                            |
| ESR1    | 2099  | estrogen receptor 1                                | ER ESR ESRA ESTRR Era NR3A1                                                                                      |
| ESR2    | 2100  | estrogen receptor 2                                | ER-BETA ESR-BETA ESRB ESTRB Erb NR3A2 ODG8                                                                       |
| ESRRA   | 2101  | estrogen related receptor alpha                    | ERR1 ERRa ERRalpha ESRL1 NR3B1                                                                                   |
| ESRRB   | 2103  | estrogen related receptor beta                     | DFNB35 ERR beta-2 ERR2 ERRb ERRbeta2 ESRL2 NR3B2                                                                 |
| ESRRG   | 2104  | estrogen related receptor gamma                    | ERR-gamma ERR3 ERRg ERRgamma NR3B3                                                                               |
| FGFR1   | 2260  | fibroblast growth factor receptor 1                | BFGFR CD331 CEK ECCL FGFBR FGFR-1 FLG FLT-2 FLT2 HBGFR HH2 HRTFDS KAL2 N-SAM OGD bFGF-R-1                        |
| FGFR2   | 2263  | fibroblast growth factor receptor 2                | BBDS BEK BFR-1 CD332 CEK3 CFD1 ECT1 JWS K-SAM KGFR TK14 TK25                                                     |

|        |        |                                           |                                                                             |
|--------|--------|-------------------------------------------|-----------------------------------------------------------------------------|
| FGFR3  | 2261   | fibroblast growth factor receptor         | ACH CD333 CEK2 HSFGFR3EX JTK4                                               |
| FGFR4  | 2264   | fibroblast growth factor receptor         | CD334 JTK2 TKF                                                              |
| FGFRL1 | 53834  | fibroblast growth factor receptor like 1  | FGFR-5 FGFR5 FHFR                                                           |
| FLT1   | 2321   | fms related receptor tyrosine kinase 1    | FLT FLT-1 VEGFR-1 VEGFR1                                                    |
| FLT3   | 2322   | fms related receptor tyrosine kinase 3    | CD135 FLK-2 FLK2 STK1                                                       |
| FLT4   | 2324   | fms related receptor tyrosine kinase 4    | CHTD7 FLT-4 FLT41 LMPH1A LMPHM1 PCL VEGFR-3 VEGFR3                          |
| FPR1   | 2357   | formyl peptide receptor 1                 | FMLP FPR                                                                    |
| FPR2   | 2358   | formyl peptide receptor 2                 | ALXR FMLP-R-II FMLPX FPR2A FPRH1 FPRH2 FPRL1 HM63 LXA4R                     |
| FPR2   | 2358   | formyl peptide receptor 2                 | ALXR FMLP-R-II FMLPX FPR2A FPRH1 FPRH2 FPRL1 HM63 LXA4R                     |
| FSHR   | 2492   | follicle stimulating hormone receptor     | FSHR1 FSHRO LGR1 ODG1                                                       |
| GALR2  | 8811   | galanin receptor 2                        | GAL2-R GALNR2 GALR-2                                                        |
| GALR3  | 8484   | galanin receptor 3                        | -                                                                           |
| GCGR   | 2642   | glucagon receptor                         | GGR GL-R                                                                    |
| GHR    | 2690   | growth hormone receptor                   | GHBP GHIP                                                                   |
| GHRHR  | 2692   | growth hormone releasing hormone receptor | GHRFR GRFR IGHD1B IGHD4                                                     |
| GHSR   | 2693   | growth hormone secretagogue receptor      | GHDP                                                                        |
| GIPR   | 2696   | gastric inhibitory polypeptide receptor   | PGQTL2                                                                      |
| GLP1R  | 2740   | glucagon like peptide 1 receptor          | GLP-1 GLP-1-R GLP-1R                                                        |
| GLP2R  | 9340   | glucagon like peptide 2 receptor          | -                                                                           |
| GNRHR  | 2798   | gonadotropin releasing hormone receptor   | GNRHR1 GRHR HH7 LHRHR LRHR                                                  |
| GPER1  | 2852   | G protein-coupled estrogen receptor 1     | CEPR CMKRL2 DRY12 FEG-1 GPCR-Br GPER GPR30 LERGU LERGU2 LyGPR mER           |
| GPR17  | 2840   | G protein-coupled receptor 17             | -                                                                           |
| GPR32  | 2854   | G protein-coupled receptor 32             | RVDR1                                                                       |
| GPR33  | 2856   | G protein-coupled receptor 33             | -                                                                           |
| PTGDR2 | 11251  | prostaglandin D2 receptor 2               | CD294 CRTH2 DL1R DP2 GPR44                                                  |
| C5AR2  | 27202  | complement component 5a receptor 2        | C5L2 GPF77 GPR77                                                            |
| HNF4A  | 3172   | hepatocyte nuclear factor 4 alpha         | FRTS4 HNF4 HNF4a7 HNF4a8 HNF4a9 HNF4alpha MODY MODY1 NR2A1 NR2A21 TCF TCF14 |
| HNF4G  | 3174   | hepatocyte nuclear factor 4 gamma         | NR2A2 NR2A3                                                                 |
| HTR3A  | 3359   | 5-hydroxytryptamine receptor 3A           | 5-HT-3 5-HT3A 5-HT3R 5HT3R HTR3                                             |
| HTR3B  | 9177   | 5-hydroxytryptamine receptor 3B           | 5-HT3B                                                                      |
| HTR3C  | 170572 | 5-hydroxytryptamine receptor 3C           | -                                                                           |
| HTR3D  | 200909 | 5-hydroxytryptamine receptor 3D           | 5HT3D                                                                       |
| HTR3E  | 285242 | 5-hydroxytryptamine receptor 3E           | 5-HT3-E 5-HT3E 5-HT3c1                                                      |

|         |        |                                              |                                                                                      |
|---------|--------|----------------------------------------------|--------------------------------------------------------------------------------------|
| IFNAR1  | 3454   | interferon alpha and beta receptor subunit 1 | AVP IFN-alpha-REC IFNAR IFNBR IFRC                                                   |
| IFNAR2  | 3455   | interferon alpha and beta receptor subunit 2 | IFN-R IFN-alpha-REC IFNABR IFNARB IMD45                                              |
| IFNGR1  | 3459   | interferon gamma receptor 1                  | CD119 IFNGR IMD27A IMD27B                                                            |
| IFNGR2  | 3460   | interferon gamma receptor 2                  | AF-1 IFGR2 IFNGT1 IMD28                                                              |
| IGF1R   | 3480   | insulin like growth factor 1 receptor        | CD221 IGFIR IGFR JTK13                                                               |
| IGF2R   | 3482   | insulin like growth factor 2 receptor        | CD222 CI-M6PR CIMPR M6P-R M6P/IGF2R MPR300 MPR1 MPR300 MPRI                          |
| IL10RA  | 3587   | interleukin 10 receptor subunit alpha        | CD210 CD210a CDW210A HIL-10R IL-10R1 IL10R                                           |
| IL10RB  | 3588   | interleukin 10 receptor subunit beta         | CDW210B CRF2-4 CRFB4 D21S58 D21S66 IL-10R2                                           |
| IL11RA  | 3590   | interleukin 11 receptor subunit alpha        | CRSDA                                                                                |
| IL12RB1 | 3594   | interleukin 12 receptor subunit beta 1       | CD212 IL-12R-BETA1 IL12RB IMD30                                                      |
| IL12RB2 | 3595   | interleukin 12 receptor subunit beta 2       | -                                                                                    |
| IL13RA1 | 3597   | interleukin 13 receptor subunit alpha 1      | CD213A1 CT19 IL-13Ra NR4                                                             |
| IL13RA2 | 3598   | interleukin 13 receptor subunit alpha 2      | CD213A2 CT19 IL-13R IL13BP                                                           |
| IL15RA  | 3601   | interleukin 15 receptor subunit alpha        | CD215                                                                                |
| IL2RB   | 3560   | interleukin 2 receptor subunit               | CD122 IL15RB IMD63 P70-75                                                            |
| IL17RA  | 23765  | interleukin 17 receptor A                    | CANDF5 CD217 CDw217 IL-17RA IL17R IMD51 hIL-17R                                      |
| IL17RB  | 55540  | interleukin 17 receptor B                    | CRL4 EVI27 IL17BR IL17RH1                                                            |
| IL17RC  | 84818  | interleukin 17 receptor C                    | CANDF9 IL17-RL IL17RL                                                                |
| IL17RD  | 54756  | interleukin 17 receptor D                    | HH18 IL-17RD IL17RLM SEF                                                             |
| IL17RE  | 132014 | interleukin 17 receptor E                    | -                                                                                    |
| IL18R1  | 8809   | interleukin 18 receptor 1                    | CD218a CDw218a IL-18R-alpha IL-18Ralpha IL-1Rrp IL18RA IL18Ralpha2 IL1RRP            |
| IL18RAP | 8807   | interleukin 18 receptor accessory protein    | ACPL CD218b CDw218b IL-18R-beta IL-18RAcP IL-18Rbeta IL-1R-7 IL-1R7 IL-1RAcPL IL18RB |
| IL1R1   | 3554   | interleukin 1 receptor type 1                | CD121A D2S1473 IL-1R-alpha IL1R IL1RA P80                                            |
| IL1R2   | 7850   | interleukin 1 receptor type 2                | CD121b CDw121b IL-1R-2 IL-1RT-2 IL-1RT2 IL1R2c IL1RB                                 |
| IL1RAP  | 3556   | interleukin 1 receptor accessory protein     | C3orf13 IL-1RAcP IL1R3                                                               |
| IL1RL1  | 9173   | interleukin 1 receptor like 1                | DER4 FIT-1 IL33R ST2 ST2L ST2V T1                                                    |
| IL1RL2  | 8808   | interleukin 1 receptor like 2                | IL-1Rrp2 IL-36R IL1R-rp2 IL1RRP2                                                     |
| IL20RA  | 53832  | interleukin 20 receptor subunit alpha        | CRF2-8 IL-20R-alpha IL-20R1 IL-20RA                                                  |
| IL20RB  | 53833  | interleukin 20 receptor subunit beta         | DIRS1 FNDC6 IL-20R2                                                                  |
| IL21R   | 50615  | interleukin 21 receptor                      | CD360 IMD56 NILR                                                                     |

|         |        |                                                             |                                                                   |
|---------|--------|-------------------------------------------------------------|-------------------------------------------------------------------|
| IL22RA1 | 58985  | interleukin 22 receptor subunit alpha 1                     | CRF2-9 IL22R IL22R1                                               |
| IL22RA2 | 116379 | interleukin 22 receptor subunit alpha 2                     | CRF2-10 CRF2-S1 CRF2X IL-22BP IL-22R-alpha-2 IL-22RA2 ZCYTOR16    |
| IL23R   | 149233 | interleukin 23 receptor                                     | -                                                                 |
| IL27RA  | 9466   | interleukin 27 receptor subunit alpha                       | CRL1 IL-27RA IL27R TCCR WSX1 zcytor1                              |
| IFNLR1  | 163702 | interferon lambda receptor 1                                | CRF2/12 IFNLR IL-28R1 IL28RA LICR2                                |
| IL2RA   | 3559   | interleukin 2 receptor subunit alpha                        | CD25 IDDM10 IL2R IMD41 TCGFR p55                                  |
| IL2RB   | 3560   | interleukin 2 receptor subunit                              | CD122 IL15RB IMD63 P70-75                                         |
| IL2RG   | 3561   | interleukin 2 receptor subunit gamma                        | CD132 CIDX IL-2RG IMD4 P64 SCIDX SCIDX1                           |
| IL31RA  | 133396 | interleukin 31 receptor A                                   | CRL CRL3 GLM-R GLMR GPL IL-31RA PLCA2 PRO21384 hGLM-R             |
| IL3RA   | 3563   | interleukin 3 receptor subunit alpha                        | CD123 IL3R IL3RAY IL3RX IL3RY hIL-3Ra                             |
| IL4R    | 3566   | interleukin 4 receptor                                      | CD124 IL-4RA IL4RA                                                |
| IL5RA   | 3568   | interleukin 5 receptor subunit alpha                        | CD125 CDw125 HSIL5R3 IL5R                                         |
| IL6R    | 3570   | interleukin 6 receptor                                      | CD126 IL-6R-1 IL-6RA IL6Q IL6RA IL6RQ gp80                        |
| IL7R    | 3575   | interleukin 7 receptor                                      | CD127 CDW127 IL-7R-alpha IL7RA ILRA                               |
| CXCR1   | 3577   | C-X-C motif chemokine receptor 1                            | C-C C-C-CKR-1 CD128 CD181 CDw128a CKR-1 CMKAR1 IL8R1 IL8RA IL8RBA |
| CXCR2   | 3579   | C-X-C motif chemokine receptor 2                            | CD182 CDw128b CMKAR2 IL8R2 IL8RA  L8RB                            |
| IL9R    | 3581   | interleukin 9 receptor                                      | CD129 IL-9R                                                       |
| INSR    | 3643   | insulin receptor                                            | CD220 HHF5                                                        |
| KDR     | 3791   | kinase insert domain receptor                               | CD309 FLK1 VEGFR VEGFR2                                           |
| LEPR    | 3953   | leptin receptor                                             | CD295 LEP-R LEPRD OB-R OBR                                        |
| LGR4    | 55366  | leucine rich repeat containing G protein-coupled receptor 4 | BNMD17 GPR48                                                      |
| LGR5    | 8549   | leucine rich repeat containing G protein-coupled receptor 5 | FEX GPR49 GPR67 GRP49 HG38                                        |
| LGR6    | 59352  | leucine rich repeat containing G protein-coupled receptor 6 | GPCR VTS20631                                                     |
| LHCGR   | 3973   | luteinizing hormone/choriogonadotropin receptor             | HHG LCGR LGR2 LH/CG-R LH/CGR LHR LHRHR LSH-R ULG5                 |
| LIFR    | 3977   | LIF receptor subunit alpha                                  | CD118 LIF-R SJS2 STWS SWS                                         |
| LTB4R   | 1241   | leukotriene B4 receptor                                     | BLT1 BLTR CMKRL1 GPR16 LTB4R1 LTBR1 P2RY7 P2Y7                    |
| LTB4R2  | 56413  | leukotriene B4 receptor 2                                   | BLT2 BLTR2 JULF2 KPG_004 LTB4-R2 LTB4-R2 NOP9                     |
| LTBR    | 4055   | lymphotoxin beta receptor                                   | D12S370 LT-BETA-R TNF-R-III TNFCR TNFR-RP TNFR2-RP TNFR3 TNFRSF3  |
| MC1R    | 4157   | melanocortin 1 receptor                                     | CMM5 MSH-R SHEP2                                                  |
| MC2R    | 4158   | melanocortin 2 receptor                                     | ACTHR                                                             |
| MC3R    | 4159   | melanocortin 3 receptor                                     | BMIQ9 MC3 MC3-R OB20 OQTL                                         |
| MC4R    | 4160   | melanocortin 4 receptor                                     | BMIQ20                                                            |

|        |       |                                               |                                                                         |
|--------|-------|-----------------------------------------------|-------------------------------------------------------------------------|
| MCHR1  | 2847  | melanin concentrating hormone receptor 1      | GPR24 MCH-1R MCH1R SLC-1 SLC1                                           |
| MCHR2  | 84539 | melanin concentrating hormone receptor 2      | GPR145 GPRv17 MCH-2R MCH-R2 MCH2 MCH2R MCHR-2 SLT                       |
| MET    | 4233  | MET proto-oncogene, receptor tyrosine kinase  | AUTS9 DFNB97 HGFR RCCP2 c-Met                                           |
| MLNR   | 2862  | motilin receptor                              | GPR38 MLR1                                                              |
| MPL    | 4352  | MPL proto-oncogene, thrombopoietin receptor   | C-MPL CD110 MPLV THCYT2 THPOR TPOR                                      |
| MTNR1A | 4543  | melatonin receptor 1A                         | MEL-1A-R MT1                                                            |
| MTNR1B | 4544  | melatonin receptor 1B                         | FGQTL2 MEL-1B-R MT2                                                     |
| NGFR   | 4804  | nerve growth factor receptor                  | CD271 Gp80-LNGFR TNFRSF16 p75(NTR) p75NTR                               |
| NMBR   | 4829  | neuromedin B receptor                         | BB1 BB1R NMB-R                                                          |
| NPR1   | 4881  | natriuretic peptide receptor 1                | ANPRA ANPa GUC2A GUCY2A NPRA                                            |
| NPR3   | 4883  | natriuretic peptide receptor 3                | ANP-C ANPR-C ANPRC C5orf23 GUCY2B NPR-C NPRC                            |
| NR0B1  | 190   | nuclear receptor subfamily 0 group B member 1 | AHC AHCH AHX DAX-1 DAX1 DSS GTD HHG NROB1 SRXY2                         |
| NR0B2  | 8431  | nuclear receptor subfamily 0 group B member 2 | SHP SHP1                                                                |
| NR1D1  | 9572  | nuclear receptor subfamily 1 group D member 1 | EAR1 REVERBA REVERBalpha THRA1 THRAL ear-1 hRev                         |
| NR1D2  | 9975  | nuclear receptor subfamily 1 group D member 2 | BD73 EAR-1R REVERBB REVERBbeta RVR                                      |
| NR1H2  | 7376  | nuclear receptor subfamily 1 group H member 2 | LXR-b LXRB NER NER-I RIP15 UNR                                          |
| NR1H3  | 10062 | nuclear receptor subfamily 1 group H member 3 | LXR-a LXRA RLD-1                                                        |
| NR1H4  | 9971  | nuclear receptor subfamily 1 group H member 4 | BAR FXR HRR-1 HRR1 PFIC5 RIP14                                          |
| NR1I2  | 8856  | nuclear receptor subfamily 1 group I member 2 | BXR ONR1 PAR PAR1 PAR2 PARq PRR PXR SAR SXR                             |
| NR1I3  | 9970  | nuclear receptor subfamily 1 group I member 3 | CAR CAR1 MB67                                                           |
| NR2C1  | 7181  | nuclear receptor subfamily 2 group C member 1 | TR2                                                                     |
| NR2C2  | 7182  | nuclear receptor subfamily 2 group C member 2 | TAK1 TR4                                                                |
| NR2E1  | 7101  | nuclear receptor subfamily 2 group E member 1 | TLL TLX XTLL                                                            |
| NR2E3  | 10002 | nuclear receptor subfamily 2 group E member 3 | ESCS PNR RNR RP37 rd7                                                   |
| NR2F1  | 7025  | nuclear receptor subfamily 2 group F member 1 | BBOAS BBSOAS COUP-TFI COUPTF1 EAR-3 EAR3 ERBAL3 SVP44 TCFCOUP1 TF COUP1 |
| NR2F2  | 7026  | nuclear receptor subfamily 2 group F member 2 | ARP-1 ARP1 CHTD4 COUPTF2 COUPTFB COUPTFII NF-E3 SVP40 TFCOUP2           |
| NR2F6  | 2063  | nuclear receptor subfamily 2 group F member 6 | EAR-2 EAR2 ERBAL2                                                       |

|        |       |                                                  |                                                            |
|--------|-------|--------------------------------------------------|------------------------------------------------------------|
| NR3C1  | 2908  | nuclear receptor subfamily 3 group C member 1    | GCCR GCR GCRST GR GRL                                      |
| NR3C2  | 4306  | nuclear receptor subfamily 3 group C member 2    | MCR MLR MR NR3C2VIT                                        |
| NR4A1  | 3164  | nuclear receptor subfamily 4 group A member 1    | GFRP1 HMR N10 NAK-1 NGFIB NP10 NUR77 TR3                   |
| NR4A2  | 4929  | nuclear receptor subfamily 4 group A member 2    | HZF-3 NOT NURR1 RNR1 TINUR                                 |
| NR4A3  | 8013  | nuclear receptor subfamily 4 group A member 3    | CHN CSMF MINOR NOR1 TEC                                    |
| NR5A1  | 2516  | nuclear receptor subfamily 5 group A member 1    | AD4BP ELP FTZ1 FTZF1 POF7 SF-1 SF1 SPGF8 SRXX4 SRXY3 hSF-1 |
| NR5A2  | 2494  | nuclear receptor subfamily 5 group A member 2    | B1F B1F2 CPF FTF FTZ-F1 FTZ-F1beta LRH-1 LRH1 hB1F-2       |
| NR6A1  | 2649  | nuclear receptor subfamily 6 group A member 1    | CT150 GCNF GCNF1 NR61 RTR hGCNF hRTR                       |
| NRP1   | 8829  | neuropilin 1                                     | BDCA4 CD304 NP1 NRP VEGF165R                               |
| NRP2   | 8828  | neuropilin 2                                     | NP2 NPN2 PRO2714 VEGF165R2                                 |
| OGFR   | 11054 | opioid growth factor receptor                    | -                                                          |
| OPRD1  | 4985  | opioid receptor delta 1                          | DOP DOR DOR1 OPRD                                          |
| OPRK1  | 4986  | opioid receptor kappa 1                          | K-OR-1 KOP KOR KOR-1 KOR1 OPRK                             |
| OPRL1  | 4987  | opioid related nociceptin receptor 1             | KOR-3 KOR3 NOCIR NOP NOPr OOR OPRL ORL1                    |
| OPRM1  | 4988  | opioid receptor mu 1                             | LMOR M-OR-1 MOP MOR MOR1 OPRM                              |
| OSMR   | 9180  | oncostatin M receptor                            | IL-31R-beta IL-31RB OSMRB OSMRbeta PLCA1                   |
| OXTR   | 5021  | oxytocin receptor                                | OT-R                                                       |
| PGR    | 5241  | progesterone receptor                            | NR3C3 PR                                                   |
| PGRMC2 | 10424 | progesterone receptor membrane component 2       | DG6 PMBP                                                   |
| PLAUR  | 5329  | plasminogen activator, urokinase receptor        | CD87 U-PAR UPAR URKR                                       |
| PLXNA1 | 5361  | plexin A1                                        | NOV NOVP PLEXIN-A1 PLXN1                                   |
| PLXNA2 | 5362  | plexin A2                                        | OCT PLXN2                                                  |
| PLXNA3 | 55558 | plexin A3                                        | 6.3 HSSEXGENE PLXN3 PLXN4 XAP-6                            |
| PLXNA4 | 91584 | plexin A4                                        | FAYV2820 PLEXA4 PLXNA4A PLXNA4B PRO34003                   |
| PLXNB1 | 5364  | plexin B1                                        | PLEXIN-B1 PLXN5 SEP                                        |
| PLXNB2 | 23654 | plexin B2                                        | MM1 Nbla00445 PLEXB2 dJ402G11.3                            |
| PLXNB3 | 5365  | plexin B3                                        | PLEXB3 PLEXR PLXN6                                         |
| PLXNC1 | 10154 | plexin C1                                        | CD232 PLXN-C1 VESPR                                        |
| PLXND1 | 23129 | plexin D1                                        | PLEXD1                                                     |
| PPARA  | 5465  | peroxisome proliferator activated receptor alpha | NR1C1 PPAR PPARalpha hPPAR                                 |
| PPARD  | 5467  | peroxisome proliferator activated receptor delta | FAAR NR1C2 NUC1 NUCI NUCII PPARB                           |
| PPARG  | 5468  | peroxisome proliferator activated receptor gamma | CIMT1 GLM1 NR1C3 PPARG1 PPARG2 PPARG5 PPARgamma            |
| PRLHR  | 2834  | prolactin releasing hormone receptor             | GPR10 GR3 PrRPR                                            |
| PRLR   | 5618  | prolactin receptor                               | HPRL MFAB RI-PRLR hPRLrI                                   |
| PTAFR  | 5724  | platelet activating factor receptor              | PAFR                                                       |
| PTGDR  | 5729  | prostaglandin D2 receptor                        | AS1 ASRT1 DP DP1 PTGDR1                                    |



|        |        |                                            |                                                                                     |
|--------|--------|--------------------------------------------|-------------------------------------------------------------------------------------|
| PTGDS  | 5730   | prostaglandin D2 synthase                  | L-PGDS LPGDS PDS PGD2 PGDS PGDS2                                                    |
| PTGER1 | 5731   | prostaglandin E receptor 1                 | EP1                                                                                 |
| PTGER2 | 5732   | prostaglandin E receptor 2                 | EP2                                                                                 |
| PTGER3 | 5733   | prostaglandin E receptor 3                 | EP3 EP3-I EP3-II EP3-III EP3-IV EP3-VI EP3e PGE2-R Inc003875                        |
| PTGER4 | 5734   | prostaglandin E receptor 4                 | EP4 EP4R                                                                            |
| PTGFR  | 5737   | prostaglandin F receptor                   | FP                                                                                  |
| PTH1R  | 5745   | parathyroid hormone 1 receptor             | EKNS PFE PTHR PTHR1                                                                 |
| PTH2R  | 5746   | parathyroid hormone 2 receptor             | PTHR2                                                                               |
| RARA   | 5914   | retinoic acid receptor alpha               | NR1B1 RAR                                                                           |
| RARB   | 5915   | retinoic acid receptor beta                | HAP MCOPS12 NR1B2 RARbeta1 RRB2                                                     |
| RARG   | 5916   | retinoic acid receptor gamma               | NR1B3 RARC                                                                          |
| ROBO1  | 6091   | roundabout guidance receptor 1             | DUTT1 SAX3                                                                          |
| ROBO2  | 6092   | roundabout guidance receptor 2             | SAX3                                                                                |
| ROBO3  | 64221  | roundabout guidance receptor 3             | HGPPS HGPPS1 HGPS RBIG1 RIG1                                                        |
| RORA   | 6095   | RAR related orphan receptor A              | IDDECA NR1F1 ROR1 ROR2 ROR3 RZR-ALPHA RZRA                                          |
| RORB   | 6096   | RAR related orphan receptor B              | EIG15 NR1F2 ROR-BETA RZR-BETA RZRB bA133M9.1                                        |
| RORC   | 6097   | RAR related orphan receptor C              | IMD42 NR1F3 RORG RZR-GAMMA RZRG TOR                                                 |
| RXFP1  | 59350  | relaxin family peptide receptor 1          | LGR7 RXFPR1                                                                         |
| RXFP2  | 122042 | relaxin family peptide receptor 2          | GPR106 GREAT INSL3R LGR8 LGR8.1 RXFPR2                                              |
| RXFP3  | 51289  | relaxin family peptide receptor 3          | GPCR135 RLN3R1 RXFPR3 SALPR                                                         |
| RXRA   | 6256   | retinoid X receptor alpha                  | NR2B1                                                                               |
| RXRB   | 6257   | retinoid X receptor beta                   | DAUDI6 H-2RIIBP NR2B2 RCoR-1                                                        |
| RXRG   | 6258   | retinoid X receptor gamma                  | NR2B3 RXRC                                                                          |
| S1PR1  | 1901   | sphingosine-1-phosphate receptor 1         | CD363 CHEDG1 D1S3362 ECGF1 EDG-1 EDG1 S1P1                                          |
| S1PR2  | 9294   | sphingosine-1-phosphate receptor 2         | AGR16 DFNB68 EDG-5 EDG5 Gpcr13 H218 LPB2 S1P2                                       |
| SCTR   | 6344   | secretin receptor                          | SR                                                                                  |
| SDC1   | 6382   | syndecan 1                                 | CD138 SDC SYND1 syndecan                                                            |
| SDC2   | 6383   | syndecan 2                                 | CD362 HSPG HSPG1 SYND2                                                              |
| SDC3   | 9672   | syndecan 3                                 | SDCN SYND3                                                                          |
| SDC4   | 6385   | syndecan 4                                 | SYND4                                                                               |
| SORT1  | 6272   | sortilin 1                                 | Gp95 LDLCQ6 NT3 NTR3                                                                |
| SSTR1  | 6751   | somatostatin receptor 1                    | SRIF-2 SS-1-R SS1-R SS1R                                                            |
| SSTR2  | 6752   | somatostatin receptor 2                    | -                                                                                   |
| SSTR5  | 6755   | somatostatin receptor 5                    | SS-5-R                                                                              |
| ST2    | 6761   | -                                          | -                                                                                   |
| TACR1  | 6869   | tachykinin receptor 1                      | NK1R NKIR SPR TAC1R                                                                 |
| TEK    | 7010   | TEK receptor tyrosine kinase               | CD202B GLC3E TIE-2 TIE2 VMCM VMCM1                                                  |
| TGFBR1 | 7046   | transforming growth factor beta receptor 1 | AAT5 ACVRLK4 ALK-5 ALK5 ESS1 LDS1 LDS1A LDS2A MSS E SKR4 TBR-i TBRI TGFR-1 tbetaR-I |
| TGFBR2 | 7048   | transforming growth factor beta receptor 2 | AAT3 FAA3 LDS1B LDS2 LDS2B MFS2 RIIC TAAD2 TBR-ii TBRII TGFR-2 TGFbeta-RII          |

|           |        |                                                                 |                                                                                  |
|-----------|--------|-----------------------------------------------------------------|----------------------------------------------------------------------------------|
| TGFBR3    | 7049   | transforming growth factor beta receptor 3                      | BGCAN betaglycan                                                                 |
| THRA      | 7067   | thyroid hormone receptor alpha                                  | AR7 CHNG6 EAR7 ERB-T-1 ERBA ERBA1 NR1A1 THRA1 THRA2 c-ERBA-1                     |
| THRB      | 7068   | thyroid hormone receptor beta                                   | C-ERBA-2 C-ERBA-BETA ERBA2 GRTH NR1A2 PRTH THR1 THRB1 THRB2                      |
| TIE1      | 7075   | tyrosine kinase with immunoglobulin like and EGF like domains 1 | JTK14 TIE                                                                        |
| TNFRSF10A | 8797   | TNF receptor superfamily member 10a                             | APO2 CD261 DR4 TRAILR-1 TRAILR1                                                  |
| TNFRSF10B | 8795   | TNF receptor superfamily member 10b                             | CD262 DR5 KILLER KILLER/DR5 TRAILR2 TRAILR2 TRICK2 TRICK2A TRICK2B TRICKB ZTNFR9 |
| TNFRSF10C | 8794   | TNF receptor superfamily member 10c                             | CD263 DCR1 DCR1-TNFR LIT TRAILR3 TRAILR3 TRID                                    |
| TNFRSF10D | 8793   | TNF receptor superfamily member 10d                             | CD264 DCR2 TRAILR4 TRAILR4 TRUNDD                                                |
| TNFRSF11A | 8792   | TNF receptor superfamily member 11a                             | CD265 FEO LOH18CR1 ODFR OFE OPTB7 OSTS PDB2 RANK TRANCER                         |
| TNFRSF12A | 51330  | TNF receptor superfamily member 12A                             | CD266 FN14 TWEAKR                                                                |
| TNFRSF13B | 23495  | TNF receptor superfamily member 13B                             | CD267 CVID CVID2 IGAD2 RYZN TACI TNFRSF14B                                       |
| TNFRSF13C | 115650 | TNF receptor superfamily member 13C                             | BAFFR BAFFR BROMIX CD268 CVID4 prolixin                                          |
| TNFRSF14  | 8764   | TNF receptor superfamily member 14                              | ATAR CD270 HVEA HVEM LIGHTR TR2                                                  |
| TNFRSF17  | 608    | TNF receptor superfamily member 17                              | BCM BCMA CD269 TNFRSF13A                                                         |
| TNFRSF18  | 8784   | TNF receptor superfamily member 18                              | AITR CD357 ENERGEN GITR GITR-D                                                   |
| TNFRSF19  | 55504  | TNF receptor superfamily member 19                              | TAJ TAJ-alpha TRADE TROY                                                         |
| TNFRSF1A  | 7132   | TNF receptor superfamily member 1A                              | CD120a FPF TBP1 TNF-R TNF-R-I TNFR55 TNFAR TNFR1 TNFR55 TNFR60 p55 p55-R p60     |
| TNFRSF1B  | 7133   | TNF receptor superfamily member 1B                              | CD120b TBPII TNF-R-II TNFR75 TNFBR TNFR1B TNFR2 TNFR80 p75 p75TNFR               |
| TNFRSF21  | 27242  | TNF receptor superfamily member 21                              | BM-018 CD358 DR6                                                                 |
| TNFRSF25  | 8718   | TNF receptor superfamily member 25                              | APO-3 DDR3 DR3 GEF720 LARD PLEKHG5 TNFRSF12 TR3 TRAMP WSL-1 WSL-LR               |
| TNFRSF4   | 7293   | TNF receptor superfamily member 4                               | ACT35 CD134 IMD16 OX40 TXGP1L                                                    |
| TNFRSF6B  | 8771   | TNF receptor superfamily member 6b                              | DCR3 DJ583P15.1.1 M68 M68E TR6                                                   |
| TNFRSF8   | 943    | TNF receptor superfamily member 8                               | CD30 D1S166E Ki-1                                                                |

|         |        |                                              |                                                                                    |
|---------|--------|----------------------------------------------|------------------------------------------------------------------------------------|
| TNFRSF9 | 3604   | TNF receptor superfamily member 9            | 4-1BB CD137 CDw137 ILA                                                             |
| TRHR    | 7201   | thyrotropin releasing hormone receptor       | CHNG7 TRH-R                                                                        |
| TSHR    | 7253   | thyroid stimulating hormone receptor         | CHNG1 LGR3 hTSHR-I                                                                 |
| TUBB3   | 10381  | tubulin beta 3 class III                     | CDCBM CDCBM1 CFEOM3 CFEOM3A FEOM3 TUBB4 beta-4                                     |
| VDR     | 7421   | vitamin D receptor                           | NR1I1 PPP1R163                                                                     |
| VIPR1   | 7433   | vasoactive intestinal peptide receptor 1     | HVR1 III PACAP-R-2 PACAP-R2 RDC1 V1RG VAPC1 VIP-R-1 VIPR VIRG VPAC1 VPAC1R VPCAP1R |
| VIPR2   | 7434   | vasoactive intestinal peptide receptor 2     | C16DUPq36.3 DUP7q36.3 PACAP-R-3 PACAP-R3 VIP-R-2 VPAC2 VPAC2R VPCAP2R              |
| XCR1    | 2829   | X-C motif chemokine receptor 1               | CCXCR1 GPR5                                                                        |
| IFNA10  | 3446   | interferon alpha 10                          | IFN-alphaC                                                                         |
| IFNA13  | 3447   | interferon alpha 13                          | -                                                                                  |
| IFNA14  | 3448   | interferon alpha 14                          | IFN-alphaH LEIF2H                                                                  |
| IFNA16  | 3449   | interferon alpha 16                          | IFN-alpha-16 IFN-alphaO                                                            |
| IFNA17  | 3451   | interferon alpha 17                          | IFN-alphaI IFNA INFA LEIF2C1                                                       |
| IFNA2   | 3440   | interferon alpha 2                           | IFN-alpha-2 IFN-alphaA IFNA IFNA2B leIF A                                          |
| IFNA21  | 3452   | interferon alpha 21                          | IFN-alphaI leIF F leIF-F                                                           |
| IFNA4   | 3441   | interferon alpha 4                           | IFN-alpha4a INFA4                                                                  |
| IFNA5   | 3442   | interferon alpha 5                           | IFN-alpha-5 IFN-alphaG INA5 INFA5 leIF G                                           |
| IFNA6   | 3443   | interferon alpha 6                           | IFN-alphaK                                                                         |
| IFNA7   | 3444   | interferon alpha 7                           | IFN-alphaJ IFNA-J                                                                  |
| IFNA8   | 3445   | interferon alpha 8                           | IFN-alphaB                                                                         |
| IFNB1   | 3456   | interferon beta 1                            | IFB IFF IFN-beta IFNB                                                              |
| IFNE    | 338376 | interferon epsilon                           | IFN-E IFNE1 IFNT1 INFE1 PRO655                                                     |
| IFNG    | 3458   | interferon gamma                             | IFG IFI                                                                            |
| IFNK    | 56832  | interferon kappa                             | IFNT1 INFE1                                                                        |
| IFNW1   | 3467   | interferon omega 1                           | -                                                                                  |
| IFNAR2  | 3455   | interferon alpha and beta receptor subunit 2 | IFN-R IFN-alpha-REC IFNABR IFNARB IMD45                                            |
| IFNGR1  | 3459   | interferon gamma receptor 1                  | CD119 IFNGR IMD27A IMD27B                                                          |
| IFNGR2  | 3460   | interferon gamma receptor 2                  | AF-1 IFGR2 IFNGT1 IMD28                                                            |
| IL11    | 3589   | interleukin 11                               | AGIF IL-11                                                                         |
| IL12A   | 3592   | interleukin 12A                              | CLMF IL-12A NFSK NKSF1 P35                                                         |
| IL12B   | 3593   | interleukin 12B                              | CLMF CLMF2 IL-12B IMD28 IMD29 NKSF NKSF2                                           |
| IL13    | 3596   | interleukin 13                               | IL-13 P600                                                                         |
| IL15    | 3600   | interleukin 15                               | IL-15                                                                              |
| IL16    | 3603   | interleukin 16                               | LCF NIL16 PRIL16 prIL-16                                                           |
| IL17A   | 3605   | interleukin 17A                              | CTLA-8 CTLA8 IL-17 IL-17A IL17                                                     |
| IL17B   | 27190  | interleukin 17B                              | IL-17B IL-20 NIRF ZCYTO7                                                           |
| IL17C   | 27189  | interleukin 17C                              | CX2 IL-17C                                                                         |
| IL17D   | 53342  | interleukin 17D                              | IL-17D                                                                             |
| IL17F   | 112744 | interleukin 17F                              | CANDF6 IL-17F ML-1 ML1                                                             |
| IL18    | 3606   | interleukin 18                               | IGIF IL-18 IL-1g IL1F4                                                             |
| IL19    | 29949  | interleukin 19                               | IL-10C MDA1 NG.1 ZMDA1                                                             |

|        |        |                                       |                                                                               |
|--------|--------|---------------------------------------|-------------------------------------------------------------------------------|
| IL1A   | 3552   | interleukin 1 alpha                   | IL-1 alpha IL-1A IL1 IL1-ALPHA IL1F1                                          |
| IL1B   | 3553   | interleukin 1 beta                    | IL-1 IL1-BETA IL1F2 IL1beta                                                   |
| IL1F10 | 84639  | interleukin 1 family member 10        | FIL1-theta FKSG75 IL-1HY2 IL-38 IL1-theta IL1HY2                              |
| IL36RN | 26525  | interleukin 36 receptor antagonist    | FIL1 FIL1(DELTA) FIL1D IL-36Ra IL1F5 IL1HY1 IL1L1 IL1RP3 IL36RA PSORP PSORS14 |
| IL36A  | 27179  | interleukin 36 alpha                  | FIL1 FIL1(EPSILON) FIL1E IL-1F6 IL1(EPSILON) IL1F6                            |
| IL37   | 27178  | interleukin 37                        | FIL1 FIL1(ZETA) FIL1Z IL-1F7 IL-1H IL-1H4 IL-1RP1 IL-37 IL1F7 IL1H4 IL1RP1    |
| IL36B  | 27177  | interleukin 36 beta                   | FIL1 FIL1-(ETA) FIL1H FILI-(ETA) IL-1F8 IL-1H2 IL1-ETA IL1F8 IL1H2            |
| IL36G  | 56300  | interleukin 36 gamma                  | IL-1F9 IL-1H1 IL-1RP2 IL1E IL1F9 IL1H1 IL1RP2                                 |
| IL1RN  | 3557   | interleukin 1 receptor antagonist     | DIRA ICIL-1RA IL-1RN IL-1ra IL-1ra3 IL1F3 IL1RA IRAP MVCD4                    |
| IL2    | 3558   | interleukin 2                         | IL-2 TCGF lymphokine                                                          |
| IL20   | 50604  | interleukin 20                        | IL-20 IL10D ZCYTO10                                                           |
| IL21   | 59067  | interleukin 21                        | CVID11 IL-21 Za11                                                             |
| IL22   | 50616  | interleukin 22                        | IL-21 IL-22 IL-D110 IL-TIF ILTIF TIFIL-23 TIFa zcyto18                        |
| IL23A  | 51561  | interleukin 23 subunit alpha          | IL-23 IL-23A IL23P19 P19 SGRF                                                 |
| IL24   | 11009  | interleukin 24                        | C49A FISP IL10B MDA7 MOB5 ST16                                                |
| IL25   | 64806  | interleukin 25                        | IL17E                                                                         |
| IL26   | 55801  | interleukin 26                        | AK155 IL-26                                                                   |
| IL27   | 246778 | interleukin 27                        | IL-27 IL-27A IL27A IL27p28 IL30 p28                                           |
| IFNL2  | 282616 | interferon lambda 2                   | IL-28A IL28A                                                                  |
| IFNL3  | 282617 | interferon lambda 3                   | IFN-lambda-3 IFN-lambda-4 IL-28B IL-28C IL28B IL28C                           |
| IFNL1  | 282618 | interferon lambda 1                   | IL-29 IL29                                                                    |
| IL3    | 3562   | interleukin 3                         | IL-3 MCGF MULTI-CSF                                                           |
| IL31   | 386653 | interleukin 31                        | IL-31                                                                         |
| IL32   | 9235   | interleukin 32                        | IL-32alpha IL-32beta IL-32delta IL-32gamma NK4 TAIF TAIFa TAIFb TAIFc TAIFd   |
| IL33   | 90865  | interleukin 33                        | C9orf26 DVS27 IL1F11 NF-HEV NFEHEV                                            |
| IL34   | 146433 | interleukin 34                        | C16orf77 IL-34                                                                |
| IL4    | 3565   | interleukin 4                         | BCGF-1 BCGF1 BSF-1 BSF1 IL-4                                                  |
| IL5    | 3567   | interleukin 5                         | EDF IL-5 TRF                                                                  |
| IL6    | 3569   | interleukin 6                         | BSF-2 BSF2 CDF HGF HSF IFN-beta-2 IFNB2 IL-6                                  |
| IL6ST  | 3572   | interleukin 6 signal transducer       | CD130 CDW130 GP130 HIES4 IL-6RB sGP130                                        |
| IL7    | 3574   | interleukin 7                         | IL-7                                                                          |
| CXCL8  | 3576   | C-X-C motif chemokine ligand 8        | GCP-1 GCP1 IL8 LECT LUCT LYNAP MDNCF MONAP NAF NAP-1 NAP1 SCYB8               |
| IL9    | 3578   | interleukin 9                         | HP40 IL-9 P40                                                                 |
| TXLNA  | 200081 | taxilin alpha                         | IL14 TXLN                                                                     |
| IL10RA | 3587   | interleukin 10 receptor subunit alpha | CD210 CD210a CDW210A HIL-10R IL-10R1 IL10R                                    |

|         |        |                                           |                                                                                      |
|---------|--------|-------------------------------------------|--------------------------------------------------------------------------------------|
| IL10RB  | 3588   | interleukin 10 receptor subunit beta      | CDW210B CRF2-4 CRFB4 D21S58 D21S66 IL-10R2                                           |
| IL11RA  | 3590   | interleukin 11 receptor subunit alpha     | CRSDA                                                                                |
| IL12RB1 | 3594   | interleukin 12 receptor subunit beta 1    | CD212 IL-12R-BETA1 IL12RB IMD30                                                      |
| IL12RB2 | 3595   | interleukin 12 receptor subunit beta 2    | -                                                                                    |
| IL13RA1 | 3597   | interleukin 13 receptor subunit alpha 1   | CD213A1 CT19 IL-13Ra NR4                                                             |
| IL13RA2 | 3598   | interleukin 13 receptor subunit alpha 2   | CD213A2 CT19 IL-13R IL13BP                                                           |
| IL15RA  | 3601   | interleukin 15 receptor subunit alpha     | CD215                                                                                |
| IL2RB   | 3560   | interleukin 2 receptor subunit            | CD122 IL15RB IMD63 P70-75                                                            |
| IL17RA  | 23765  | interleukin 17 receptor A                 | CANDF5 CD217 CDw217 IL-17RA IL17R IMD51 hIL-17R                                      |
| IL17RB  | 55540  | interleukin 17 receptor B                 | CRL4 EVI27 IL17BR IL17RH1                                                            |
| IL17RC  | 84818  | interleukin 17 receptor C                 | CANDF9 IL17-RL IL17RL                                                                |
| IL17RD  | 54756  | interleukin 17 receptor D                 | HH18 IL-17RD IL17RLM SEF                                                             |
| IL17RE  | 132014 | interleukin 17 receptor E                 | -                                                                                    |
| IL18R1  | 8809   | interleukin 18 receptor 1                 | CD218a CDw218a IL-18R-alpha IL-18Ralpha IL-1Rrp IL18RA IL18Ralpha2 IL1RRP            |
| IL18RAP | 8807   | interleukin 18 receptor accessory protein | ACPL CD218b CDw218b IL-18R-beta IL-18RAcP IL-18Rbeta IL-1R-7 IL-1R7 IL-1RAcPL IL18RB |
| IL1R1   | 3554   | interleukin 1 receptor type 1             | CD121A D2S1473 IL-1R-alpha IL1R IL1RA P80                                            |
| IL1R2   | 7850   | interleukin 1 receptor type 2             | CD121b CDw121b IL-1R-2 IL-1RT-2 IL-1RT2 IL1R2c IL1RB                                 |
| IL1RAP  | 3556   | interleukin 1 receptor accessory protein  | C3orf13 IL-1RAcP IL1R3                                                               |
| IL1RL1  | 9173   | interleukin 1 receptor like 1             | DER4 FIT-1 IL33R ST2 ST2L ST2V T1                                                    |
| IL1RL2  | 8808   | interleukin 1 receptor like 2             | IL-1Rrp2 IL-36R IL1R-rp2 IL1RRP2                                                     |
| IL20RA  | 53832  | interleukin 20 receptor subunit alpha     | CRF2-8 IL-20R-alpha IL-20R1 IL-20RA                                                  |
| IL20RB  | 53833  | interleukin 20 receptor subunit beta      | DIRS1 FNDC6 IL-20R2                                                                  |
| IL21R   | 50615  | interleukin 21 receptor                   | CD360 IMD56 NILR                                                                     |
| IL22RA1 | 58985  | interleukin 22 receptor subunit alpha 1   | CRF2-9 IL22R IL22R1                                                                  |
| IL22RA2 | 116379 | interleukin 22 receptor subunit alpha 2   | CRF2-10 CRF2-S1 CRF2X IL-22BP IL-22R-alpha-2 IL-22RA2 ZCYTOR16                       |
| IL23R   | 149233 | interleukin 23 receptor                   | -                                                                                    |
| IL27RA  | 9466   | interleukin 27 receptor subunit alpha     | CRL1 IL-27RA IL27R TCCR WSX1 zcytor1                                                 |
| IFNLR1  | 163702 | interferon lambda receptor 1              | CRF2/12 IFNLR IL-28R1 IL28RA LICR2                                                   |
| IL2RA   | 3559   | interleukin 2 receptor subunit alpha      | CD25 IDDM10 IL2R IMD41 TCGFR p55                                                     |
| IL2RB   | 3560   | interleukin 2 receptor subunit            | CD122 IL15RB IMD63 P70-75                                                            |
| IL2RG   | 3561   | interleukin 2 receptor subunit gamma      | CD132 CIDX IL-2RG IMD4 P64 SCIDX SCIDX1                                              |

|          |        |                                                                                        |                                                                                                    |
|----------|--------|----------------------------------------------------------------------------------------|----------------------------------------------------------------------------------------------------|
| IL31RA   | 133396 | interleukin 31 receptor A                                                              | CRL CRL3 GLM-R GLMR GPL IL-31RA PLCA2 PRO21384 hGLM-R                                              |
| IL3RA    | 3563   | interleukin 3 receptor subunit alpha                                                   | CD123 IL3R IL3RAY IL3RX IL3RY hIL-3Ra                                                              |
| IL4R     | 3566   | interleukin 4 receptor                                                                 | CD124 IL-4RA IL4RA                                                                                 |
| IL5RA    | 3568   | interleukin 5 receptor subunit alpha                                                   | CD125 CDw125 HSIL5R3 IL5R                                                                          |
| IL6R     | 3570   | interleukin 6 receptor                                                                 | CD126 IL-6R-1 IL-6RA IL6Q IL6RA IL6RQ gp80                                                         |
| IL7R     | 3575   | interleukin 7 receptor                                                                 | CD127 CDW127 IL-7R-alpha IL7RA ILRA                                                                |
| CXCR1    | 3577   | C-X-C motif chemokine receptor 1                                                       | C-C C-C-CKR-1 CD128 CD181 CDw128a CKR-1 CMKAR1 IL8R1 IL8RA IL8RBA                                  |
| CXCR2    | 3579   | C-X-C motif chemokine receptor 2                                                       | CD182 CDw128b CMKAR2 IL8R2 IL8RA L8RB                                                              |
| IL9R     | 3581   | interleukin 9 receptor                                                                 | CD129 IL-9R                                                                                        |
| ST2      | 6761   | -                                                                                      | -                                                                                                  |
| HLA-A    | 3105   | major histocompatibility complex, class I, A                                           | HAAA                                                                                               |
| HLA-B    | 3106   | major histocompatibility complex, class I, B                                           | AS B-4901 HLAB                                                                                     |
| HLA-C    | 3107   | major histocompatibility complex, class I, C                                           | D6S204 HLA-JY3 HLAC HLC-C MHC PSORS1                                                               |
| HLA-E    | 3133   | major histocompatibility complex, class I, E                                           | HLA-6.2 QA1                                                                                        |
| HLA-G    | 3135   | major histocompatibility complex, class I, G                                           | MHC-G                                                                                              |
| KIR3DL1  | 3811   | killer cell immunoglobulin like receptor, three Ig domains and long cytoplasmic tail 1 | CD158E1 KIR KIR3DL1/S1 NKAT-3 NKAT3 NKB1 NKB1B                                                     |
| KIR3DL2  | 3812   | killer cell immunoglobulin like receptor, three Ig domains and long cytoplasmic tail 2 | 3DL2 CD158K KIR-3DL2 NKAT-4 NKAT4 NKAT4B p140                                                      |
| KIR2DL1  | 3802   | killer cell immunoglobulin like receptor, two Ig domains and long cytoplasmic tail 1   | CD158A KIR-K64 KIR221 KIR2DL3 NKAT NKAT-1 NKAT1 p58.1                                              |
| KIR2DL2  | 3803   | killer cell immunoglobulin like receptor, two Ig domains and long cytoplasmic tail 2   | CD158B1 CD158b NKAT-6 NKAT6 p58.2                                                                  |
| KIR2DL3  | 3804   | killer cell immunoglobulin like receptor, two Ig domains and long cytoplasmic tail 3   | CD158B2 CD158b GL183 KIR-023GB KIR-K7b KIR-K7c KIR2DL KIR2DS5 KIRCL23 NKAT NKAT2 NKAT2A NKAT2B p58 |
| KIR2DL4  | 3805   | killer cell immunoglobulin like receptor, two Ig domains and long cytoplasmic tail 4   | CD158D G9P KIR-103AS KIR-2DL4 KIR103 KIR103AS                                                      |
| KIR2DL5A | 57292  | killer cell immunoglobulin like receptor, two Ig domains and long cytoplasmic tail 5A  | CD158F KIR2DL5 KIR2DL5.1 KIR2DL5.3                                                                 |
| KLRC1    | 3821   | killer cell lectin like receptor C1                                                    | CD159A NKG2 NKG2A                                                                                  |
| KLRC2    | 3822   | killer cell lectin like receptor C2                                                    | CD159c NKG2-C NKG2C                                                                                |
| KLRC3    | 3823   | killer cell lectin like receptor C3                                                    | NKG2-E NKG2E                                                                                       |
| KLRD1    | 3824   | killer cell lectin like receptor D1                                                    | CD94                                                                                               |

|         |       |                                                                                       |                                                                            |
|---------|-------|---------------------------------------------------------------------------------------|----------------------------------------------------------------------------|
| PTPN6   | 5777  | protein tyrosine phosphatase non-receptor type 6                                      | HCP HCPH HPTP1C PTP-1C SH-PTP1 SHP-1 SHP-1L SHP1                           |
| PTPN11  | 5781  | protein tyrosine phosphatase non-receptor type 11                                     | BPTP3 CFC JMML METCDS NS1 PTP-1D PTP2C SH-PTP2 SH-PTP3 SHP2                |
| ICAM1   | 3383  | intercellular adhesion molecule 1                                                     | BB2 CD54 P3.58                                                             |
| ICAM2   | 3384  | intercellular adhesion molecule 2                                                     | CD102                                                                      |
| ITGAL   | 3683  | integrin subunit alpha L                                                              | CD11A LFA-1 LFA1A                                                          |
| ITGB2   | 3689  | integrin subunit beta 2                                                               | CD18 LAD LCAMB LFA-1 MAC-1 MF17 MFI7                                       |
| PTK2B   | 2185  | protein tyrosine kinase 2 beta                                                        | CADTK CAKB FADK2 FAK2 PKB PTK PYK2 RAFTK                                   |
| VAV3    | 10451 | vav guanine nucleotide exchange factor 3                                              | -                                                                          |
| VAV1    | 7409  | vav guanine nucleotide exchange factor 1                                              | VAV                                                                        |
| VAV2    | 7410  | vav guanine nucleotide exchange factor 2                                              | VAV-2                                                                      |
| RAC1    | 5879  | Rac family small GTPase 1                                                             | MIG5 MRD48 Rac-1 TC-25 p21-Rac1                                            |
| RAC2    | 5880  | Rac family small GTPase 2                                                             | EN-7 Gx HSPC022 p21-Rac2                                                   |
| RAC3    | 5881  | Rac family small GTPase 3                                                             | -                                                                          |
| PAK1    | 5058  | p21 (RAC1) activated kinase 1                                                         | IDDMSSD PAKalpha alpha-PAK p65-PAK                                         |
| MAP2K1  | 5604  | mitogen-activated protein kinase kinase 1                                             | CFC3 MAPKK1 MEK1 MKK1 PRKMK1                                               |
| MAP2K2  | 5605  | mitogen-activated protein kinase kinase 2                                             | CFC4 MAPKK2 MEK2 MKK2 PRKMK2                                               |
| MAPK1   | 5594  | mitogen-activated protein kinase 1                                                    | ERK ERK-2 ERK2 ERT1 MAPK2 P42MAPK PRKM1 PRKM2 p38 p40 p41 p41mapk p42-MAPK |
| MAPK3   | 5595  | mitogen-activated protein kinase 3                                                    | ERK-1 ERK1 ERT2 HS44KDAP HUMKER1A P44ERK1 P44MAPK PRKM3 p44-ERK1 p44-MAPK  |
| TNF     | 7124  | tumor necrosis factor                                                                 | DIF TNF-alpha TNFA TNFSF2 TNLG1F                                           |
| CSF2    | 1437  | colony stimulating factor 2                                                           | CSF GMCSF                                                                  |
| IFNG    | 3458  | interferon gamma                                                                      | IFG IFI                                                                    |
| KIR2DS1 | 3806  | killer cell immunoglobulin like receptor, two Ig domains and short cytoplasmic tail 1 | CD158H CD158a p50.1                                                        |
| KIR2DS3 | 3808  | killer cell immunoglobulin like receptor, two Ig domains and short cytoplasmic tail 3 | NKAT7                                                                      |
| KIR2DS4 | 3809  | killer cell immunoglobulin like receptor, two Ig domains and short cytoplasmic tail 4 | CD158I KIR-2DS4 KIR1D KIR412 KKA3 NKAT-8 NKAT8                             |
| KIR2DS5 | 3810  | killer cell immunoglobulin like receptor, two Ig domains and short cytoplasmic tail 5 | CD158G NKAT9                                                               |
| NCR2    | 9436  | natural cytotoxicity triggering receptor 2                                            | CD336 LY95 NK-p44 NKP44 dJ149M18.1                                         |
| TYROBP  | 7305  | transmembrane immune signaling adaptor TYROBP                                         | DAP12 KARAP PLOSL PLOSL1                                                   |
| LCK     | 3932  | LCK proto-oncogene, Src family tyrosine kinase                                        | IMD22 LSK YT16 p56lck pp58lck                                              |

|        |        |                                                                        |                                                                 |
|--------|--------|------------------------------------------------------------------------|-----------------------------------------------------------------|
| FCGR3A | 2214   | Fc fragment of IgG receptor IIIa                                       | CD16 CD16A FCG3 FCGR3 FCGRIII FCR-10 FCRIII FCRIIIA IGFR3 IMD20 |
| FCGR3B | 2215   | Fc fragment of IgG receptor IIIb                                       | CD16 CD16A CD16b FCG3 FCGR3 FCGR3A FCR-10 FCRIII FCRIIIb        |
| NCR1   | 9437   | natural cytotoxicity triggering receptor 1                             | CD335 LY94 NK-p46 NKP46                                         |
| NCR3   | 259197 | natural cytotoxicity triggering receptor 3                             | 1C7 CD337 LY117 MALS NKp30                                      |
| FCER1G | 2207   | Fc fragment of IgE receptor Ig                                         | FCRG                                                            |
| CD247  | 919    | CD247 molecule                                                         | CD3-ZETA CD3H CD3Q CD3Z IMD25 T3Z TCRZ                          |
| ZAP70  | 7535   | zeta chain of T cell receptor associated protein kinase 70             | ADMIO2 IMD48 SRK STCD STD TZK ZAP-70                            |
| SYK    | 6850   | spleen associated tyrosine                                             | p72-Syk                                                         |
| LCP2   | 3937   | lymphocyte cytosolic protein 2                                         | SLP-76 SLP76                                                    |
| LAT    | 27040  | linker for activation of T cells                                       | IMD52 LAT1 pp36                                                 |
| PLCG1  | 5335   | phospholipase C gamma 1                                                | NCKAP3 PLC-II PLC1 PLC148 PLCgamma1                             |
| PLCG2  | 5336   | phospholipase C gamma 2                                                | APLAID FCAS3 PLC-IV PLC-gamma-2                                 |
| SH3BP2 | 6452   | SH3 domain binding protein 2                                           | 3BP-2 3BP2 CRBM CRPM RES4-23                                    |
| PIK3CA | 5290   | phosphatidylinositol-4,5-bisphosphate 3-kinase catalytic subunit alpha | CLAPO CLOVE CWS5 MCAP MCM MCMTC PI3K PI3K-alpha p110-alpha      |
| PIK3CB | 5291   | phosphatidylinositol-4,5-bisphosphate 3-kinase catalytic subunit beta  | P110BETA PI3K PI3KBETA PIK3C1                                   |
| PIK3CD | 5293   | phosphatidylinositol-4,5-bisphosphate 3-kinase catalytic subunit delta | APDS IMD14 P110DELTA PI3K p110D                                 |
| PIK3CG | 5294   | phosphatidylinositol-4,5-bisphosphate 3-kinase catalytic subunit gamma | PI3CG PI3K PI3Kgamma PIK3 p110gamma p120-PI3K                   |
| PIK3R5 | 23533  | phosphoinositide-3-kinase regulatory subunit 5                         | F730038 15Rik FOAP-2 P101-PI3K p101                             |
| PIK3R1 | 5295   | phosphoinositide-3-kinase regulatory subunit 1                         | AGM7 GRB1 IMD36 p85 p85-ALPHA                                   |
| PIK3R2 | 5296   | phosphoinositide-3-kinase regulatory subunit 2                         | MPPH MPPH1 P85B p85 p85-BETA                                    |
| PIK3R3 | 8503   | phosphoinositide-3-kinase regulatory subunit 3                         | p55 p55-GAMMA p55PIK                                            |
| FYN    | 2534   | FYN proto-oncogene, Src family tyrosine kinase                         | SLK SYN p59-FYN                                                 |
| SHC2   | 25759  | SHC adaptor protein 2                                                  | SCK SHCB SLI                                                    |
| SHC4   | 399694 | SHC adaptor protein 4                                                  | RaLP SHCD                                                       |
| SHC3   | 53358  | SHC adaptor protein 3                                                  | N-Shc NSHC RAI SHCC                                             |
| SHC1   | 6464   | SHC adaptor protein 1                                                  | SHC SHCA                                                        |
| GRB2   | 2885   | growth factor receptor bound protein 2                                 | ASH EGFRBP-GRB2 Grb3-3 MST084 MSTP084 NCKAP2                    |
| SOS1   | 6654   | SOS Ras/Rac guanine nucleotide exchange factor 1                       | GF1 GGF1 GINGF HGF NS4 SOS-1                                    |
| SOS2   | 6655   | SOS Ras/Rho guanine nucleotide exchange factor 2                       | NS9 SOS-2                                                       |



|        |       |                                                   |                                                                                                                                |
|--------|-------|---------------------------------------------------|--------------------------------------------------------------------------------------------------------------------------------|
| HRAS   | 3265  | HRas proto-oncogene, GTPase                       | C-BAS/HAS C-H-RAS C-HA-RAS1 CTLO H-RASIDX HAMSV HRAS1 RASH1 p21ras                                                             |
| KRAS   | 3845  | KRAS proto-oncogene, GTPase                       | 'C-K-RAS C-K-RAS CFC2 K-RAS2A K-RAS2B K-RAS4A K-RAS4B K-Ras K-Ras2 KI-RAS KRAS1 KRAS2 NS NS3 OES RALD RASK2 c-Ki-ras c-Ki-ras2 |
| NRAS   | 4893  | NRAS proto-oncogene, GTPase                       | ALPS4 CMNS N-ras NCMS NRAS1 NS6                                                                                                |
| ARAF   | 369   | A-Raf proto-oncogene, serine/threonine kinase     | A-RAF ARAF1 PKS2 RAFA1                                                                                                         |
| BRAF   | 673   | B-Raf proto-oncogene, serine/threonine kinase     | B-RAF1 B-raf BRAF1 NS7 RAFB1                                                                                                   |
| RAF1   | 5894  | Raf-1 proto-oncogene, serine/threonine kinase     | CMD1NN CRAF NS5 Raf-1 c-Raf                                                                                                    |
| MICA   | 1E+08 | MHC class I polypeptide-related sequence A        | MIC-A PERB11.1                                                                                                                 |
| MICB   | 4277  | MHC class I polypeptide-related sequence B        | PERB11.2                                                                                                                       |
| ULBP3  | 79465 | UL16 binding protein 3                            | N2DL-3 NKG2DL3 RAET1N                                                                                                          |
| ULBP2  | 80328 | UL16 binding protein 2                            | ALCAN-alpha N2DL2 NKG2DL2 RAET1H RAET1L                                                                                        |
| ULBP1  | 80329 | UL16 binding protein 1                            | N2DL-1 NKG2DL1 RAET1I                                                                                                          |
| KLRK1  | 22914 | killer cell lectin like receptor K1               | CD314 D12S2489E KLR NKG2-D NKG2D                                                                                               |
| HCST   | 10870 | hematopoietic cell signal transducer              | DAP10 KAP10 PIK3AP                                                                                                             |
| CD48   | 962   | CD48 molecule                                     | BCM1 BLAST BLAST1 MEM-102 SLAMF2 hCD48 mCD48                                                                                   |
| CD244  | 51744 | CD244 molecule                                    | 2B4 NAIL NKR2B4 Nmrk SLAMF4                                                                                                    |
| PPP3CA | 5530  | protein phosphatase 3 catalytic subunit alpha     | ACCIID CALN CALNA CALNA1 CCN1 CNA1 IECEE IECEE1 PPP2B                                                                          |
| PPP3CB | 5532  | protein phosphatase 3 catalytic subunit beta      | CALNA2 CALNB CNA2 PP2Bbeta                                                                                                     |
| PPP3CC | 5533  | protein phosphatase 3 catalytic subunit gamma     | CALNA3 CNA3 PP2Bgamma                                                                                                          |
| CHP1   | 11261 | calcineurin like EF-hand protein 1                | CHP SLC9A1BP SPAX9 Sid470p p22 p24                                                                                             |
| PPP3R1 | 5534  | protein phosphatase 3 regulatory subunit B, alpha | CALNB1 CNB CNB1                                                                                                                |
| PPP3R2 | 5535  | protein phosphatase 3 regulatory subunit B, beta  | PPP3RL                                                                                                                         |
| CHP2   | 63928 | calcineurin like EF-hand protein 2                | -                                                                                                                              |
| NFAT5  | 10725 | nuclear factor of activated T cells 5             | NF-AT5 NFATL1 NFATZ OREBP TONEBP                                                                                               |
| NFATC1 | 4772  | nuclear factor of activated T cells 1             | NF-ATC NF-ATc1.2 NFAT2 NFATc                                                                                                   |
| NFATC2 | 4773  | nuclear factor of activated T cells 2             | NFAT1 NFATP                                                                                                                    |
| NFATC3 | 4775  | nuclear factor of activated T cells 3             | NF-AT4c NFAT4 NFATX                                                                                                            |
| NFATC4 | 4776  | nuclear factor of activated T cells 4             | NF-AT3 NF-ATC4 NFAT3                                                                                                           |

|           |        |                                              |                                                                                   |
|-----------|--------|----------------------------------------------|-----------------------------------------------------------------------------------|
| PRKCA     | 5578   | protein kinase C alpha                       | AAG6 PKC-alpha PKCA PKCI+/- PKCalpha PRKACA                                       |
| PRKCB     | 5579   | protein kinase C beta                        | PKC-beta PKCB PKCI(2) PKCbeta PRKCB1 PRKCB2                                       |
| PRKCG     | 5582   | protein kinase C gamma                       | PKC-gamma PKCC PKCG PKCI(3) PKCgamma SCA14                                        |
| SH2D1B    | 117157 | SH2 domain containing 1B                     | EAT2                                                                              |
| SH2D1A    | 4068   | SH2 domain containing 1A                     | DSHP EBVS IMD5 LYP MTCP1 SAP SAP/SH2D1A XLP XLPD XLPD1                            |
| IFNGR1    | 3459   | interferon gamma receptor 1                  | CD119 IFNGR IMD27A IMD27B                                                         |
| IFNGR2    | 3460   | interferon gamma receptor 2                  | AF-1 IFGR2 IFNGT1 IMD28                                                           |
| IFNA1     | 3439   | interferon alpha 1                           | IFL IFN IFN-ALPHA IFN-alphaD IFNA13 IFNA@ leIF D                                  |
| IFNA2     | 3440   | interferon alpha 2                           | IFN-alpha-2 IFN-alphaA IFNA IFNA2B leIF A                                         |
| IFNA4     | 3441   | interferon alpha 4                           | IFN-alpha4a INFA4                                                                 |
| IFNA5     | 3442   | interferon alpha 5                           | IFN-alpha-5 IFN-alphaG INA5 INFA5 leIF G                                          |
| IFNA6     | 3443   | interferon alpha 6                           | IFN-alphaK                                                                        |
| IFNA7     | 3444   | interferon alpha 7                           | IFN-alphaJ IFNA-J                                                                 |
| IFNA8     | 3445   | interferon alpha 8                           | IFN-alphaB                                                                        |
| IFNA10    | 3446   | interferon alpha 10                          | IFN-alphaC                                                                        |
| IFNA13    | 3447   | interferon alpha 13                          | -                                                                                 |
| IFNA14    | 3448   | interferon alpha 14                          | IFN-alphaH LEIF2H                                                                 |
| IFNA16    | 3449   | interferon alpha 16                          | IFN-alpha-16 IFN-alphaO                                                           |
| IFNA17    | 3451   | interferon alpha 17                          | IFN-alphaI IFNA INFA LEIF2C1                                                      |
| IFNA21    | 3452   | interferon alpha 21                          | IFN-alphaI leIF F leIF-F                                                          |
| IFNB1     | 3456   | interferon beta 1                            | IFB IFF IFN-beta IFNB                                                             |
| IFNAR1    | 3454   | interferon alpha and beta receptor subunit 1 | AVP IFN-alpha-REC IFNAR IFNBR IFRC                                                |
| IFNAR2    | 3455   | interferon alpha and beta receptor subunit 2 | IFN-R IFN-alpha-REC IFNABR IFNARB IMD45                                           |
| TNFSF10   | 8743   | TNF superfamily member 10                    | APO2L Apo-2L CD253 TL2 TNLG6A TRAIL                                               |
| TNFRSF10D | 8793   | TNF receptor superfamily member 10d          | CD264 DCR2 TRAIL-R4 TRAILR4 TRUNDD                                                |
| TNFRSF10C | 8794   | TNF receptor superfamily member 10c          | CD263 DCR1 DCR1-TNFR LIT TRAIL-R3 TRAILR3 TRID                                    |
| TNFRSF10B | 8795   | TNF receptor superfamily member 10b          | CD262 DR5 KILLER KILLER/DR5 TRAIL-R2 TRAILR2 TRICK2 TRICK2A TRICK2B TRICKB ZTNFR9 |
| TNFRSF10A | 8797   | TNF receptor superfamily member 10a          | APO2 CD261 DR4 TRAILR-1 TRAILR1                                                   |
| FASLG     | 356    | Fas ligand                                   | ALPS1B APT1LG1 APTL CD178 CD95-L CD95L FASL TNFSF6 TNLG1A                         |
| FAS       | 355    | Fas cell surface death receptor              | ALPS1A APO-1 APT1 CD95 FAS1 FASTM TNFRSF6                                         |
| GZMB      | 3002   | granzyme B                                   | C11 CCPI CGL-1 CGL1 CSP-B CSPB CTLA1 CTSG1 HLP SECT                               |
| PRF1      | 5551   | perforin 1                                   | HPLH2 P1 PFP                                                                      |
| CASP3     | 836    | caspase 3                                    | CPP32 CPP32B SCA-1                                                                |

|        |       |                                                            |                                                       |
|--------|-------|------------------------------------------------------------|-------------------------------------------------------|
| BID    | 637   | BH3 interacting domain death agonist                       | FP497                                                 |
| CD3D   | 915   | CD3d molecule                                              | CD3-DELTA IMD19 T3D                                   |
| CD3E   | 916   | CD3e molecule                                              | IMD18 T3E TCRE                                        |
| CD3G   | 917   | CD3g molecule                                              | CD3-GAMMA IMD17 T3G                                   |
| CD247  | 919   | CD247 molecule                                             | CD3-ZETA CD3H CD3Q CD3Z IMD25 T3Z TCRZ                |
| CD4    | 920   | CD4 molecule                                               | CD4mut                                                |
| CD8A   | 925   | CD8a molecule                                              | CD8 Leu2 p32                                          |
| CD8B   | 926   | CD8b molecule                                              | CD8B1 LEU2 LY3 LYT3 P37                               |
| PTPRC  | 5788  | protein tyrosine phosphatase receptor type C               | B220 CD45 CD45R GP180 LCA LCA LY5 T200                |
| LCK    | 3932  | LCK proto-oncogene, Src family tyrosine kinase             | IMD22 LSK YT16 p56lck pp58lck                         |
| FYN    | 2534  | FYN proto-oncogene, Src family tyrosine kinase             | SLK SYN p59-FYN                                       |
| ZAP70  | 7535  | zeta chain of T cell receptor associated protein kinase 70 | ADMIO2 IMD48 SRK STCD STD TZK ZAP-70                  |
| LCP2   | 3937  | lymphocyte cytosolic protein 2                             | SLP-76 SLP76                                          |
| LAT    | 27040 | linker for activation of T cells                           | IMD52 LAT1 pp36                                       |
| ITK    | 3702  | IL2 inducible T cell kinase                                | EMT LPFS1 LYK PSCTK2                                  |
| TEC    | 7006  | tec protein tyrosine kinase                                | PSCTK4                                                |
| NCK1   | 4690  | NCK adaptor protein 1                                      | NCK NCKalpha nck-1                                    |
| NCK2   | 8440  | NCK adaptor protein 2                                      | GRB4 NCKbeta                                          |
| VAV3   | 10451 | vav guanine nucleotide exchange factor 3                   | -                                                     |
| VAV1   | 7409  | vav guanine nucleotide exchange factor 1                   | VAV                                                   |
| VAV2   | 7410  | vav guanine nucleotide exchange factor 2                   | VAV-2                                                 |
| GRAP2  | 9402  | GRB2 related adaptor protein 2                             | GADS GRAP-2 GRB2L GRBLG GRID GRPL GrbX Grf40 Mona P38 |
| GRB2   | 2885  | growth factor receptor bound protein 2                     | ASH EGFRBP-GRB2 Grb3-3 MST084 MSTP084 NCKAP2          |
| PAK1   | 5058  | p21 (RAC1) activated kinase 1                              | IDDMSSD PAKalpha alpha-PAK p65-PAK                    |
| PAK2   | 5062  | p21 (RAC1) activated kinase 2                              | PAK65 PAKgamma                                        |
| PAK3   | 5063  | p21 (RAC1) activated kinase 3                              | ARA MRX30 MRX47 OPHN3 PAK-3 PAK3beta bPAK beta-PAK    |
| PAK4   | 10298 | p21 (RAC1) activated kinase 4                              | -                                                     |
| PAK6   | 56924 | p21 (RAC1) activated kinase 6                              | PAK5                                                  |
| PAK5   | 57144 | p21 (RAC1) activated kinase 5                              | PAK7                                                  |
| RHOA   | 387   | ras homolog family member A                                | ARH12 ARHA EDFAOB RHO12 RHOH12                        |
| CDC42  | 998   | cell division cycle 42                                     | CDC42Hs G25K TKS                                      |
| PPP3CA | 5530  | protein phosphatase 3 catalytic subunit alpha              | ACCIID CALN CALNA CALNA1 CCN1 CNA1 IECEE IECEE1 PPP2B |
| PPP3CB | 5532  | protein phosphatase 3 catalytic subunit beta               | CALNA2 CALNB CNA2 PP2Bbeta                            |
| PPP3CC | 5533  | protein phosphatase 3 catalytic subunit gamma              | CALNA3 CNA3 PP2Bgamma                                 |
| CHP1   | 11261 | calcineurin like EF-hand protein 1                         | CHP SLC9A1BP SPAX9 Sid470p p22 p24                    |

|        |       |                                                                     |                                                                                                                                |
|--------|-------|---------------------------------------------------------------------|--------------------------------------------------------------------------------------------------------------------------------|
| PPP3R1 | 5534  | protein phosphatase 3 regulatory subunit B, alpha                   | CALNB1 CNB CNB1                                                                                                                |
| PPP3R2 | 5535  | protein phosphatase 3 regulatory subunit B, beta                    | PPP3RL                                                                                                                         |
| CHP2   | 63928 | calcineurin like EF-hand protein 2                                  | -                                                                                                                              |
| NFAT5  | 10725 | nuclear factor of activated T cells 5                               | NF-AT5 NFATL1 NFATZ OREBP TONEBP                                                                                               |
| NFATC1 | 4772  | nuclear factor of activated T cells 1                               | NF-ATC NF-ATc1.2 NFAT2 NFATc                                                                                                   |
| NFATC2 | 4773  | nuclear factor of activated T cells 2                               | NFAT1 NFATP                                                                                                                    |
| NFATC3 | 4775  | nuclear factor of activated T cells 3                               | NF-AT4c NFAT4 NFATX                                                                                                            |
| NFATC4 | 4776  | nuclear factor of activated T cells 4                               | NF-AT3 NF-ATC4 NFAT3                                                                                                           |
| SOS1   | 6654  | SOS Ras/Rac guanine nucleotide exchange factor 1                    | GF1 GGF1 GINGF HGF NS4 SOS-1                                                                                                   |
| SOS2   | 6655  | SOS Ras/Rho guanine nucleotide exchange factor 2                    | NS9 SOS-2                                                                                                                      |
| HRAS   | 3265  | HRas proto-oncogene, GTPase                                         | C-BAS/HAS C-H-RAS C-HA-RAS1 CTLO H-RASIDX HAMSV HRAS1 RASH1 p21ras                                                             |
| KRAS   | 3845  | KRAS proto-oncogene, GTPase                                         | 'C-K-RAS C-K-RAS CFC2 K-RAS2A K-RAS2B K-RAS4A K-RAS4B K-Ras K-Ras2 KI-RAS KRAS1 KRAS2 NS NS3 OES RALD RASK2 c-Ki-ras c-Ki-ras2 |
| NRAS   | 4893  | NRAS proto-oncogene, GTPase                                         | ALPS4 CMNS N-ras NCMS NRAS1 NS6                                                                                                |
| FOS    | 2353  | Fos proto-oncogene, AP-1 transcription factor subunit               | AP-1 C-FOS p55                                                                                                                 |
| JUN    | 3725  | Jun proto-oncogene, AP-1 transcription factor subunit               | AP-1 AP1 c-Jun cJUN p39                                                                                                        |
| CARD11 | 84433 | caspase recruitment domain family member 11                         | BENTA BIMP3 CARMA1 IMD11 IMD11A PPBL                                                                                           |
| BCL10  | 8915  | BCL10 immune signaling adaptor                                      | CARMEN CIPER CLAP IMD37 c-E10 mE10                                                                                             |
| MALT1  | 10892 | MALT1 paracaspase                                                   | IMD12 MLT MLT1 PCASP1                                                                                                          |
| CHUK   | 1147  | component of inhibitor of nuclear factor kappa B kinase complex     | IKBKA IKK-alpha IKK1 IKKA NFKBIKA TCF16                                                                                        |
| IKBKB  | 3551  | inhibitor of nuclear factor kappa B kinase subunit beta             | IKK-beta IKK2 IKKB IMD15 IMD15A IMD15B NFKBIKB                                                                                 |
| IKBKG  | 8517  | inhibitor of nuclear factor kappa B kinase regulatory subunit gamma | AMCBX1 EDAID1 FIP-3 FIP3 Fip3p IKK-gamma IKKAP1 IKKG IMD33 IP IP1 IP2 PD2 NEMO ZC2HC9                                          |
| NFKB1  | 4790  | nuclear factor kappa B subunit 1                                    | CVID12 EBP-1 KBF1 NF-kB NF-kB1 NF-kappa-B1 NF-kappaB NF-kappabeta NFKB-p105 NFKB-p50 NFkappaB                                  |
| RELA   | 5970  | RELA proto-oncogene, NF-kB subunit                                  | CMCU NFKB3 p65                                                                                                                 |
| NFKBIA | 4792  | NFKB inhibitor alpha                                                | EDAID2 IKBA MAD-3 NFKBI                                                                                                        |
| NFKBIB | 4793  | NFKB inhibitor beta                                                 | IKBB TRIP9                                                                                                                     |
| NFKBIE | 4794  | NFKB inhibitor epsilon                                              | IKBE                                                                                                                           |

|         |       |                                                                        |                                                              |
|---------|-------|------------------------------------------------------------------------|--------------------------------------------------------------|
| CD28    | 940   | CD28 molecule                                                          | Tp44                                                         |
| ICOS    | 29851 | inducible T cell costimulator                                          | AILIM CD278 CVID1                                            |
| CD40LG  | 959   | CD40 ligand                                                            | CD154 CD40L HIGM1 IGM IMD3 T-BAM TNFSF5 TRAP gp39 hCD40L     |
| PIK3R5  | 23533 | phosphoinositide-3-kinase regulatory subunit 5                         | F730038115Rik FOAP-2 P101-PI3K p101                          |
| PIK3R1  | 5295  | phosphoinositide-3-kinase regulatory subunit 1                         | AGM7 GRB1 IMD36 p85 p85-ALPHA                                |
| PIK3R2  | 5296  | phosphoinositide-3-kinase regulatory subunit 2                         | MPPH MPPH1 P85B p85 p85-BETA                                 |
| PIK3R3  | 8503  | phosphoinositide-3-kinase regulatory subunit 3                         | p55 p55-GAMMA p55PIK                                         |
| PIK3CA  | 5290  | phosphatidylinositol-4,5-bisphosphate 3-kinase catalytic subunit alpha | CLAPO CLOVE CWS5 MCAP MCM MCM TC PI3K PI3K-alpha p110-alpha  |
| PIK3CB  | 5291  | phosphatidylinositol-4,5-bisphosphate 3-kinase catalytic subunit beta  | P110BETA PI3K PI3KBETA PIK3C1                                |
| PIK3CD  | 5293  | phosphatidylinositol-4,5-bisphosphate 3-kinase catalytic subunit delta | APDS IMD14 P110DELTA PI3K p110D                              |
| PIK3CG  | 5294  | phosphatidylinositol-4,5-bisphosphate 3-kinase catalytic subunit gamma | PI3CG PI3K PI3Kgamma PIK3 p110gamma p120-PI3K                |
| AKT3    | 10000 | AKT serine/threonine kinase 3                                          | MPPH MPPH2 PKB-GAMMA PKBG PRKBG RAC-PK-gamma RAC-gamma STK-2 |
| AKT1    | 207   | AKT serine/threonine kinase 1                                          | AKT CWS6 PKB PKB-ALPHA PRKBA RAC RAC-ALPHA                   |
| AKT2    | 208   | AKT serine/threonine kinase 2                                          | HIHGHH PKBB PKBBETA PRKBB RAC-BETA                           |
| MAP3K8  | 1326  | mitogen-activated protein kinase kinase kinase 8                       | AURA2 COT EST ESTF MEKK8 TPL2 Tpi-2 c-COT                    |
| MAP3K14 | 9020  | mitogen-activated protein kinase kinase kinase 14                      | FTDCR1B HS HSNIK NIK                                         |
| PDCD1   | 5133  | programmed cell death 1                                                | CD279 PD-1 PD1 SLEB2 hPD-1 hPD-1 hSLE1                       |
| CTLA4   | 1493  | cytotoxic T-lymphocyte associated protein 4                            | ALPS5 CD CD152 CELIAC3 CTLA-4 GRD4 GSE IDDM12                |
| PTPN6   | 5777  | protein tyrosine phosphatase non-receptor type 6                       | HCP HCPH HPTP1C PTP-1C SH-PTP1 SHP-1 SHP-1L SHP1             |
| CBLC    | 23624 | Cbl proto-oncogene C                                                   | CBL-3 CBL-SL RNF57                                           |
| CBL     | 867   | Cbl proto-oncogene                                                     | C-CBL CBL2 FRA11B NSLL RNF55                                 |
| CBLB    | 868   | Cbl proto-oncogene B                                                   | Cbl-b Nbla00127 RNF56                                        |
| IL2     | 3558  | interleukin 2                                                          | IL-2 TCGF lymphokine                                         |
| IL4     | 3565  | interleukin 4                                                          | BCGF-1 BCGF1 BSF-1 BSF1 IL-4                                 |
| IL5     | 3567  | interleukin 5                                                          | EDF IL-5 TRF                                                 |
| IL10    | 3586  | interleukin 10                                                         | CSIF GVHDS IL-10 IL10A TGIF                                  |
| IFNG    | 3458  | interferon gamma                                                       | IFG IFI                                                      |
| CSF2    | 1437  | colony stimulating factor 2                                            | CSF GMCSF                                                    |
| TNF     | 7124  | tumor necrosis factor                                                  | DIF TNF-alpha TNFA TNFSF2 TNLG1F                             |
| CDK4    | 1019  | cyclin dependent kinase 4                                              | CMM3 PSK-J3                                                  |
| RASGRP1 | 10125 | RAS guanyl releasing protein 1                                         | CALDAG-GEFI CALDAG-GEFII IMD64 RASGRP                        |

|        |       |                                                   |                                     |
|--------|-------|---------------------------------------------------|-------------------------------------|
| PDK1   | 5163  | pyruvate dehydrogenase kinase                     | -                                   |
| PLCG1  | 5335  | phospholipase C gamma 1                           | NCKAP3 PLC-II PLC1 PLC148 PLCgamma1 |
| PRKCQ  | 5588  | protein kinase C theta                            | PRKCT nPKC-theta                    |
| TRAC   | 28755 | T cell receptor alpha constant                    | IMD7 TCRA TRA TRCA                  |
| TRAJ1  | 28754 | T cell receptor alpha joining 1 (non-functional)  | -                                   |
| TRAJ2  | 28753 | T cell receptor alpha joining 2 (non-functional)  | -                                   |
| TRAJ3  | 28752 | T cell receptor alpha joining 3                   | -                                   |
| TRAJ4  | 28751 | T cell receptor alpha joining 4                   | -                                   |
| TRAJ5  | 28750 | T cell receptor alpha joining 5                   | -                                   |
| TRAJ6  | 28749 | T cell receptor alpha joining 6                   | -                                   |
| TRAJ7  | 28748 | T cell receptor alpha joining 7                   | -                                   |
| TRAJ8  | 28747 | T cell receptor alpha joining 8                   | -                                   |
| TRAJ9  | 28746 | T cell receptor alpha joining 9                   | -                                   |
| TRAJ10 | 28745 | T cell receptor alpha joining 10                  | -                                   |
| TRAJ11 | 28744 | T cell receptor alpha joining 11                  | -                                   |
| TRAJ12 | 28743 | T cell receptor alpha joining 12                  | -                                   |
| TRAJ13 | 28742 | T cell receptor alpha joining 13                  | -                                   |
| TRAJ14 | 28741 | T cell receptor alpha joining 14                  | -                                   |
| TRAJ15 | 28740 | T cell receptor alpha joining 15                  | -                                   |
| TRAJ16 | 28739 | T cell receptor alpha joining 16                  | -                                   |
| TRAJ17 | 28738 | T cell receptor alpha joining 17                  | -                                   |
| TRAJ18 | 28737 | T cell receptor alpha joining 18                  | -                                   |
| TRAJ19 | 28736 | T cell receptor alpha joining 19 (non-functional) | -                                   |
| TRAJ20 | 28735 | T cell receptor alpha joining 20                  | -                                   |
| TRAJ21 | 28734 | T cell receptor alpha joining 21                  | -                                   |
| TRAJ22 | 28733 | T cell receptor alpha joining 22                  | -                                   |
| TRAJ23 | 28732 | T cell receptor alpha joining 23                  | -                                   |
| TRAJ24 | 28731 | T cell receptor alpha joining 24                  | -                                   |
| TRAJ25 | 28730 | T cell receptor alpha joining 25 (non-functional) | -                                   |
| TRAJ26 | 28729 | T cell receptor alpha joining 26                  | -                                   |
| TRAJ27 | 28728 | T cell receptor alpha joining 27                  | -                                   |
| TRAJ28 | 28727 | T cell receptor alpha joining 28                  | -                                   |
| TRAJ29 | 28726 | T cell receptor alpha joining 29                  | -                                   |
| TRAJ30 | 28725 | T cell receptor alpha joining 30                  | -                                   |
| TRAJ31 | 28724 | T cell receptor alpha joining 31                  | -                                   |
| TRAJ32 | 28723 | T cell receptor alpha joining 32                  | -                                   |
| TRAJ33 | 28722 | T cell receptor alpha joining 33                  | -                                   |
| TRAJ34 | 28721 | T cell receptor alpha joining 34                  | -                                   |
| TRAJ35 | 28720 | T cell receptor alpha joining 35 (non-functional) | -                                   |
| TRAJ36 | 28719 | T cell receptor alpha joining 36                  | -                                   |
| TRAJ37 | 28718 | T cell receptor alpha joining 37                  | -                                   |
| TRAJ38 | 28717 | T cell receptor alpha joining 38                  | -                                   |
| TRAJ39 | 28716 | T cell receptor alpha joining 39                  | -                                   |
| TRAJ40 | 28715 | T cell receptor alpha joining 40                  | -                                   |
| TRAJ41 | 28714 | T cell receptor alpha joining 41                  | -                                   |
| TRAJ42 | 28713 | T cell receptor alpha joining 42                  | -                                   |
| TRAJ43 | 28712 | T cell receptor alpha joining 43                  | -                                   |
| TRAJ44 | 28711 | T cell receptor alpha joining 44                  | -                                   |

|               |       |                                                       |                                           |
|---------------|-------|-------------------------------------------------------|-------------------------------------------|
| TRAJ45        | 28710 | T cell receptor alpha joining 45                      | -                                         |
| TRAJ46        | 28709 | T cell receptor alpha joining 46                      | -                                         |
| TRAJ47        | 28708 | T cell receptor alpha joining 47                      | -                                         |
| TRAJ48        | 28707 | T cell receptor alpha joining 48                      | -                                         |
| TRAJ49        | 28706 | T cell receptor alpha joining 49                      | -                                         |
| TRAJ50        | 28705 | T cell receptor alpha joining 50                      | -                                         |
| TRAJ52        | 28703 | T cell receptor alpha joining 52                      | -                                         |
| TRAJ53        | 28702 | T cell receptor alpha joining 53                      | -                                         |
| TRAJ54        | 28701 | T cell receptor alpha joining 54                      | -                                         |
| TRAJ56        | 28699 | T cell receptor alpha joining 56                      | -                                         |
| TRAJ57        | 28698 | T cell receptor alpha joining 57                      | -                                         |
| TRAJ58        | 28697 | T cell receptor alpha joining 58<br>(non-functional)  | -                                         |
| TRAJ59        | 28696 | T cell receptor alpha joining 59<br>(non-functional)  | -                                         |
| TRAJ61        | 28694 | T cell receptor alpha joining 61<br>(non-functional)  | -                                         |
| TRAV1-1       | 28693 | T cell receptor alpha variable 1-1                    | TCRAV1S1 TCRAV7S1 TRAV11                  |
| TRAV1-2       | 28692 | T cell receptor alpha variable 1-2                    | TCRAV1S2 TCRAV7S2 TRAV12                  |
| TRAV2         | 28691 | T cell receptor alpha variable 2                      | TCRAV11S1 TCRAV2S1                        |
| TRAV3         | 28690 | T cell receptor alpha variable 3                      | TCRAV16S1 TCRAV3S1                        |
| TRAV4         | 28689 | T cell receptor alpha variable 4                      | TCRAV20S1 TCRAV4S1                        |
| TRAV5         | 28688 | T cell receptor alpha variable 5                      | TCRAV15S1 TCRAV5S1                        |
| TRAV7         | 28686 | T cell receptor alpha variable 7                      | TCRAV7S1                                  |
| TRAV8-1       | 28685 | T cell receptor alpha variable 8-1                    | TCRAV1S1 TCRAV8S1 TRAV81                  |
| TRAV8-2       | 28684 | T cell receptor alpha variable 8-2                    | TCRAV1S5 TCRAV8S2 TRAV82                  |
| TRAV8-3       | 28683 | T cell receptor alpha variable 8-3                    | TCRAV1S4 TCRAV8S3 TRAV83                  |
| TRAV8-4       | 28682 | T cell receptor alpha variable 8-4                    | TCRAV1S2 TCRAV8S4 TRAV84                  |
| TRAV8-6       | 28680 | T cell receptor alpha variable 8-6                    | TCRAV1S3 TCRAV8S6 TRAV86                  |
| TRAV8-7       | 28679 | T cell receptor alpha variable 8-7<br>(pseudogene)    | TCRAV8S7 TRAV87                           |
| TRAV9-1       | 28678 | T cell receptor alpha variable 9-1                    | TCRAV9S1 TRAV91                           |
| TRAV9-2       | 28677 | T cell receptor alpha variable 9-2                    | TCRAV22S1 TCRAV9S2 TRAV92                 |
| TRAV10        | 28676 | T cell receptor alpha variable 10                     | TCRAV10S1 TCRAV24S1                       |
| TRAV12-1      | 28674 | T cell receptor alpha variable 12-                    | TCRAV12S1 TCRAV2S3 TRAV121                |
| TRAV12-2      | 28673 | T cell receptor alpha variable 12-                    | TCRAV12S2 TCRAV2S1 TRAV122                |
| TRAV12-3      | 28672 | T cell receptor alpha variable 12-                    | TCRAV12S3 TCRAV2S2 TRAV123                |
| TRAV13-1      | 28671 | T cell receptor alpha variable 13-                    | TCRAV13S1 TCRAV8S1 TRAV131                |
| TRAV13-2      | 28670 | T cell receptor alpha variable 13-                    | TCRAV13S2 TCRAV8S2 TRAV132                |
| TRAV14DV<br>4 | 28669 | T cell receptor alpha variable<br>14/delta variable 4 | TCRAV6S1-<br>hDV104S1 TRAV14/DV4 hADV14S1 |
| TRAV16        | 28667 | T cell receptor alpha variable 16                     | TCRAV16S1 TCRAV9S1                        |
| TRAV17        | 28666 | T cell receptor alpha variable 17                     | TCRAV17S1 TCRAV3S1                        |
| TRAV18        | 28665 | T cell receptor alpha variable 18                     | TCRAV18S1                                 |
| TRAV19        | 28664 | T cell receptor alpha variable 19                     | TCRAV12S1 TCRAV19S1                       |
| TRAV20        | 28663 | T cell receptor alpha variable 20                     | TCRAV20S1 TCRAV30S1                       |
| TRAV21        | 28662 | T cell receptor alpha variable 21                     | TCRAV21S1 TCRAV23S1                       |
| TRAV22        | 28661 | T cell receptor alpha variable 22                     | TCRAV13S1 TCRAV22S1                       |
| TRAV23DV<br>6 | 28660 | T cell receptor alpha variable<br>23/delta variable 6 | TCRAV17S1 TRAV23/DV6 hADV23S1             |
| TRAV24        | 28659 | T cell receptor alpha variable 24                     | TCRAV18S1 TCRAV24S1                       |
| TRAV25        | 28658 | T cell receptor alpha variable 25                     | TCRAV25S1 TCRAV32S1                       |
| TRAV26-1      | 28657 | T cell receptor alpha variable 26-                    | TCRAV26S1 TCRAV4S2 TRAV261                |
| TRAV26-2      | 28656 | T cell receptor alpha variable 26-                    | TCRAV26S2 TCRAV4S1 TRAV262                |

|             |       |                                                      |                                          |
|-------------|-------|------------------------------------------------------|------------------------------------------|
| TRAV27      | 28655 | T cell receptor alpha variable 27                    | TCRAV10S1 TCRAV27S1                      |
| TRAV29DV5   | 28653 | T cell receptor alpha variable 29/delta variable 5   | TCRA TCRAV21S1 TRAV29/DV5 hADV29S1       |
| TRAV30      | 28652 | T cell receptor alpha variable 30                    | TCRAV29S1 TCRAV30S1                      |
| TRAV34      | 28648 | T cell receptor alpha variable 34                    | TCRAV26S1 TCRAV34S1                      |
| TRAV35      | 28647 | T cell receptor alpha variable 35                    | TCRAV25S1 TCRAV35S1                      |
| TRAV36DV7   | 28646 | T cell receptor alpha variable 36/delta variable 7   | TCRAV28S1 TRAV36/DV7 hADV36S1            |
| TRAV38-1    | 28644 | T cell receptor alpha variable 38-                   | TCRAV14S2 TCRAV38S1 TRAV381              |
| TRAV38-2DV8 | 28643 | T cell receptor alpha variable 38-2/delta variable 8 | TCRAV14S1 TRAV382DV8 hADV38S2            |
| TRAV39      | 28642 | T cell receptor alpha variable 39                    | TCRAV27S1 TCRAV39S1                      |
| TRAV40      | 28641 | T cell receptor alpha variable 40                    | TCRAV31S1 TCRAV40S1                      |
| TRAV41      | 28640 | T cell receptor alpha variable 41                    | TCRAV19S1 TCRAV41S1                      |
| TRBC1       | 28639 | T cell receptor beta constant 1                      | BV05S1J2.2 TCRB TCRBC1                   |
| TRBC2       | 28638 | T cell receptor beta constant 2                      | TCRBC2                                   |
| TRBD1       | 28637 | T cell receptor beta diversity 1                     | TCRBD1                                   |
| TRBD2       | 28636 | T cell receptor beta diversity 2                     | TCRBD2                                   |
| TRBJ1-1     | 28635 | T cell receptor beta joining 1-1                     | TCRBJ1S1 TRBJ11                          |
| TRBJ1-2     | 28634 | T cell receptor beta joining 1-2                     | TCRBJ1S2 TRBJ12                          |
| TRBJ1-3     | 28633 | T cell receptor beta joining 1-3                     | TCRBJ1S3 TRBJ13                          |
| TRBJ1-4     | 28632 | T cell receptor beta joining 1-4                     | TCRBJ1S4 TRBJ14                          |
| TRBJ1-5     | 28631 | T cell receptor beta joining 1-5                     | TCRBJ1S5 TRBJ15                          |
| TRBJ1-6     | 28630 | T cell receptor beta joining 1-6                     | TCRBJ1S6 TRBJ16                          |
| TRBJ2-1     | 28629 | T cell receptor beta joining 2-1                     | TCRBJ2S1 TRBJ21                          |
| TRBJ2-2     | 28628 | T cell receptor beta joining 2-2                     | TCRBJ2S2 TRBJ22                          |
| TRBJ2-3     | 28626 | T cell receptor beta joining 2-3                     | TCRBJ2S3 TRBJ23                          |
| TRBJ2-4     | 28625 | T cell receptor beta joining 2-4                     | TCRBJ2S4 TRBJ24                          |
| TRBJ2-5     | 28624 | T cell receptor beta joining 2-5                     | TCRBJ2S5 TRBJ25                          |
| TRBJ2-6     | 28623 | T cell receptor beta joining 2-6                     | TCRBJ2S6 TRBJ26                          |
| TRBJ2-7     | 28622 | T cell receptor beta joining 2-7                     | TCRBJ2S7 TRBJ27                          |
| TRBV2       | 28620 | T cell receptor beta variable 2                      | TCRBV22S1A2N1T TCRBV2S1                  |
| TRBV3-1     | 28619 | T cell receptor beta variable 3-1                    | TCRBV3S1 TCRBV9S1A1T TRBV31              |
| TRBV4-1     | 28617 | T cell receptor beta variable 4-1                    | BV07S1J2.7 TCRBV4S1 TCRBV7S1A1N2T TRBV41 |
| TRBV4-2     | 28616 | T cell receptor beta variable 4-2                    | TCRBV4S2 TCRBV7S3A2 TCRBV7S3A2T TRBV42   |
| TRBV4-3     | 28615 | T cell receptor beta variable 4-3                    | TCRBV4S3 TCRBV7S2A1N4T TRBV43            |
| TRBV5-1     | 28614 | T cell receptor beta variable 5-1                    | TCRBV5S1 TCRBV5S1A1T TRBV51              |
| TRBV5-4     | 28611 | T cell receptor beta variable 5-4                    | TCRBV5S4 TCRBV5S6A3N2T TRBV54            |
| TRBV5-5     | 28610 | T cell receptor beta variable 5-5                    | TCRBV5S3A2T TCRBV5S5 TRBV55              |
| TRBV5-6     | 28609 | T cell receptor beta variable 5-6                    | TCRBV5S2 TCRBV5S6 TRBV56                 |
| TRBV5-7     | 28608 | T cell receptor beta variable 5-7 (non-functional)   | TCRBV5S7 TCRBV5S7P TRBV57                |
| TRBV5-8     | 28607 | T cell receptor beta variable 5-8                    | TCRBV5S4A2T TCRBV5S8 TRBV58              |
| TRBV6-1     | 28606 | T cell receptor beta variable 6-1                    | TCRBV13S3 TCRBV6S1 TRBV61                |
| TRBV6-2     | 28605 | T cell receptor beta variable 6-2                    | TCRBV13S2 TCRBV13S2A1T TCRBV6S2 TRBV62   |
| TRBV6-3     | 28604 | T cell receptor beta variable 6-3                    | TCRBV13S9 13S2A1T TCRBV6S3 TRBV63        |
| TRBV6-4     | 28603 | T cell receptor beta variable 6-4                    | TCRBV13S5 TCRBV6S4 TRBV64                |
| TRBV6-5     | 28602 | T cell receptor beta variable 6-5                    | TCRBV13S1 TCRBV6S5 TRBV65                |
| TRBV6-6     | 28601 | T cell receptor beta variable 6-6                    | TCRBV13S6A2T TCRBV6S6 TRBV66             |



|          |       |                                                    |                                                   |
|----------|-------|----------------------------------------------------|---------------------------------------------------|
| TRBV6-7  | 28600 | T cell receptor beta variable 6-7 (non-functional) | TCRBV13S8P TCRBV6S7 TRBV67                        |
| TRBV6-8  | 28599 | T cell receptor beta variable 6-8                  | TCRBV13S7P TCRBV6S8 TRBV68                        |
| TRBV6-9  | 28598 | T cell receptor beta variable 6-9                  | TCRBV13S4 TCRBV6S9 TRBV69                         |
| TRBV7-2  | 28596 | T cell receptor beta variable 7-2                  | TCRBV6S5A1N1 TCRBV6S5A2 TCRBV7S2 TRBV72           |
| TRBV7-3  | 28595 | T cell receptor beta variable 7-3                  | TCRBV6S1A1N1 TCRBV7S3 TRBV73                      |
| TRBV7-4  | 28594 | T cell receptor beta variable 7-4                  | TCRBV6S8A2T TCRBV7S4 TRBV74                       |
| TRBV7-6  | 28592 | T cell receptor beta variable 7-6                  | TCRBV6S3A1N1T TCRBV7S6 TRBV76                     |
| TRBV7-7  | 28591 | T cell receptor beta variable 7-7                  | TCRBV6S6A2T TCRBV7S7 TRBV77                       |
| TRBV7-8  | 28590 | T cell receptor beta variable 7-8                  | TCRBV6S2A1N1T TCRBV7S8 TRBV78                     |
| TRBV7-9  | 28589 | T cell receptor beta variable 7-9                  | TCRB TCRBV6S4A1 TCRBV7S9 TRBV79                   |
| TRBV9    | 28586 | T cell receptor beta variable 9                    | TCRBV1S1A1N1 TCRBV9S1                             |
| TRBV10-1 | 28585 | T cell receptor beta variable 10-1                 | TCRBV10S1 TCRBV12S2 TCRBV12S2A1T TRBV101          |
| TRBV10-2 | 28584 | T cell receptor beta variable 10-2                 | TCRBV10S2 TCRBV12S3 TRBV102                       |
| TRBV10-3 | 28583 | T cell receptor beta variable 10-3                 | TCRBV10S3 TCRBV12S1A1N2 TRBV103                   |
| TRBV11-1 | 28582 | T cell receptor beta variable 11-1                 | TCRBV11S1 TCRBV21S1 TRBV111                       |
| TRBV11-2 | 28581 | T cell receptor beta variable 11-2                 | TCRBV11S2 TCRBV21S3A2N2T TRBV112                  |
| TRBV11-3 | 28580 | T cell receptor beta variable 11-3                 | TCRBV11S3 TCRBV21S2A2 TRBV113                     |
| TRBV12-3 | 28577 | T cell receptor beta variable 12-3                 | TCRBV12S3 TCRBV8S1 TRBV123                        |
| TRBV12-4 | 28576 | T cell receptor beta variable 12-4                 | TCRBV12S4 TCRBV8S2A1T TRBV124                     |
| TRBV12-5 | 28575 | T cell receptor beta variable 12-5                 | TCRBV12S5 TCRBV8S3 TRBV125                        |
| TRBV13   | 28574 | T cell receptor beta variable 13                   | TCRBV13S1 TCRBV23S1A2T                            |
| TRBV14   | 28573 | T cell receptor beta variable 14                   | TCRBV14S1 TCRBV16S1A1N1                           |
| TRBV15   | 28572 | T cell receptor beta variable 15                   | TCRBV15S1 TCRBV24S1A3T                            |
| TRBV16   | 28571 | T cell receptor beta variable 16                   | BV25S1J1.2 TCRB TCRBV16S1 TCRBV25S1 TCRBV25S1A2PT |
| TRBV17   | 28570 | T cell receptor beta variable 17 (non-functional)  | TCRBV17S1 TCRBV26S1P                              |
| TRBV18   | 28569 | T cell receptor beta variable 18                   | TCRBV18S1                                         |
| TRBV19   | 28568 | T cell receptor beta variable 19                   | TCRBV17S1A1T TCRBV19S1                            |
| TRBV20-1 | 28567 | T cell receptor beta variable 20-1                 | TCRBV20S1 TCRBV2S1 TRBV201                        |
| TRBV24-1 | 28563 | T cell receptor beta variable 24-1                 | TCRBV15S1 TCRBV24S1 TRBV241                       |
| TRBV25-1 | 28562 | T cell receptor beta variable 25-1                 | TCRBV11S1A1T TCRBV25S1 TRBV251                    |
| TRBV27   | 28560 | T cell receptor beta variable 27                   | TCRBV14S1 TCRBV27S1                               |
| TRBV28   | 28559 | T cell receptor beta variable 28                   | TCRBV28S1 TCRBV3S1                                |
| TRBV29-1 | 28558 | T cell receptor beta variable 29-1                 | TCRBV29S1 TCRBV4S1A1T TRBV291                     |
| TRBV30   | 28557 | T cell receptor beta variable 30                   | TCRBV20S1A1N2 TCRBV30S1                           |
| TRDC     | 28526 | T cell receptor delta constant                     | TCRD                                              |
| TRDD1    | 28525 | T cell receptor delta diversity 1                  | -                                                 |
| TRDD2    | 28524 | T cell receptor delta diversity 2                  | -                                                 |
| TRDD3    | 28523 | T cell receptor delta diversity 3                  | TCRD                                              |
| TRDJ1    | 28522 | T cell receptor delta joining 1                    | TCRD                                              |
| TRDJ2    | 28521 | T cell receptor delta joining 2                    | -                                                 |
| TRDJ3    | 28520 | T cell receptor delta joining 3                    | -                                                 |
| TRDJ4    | 28519 | T cell receptor delta joining 4                    | -                                                 |
| TRDV1    | 28518 | T cell receptor delta variable 1                   | hDV101S1                                          |
| TRDV2    | 28517 | T cell receptor delta variable 2                   | hDV102S1                                          |
| TRDV3    | 28516 | T cell receptor delta variable 3                   | hDV103S1                                          |
| TRGV9    | 6983  | T cell receptor gamma variable 9                   | TCRGV9 TRGC1 V2                                   |

|        |        |                                        |                                                                    |
|--------|--------|----------------------------------------|--------------------------------------------------------------------|
| TRGV8  | 6982   | T cell receptor gamma variable 8       | TCRGV8 V1S8                                                        |
| TRGV5  | 6978   | T cell receptor gamma variable 5       | TCRGV5 V1S5                                                        |
| TRGV4  | 6977   | T cell receptor gamma variable 4       | TCRGV4 V1S4                                                        |
| TRGV3  | 6976   | T cell receptor gamma variable 3       | TCRGV3 V1S3                                                        |
| TRGV2  | 6974   | T cell receptor gamma variable 2       | TCRGV2 V1S2                                                        |
| TRGJP2 | 6972   | T cell receptor gamma joining P2       | JP2 TCRGJP2                                                        |
| TRGJP1 | 6971   | T cell receptor gamma joining P1       | JP1 TCRGJP1                                                        |
| TRGJP  | 6970   | T cell receptor gamma joining P        | JP TCRGJP                                                          |
| TRGJ2  | 6969   | T cell receptor gamma joining 2        | J2 TCRGJ2                                                          |
| TRGJ1  | 6968   | T cell receptor gamma joining 1        | J1 TCRGJ1                                                          |
| TRGC2  | 6967   | T cell receptor gamma constant         | TCRGC2 TRGC2(2X) TRGC2(3X)                                         |
| TRGC1  | 6966   | T cell receptor gamma constant         | C1 TCRG TCRGC1                                                     |
| TRAV6  | 6956   | T cell receptor alpha variable 6       | TCRAV5S1 TCRAV6S1                                                  |
| BMP1   | 649    | bone morphogenetic protein 1           | OI13 PCOLC PCP PCP2 TLD                                            |
| BMP10  | 27302  | bone morphogenetic protein 10          | -                                                                  |
| BMP15  | 9210   | bone morphogenetic protein 15          | GDF9B ODG2 POF4                                                    |
| BMP2   | 650    | bone morphogenetic protein 2           | BDA2 BMP2A SSFSC                                                   |
| BMP3   | 651    | bone morphogenetic protein 3           | BMP-3A                                                             |
| BMP4   | 652    | bone morphogenetic protein 4           | BMP2B BMP2B1 MCOPS6 OFC11 ZYME                                     |
| BMP5   | 653    | bone morphogenetic protein 5           | -                                                                  |
| BMP6   | 654    | bone morphogenetic protein 6           | VGR VGR1                                                           |
| BMP7   | 655    | bone morphogenetic protein 7           | OP-1                                                               |
| BMP8A  | 353500 | bone morphogenetic protein 8a          | OP-2                                                               |
| BMP8B  | 656    | bone morphogenetic protein 8b          | BMP8 OP2                                                           |
| GDF1   | 2657   | growth differentiation factor 1        | CERS1 CHTD6 DORV DTGA3 LAG1 LAS<br>S1 RAI UOG1                     |
| GDF10  | 2662   | growth differentiation factor 10       | BIP BMP-3b BMP3B                                                   |
| GDF11  | 10220  | growth differentiation factor 11       | BMP-11 BMP11                                                       |
| GDF15  | 9518   | growth differentiation factor 15       | GDF-15 MIC-1 MIC1 NAG-<br>1 PDF PLAB PTGFB                         |
| GDF2   | 2658   | growth differentiation factor 2        | BMP-9 BMP9 HHT5                                                    |
| GDF3   | 9573   | growth differentiation factor 3        | KFS3 MCOP7 MCOPCB6                                                 |
| GDF5   | 8200   | growth differentiation factor 5        | BDA1C BMP-<br>14 BMP14 CDMP1 DUPANS LAP-<br>4 LAP4 OS5 SYM1B SYNS2 |
| GDF6   | 392255 | growth differentiation factor 6        | BMP-<br>13 BMP13 CDMP2 KFM KFS KFS1 KFSL <br>SGM1 SYNS4            |
| GDF7   | 151449 | growth differentiation factor 7        | BMP12                                                              |
| GDF9   | 2661   | growth differentiation factor 9        | POF14                                                              |
| GDNF   | 2668   | glial cell derived neurotrophic factor | ATF ATF1 ATF2 HFB1-GDNF HSCR3                                      |
| INHA   | 3623   | inhibin subunit alpha                  | -                                                                  |
| INHBA  | 3624   | inhibin subunit beta A                 | EDF FRP                                                            |
| INHBB  | 3625   | inhibin subunit beta B                 | -                                                                  |
| INHBC  | 3626   | inhibin subunit beta C                 | IHBC                                                               |
| INHBE  | 83729  | inhibin subunit beta E                 | -                                                                  |
| LEFTY1 | 10637  | left-right determination factor 1      | LEFTB LEFTYB                                                       |
| LEFTY2 | 7044   | left-right determination factor 2      | EBAF LEFTA LEFTYA TGFB4                                            |
| NODAL  | 4838   | nodal growth differentiation factor    | HTX5                                                               |
| TGFB1  | 7040   | transforming growth factor beta 1      | CED DPD1 IBDIMDE LAP TGF-<br>beta1 TGFB TGFBeta                    |
| TGFB2  | 7042   | transforming growth factor beta 2      | G-TSF LDS4 TGF-beta2                                               |

|            |        |                                             |                                                                                     |
|------------|--------|---------------------------------------------|-------------------------------------------------------------------------------------|
| TGFB3      | 7043   | transforming growth factor beta 3           | ARVD ARVD1 LDS5 RNHF TGF-beta3                                                      |
| ACVR1B     | 91     | activin A receptor type 1B                  | ACTRIB ACVRLK4 ALK4 SKR2                                                            |
| ACVR1C     | 130399 | activin A receptor type 1C                  | ACVRLK7 ALK7                                                                        |
| ACVR2A     | 92     | activin A receptor type 2A                  | ACTRII ACVR2                                                                        |
| ACVR2B     | 93     | activin A receptor type 2B                  | ACTRIIB ActR-IIB HTX4                                                               |
| ACVRL1     | 94     | activin A receptor like type 1              | ACVRLK1 ALK-1 ALK1 HHT HHT2 ORW2 SKR3 TSR-1                                         |
| AMHR2      | 269    | anti-Mullerian hormone receptor type 2      | AMHR MISR2 MISRII MRII                                                              |
| BMPR1A     | 657    | bone morphogenetic protein receptor type 1A | 10q23del ACVRLK3 ALK3 CD292 SKR5                                                    |
| BMPR1B     | 658    | bone morphogenetic protein receptor type 1B | ALK-6 ALK6 AMDD BDA1D BDA2 CDw293                                                   |
| BMPR2      | 659    | bone morphogenetic protein receptor type 2  | BMPR-II BMPR3 BMR2 BRK-3 POVD1 PPH1 T-ALK                                           |
| TGFBR1     | 7046   | transforming growth factor beta receptor 1  | AAT5 ACVRLK4 ALK-5 ALK5 ESS1 LDS1 LDS1A LDS2A MSS E SKR4 TBR-i TBRI TGFR-1 tbetaR-I |
| TGFBR2     | 7048   | transforming growth factor beta receptor 2  | AAT3 FAA3 LDS1B LDS2 LDS2B MFS2 RIIC TAAD2 TBR-ii TBRII TGFR-2 TGFbeta-RII          |
| TGFBR3     | 7049   | transforming growth factor beta receptor 3  | BGCAN betaglycan                                                                    |
| TNFRSF11 B | 4982   | TNF receptor superfamily member 11b         | OCIF OPG PDB5 TR1                                                                   |
| TNFSF10    | 8743   | TNF superfamily member 10                   | APO2L Apo-2L CD253 TL2 TNLG6A TRAIL                                                 |
| TNFSF11    | 8600   | TNF superfamily member 11                   | CD254 ODF OPGL OPTB2 RANKL TNLG6B TRANCE hRANKL2 sOdf                               |
| TNFSF12    | 8742   | TNF superfamily member 12                   | APO3L DR3LG TNLG4A TWEAK                                                            |
| TNFSF13    | 8741   | TNF superfamily member 13                   | APRIL CD256 TALL-2 TALL2 TNLG7B TRDL-1 UNQ383/PRO715 ZTNF2                          |
| TNFSF13B   | 10673  | TNF superfamily member 13b                  | BAFF BLYS CD257 DTL TALL-1 TALL1 THANK TNFSF20 TNLG7A ZTNF4                         |
| TNFSF14    | 8740   | TNF superfamily member 14                   | CD258 HVEM LIGHT LTg                                                                |
| TNFSF15    | 9966   | TNF superfamily member 15                   | TL1 TL1A TNLG1B VEGI VEGI192A                                                       |
| TNFSF18    | 8995   | TNF superfamily member 18                   | AITRL GITRL TL6 TNLG2A hGITRL                                                       |
| TNFSF4     | 7292   | TNF superfamily member 4                    | CD134L CD252 GP34 OX-40L OX4OL TNLG2B TXGP1                                         |
| TNFSF8     | 944    | TNF superfamily member 8                    | CD153 CD30L CD30LG TNLG3A                                                           |
| TNFSF9     | 8744   | TNF superfamily member 9                    | 4-1BB-L CD137L TNLG5A                                                               |
| TNFRSF10 B | 8795   | TNF receptor superfamily member 10b         | CD262 DR5 KILLER KILLER/DR5 TRAIL-R2 TRAILR2 TRICK2 TRICK2A TRICK2B TRICKB ZTNFR9   |
| TNFRSF10 C | 8794   | TNF receptor superfamily member 10c         | CD263 DCR1 DCR1-TNFR LIT TRAIL-R3 TRAILR3 TRID                                      |
| TNFRSF10 D | 8793   | TNF receptor superfamily member 10d         | CD264 DCR2 TRAIL-R4 TRAILR4 TRUNDD                                                  |
| TNFRSF11 A | 8792   | TNF receptor superfamily member 11a         | CD265 FEO LOH18CR1 ODFR OFE OPTB7 OSTS PDB2 RANK TRANCER                            |
| TNFRSF12 A | 51330  | TNF receptor superfamily member 12A         | CD266 FN14 TWEAKR                                                                   |

|           |        |                                     |                                                                               |
|-----------|--------|-------------------------------------|-------------------------------------------------------------------------------|
| TNFRSF13B | 23495  | TNF receptor superfamily member 13B | CD267 CVID CVID2 IGAD2 RYZN TACI TNFRSF14B                                    |
| TNFRSF13C | 115650 | TNF receptor superfamily member 13C | BAFF-R BAFFR BROMIX CD268 CVID4 prolixin                                      |
| TNFRSF14  | 8764   | TNF receptor superfamily member 14  | ATAR CD270 HVEA HVEM LIGHTR TR2                                               |
| TNFRSF17  | 608    | TNF receptor superfamily member 17  | BCM BCMA CD269 TNFRSF13A                                                      |
| TNFRSF18  | 8784   | TNF receptor superfamily member 18  | AITR CD357 ENERGEN GITR GITR-D                                                |
| TNFRSF19  | 55504  | TNF receptor superfamily member 19  | TAJ TAJ-alpha TRADE TROY                                                      |
| TNFRSF1A  | 7132   | TNF receptor superfamily member 1A  | CD120a FPF TBP1 TNF-R TNF-R-I TNF-R55 TNFAR TNFR1 TNFR55 TNFR60 p55 p55-R p60 |
| TNFRSF1B  | 7133   | TNF receptor superfamily member 1B  | CD120b TBPII TNF-R-II TNF-R75 TNFBR TNFR1B TNFR2 TNFR80 p75 p75TNFR           |
| TNFRSF21  | 27242  | TNF receptor superfamily member 21  | BM-018 CD358 DR6                                                              |
| TNFRSF25  | 8718   | TNF receptor superfamily member 25  | APO-3 DDR3 DR3 GEF720 LARD PLEKHG5 TNFRSF12 TR3 TRAMP WSL-1 WSL-LR            |
| TNFRSF4   | 7293   | TNF receptor superfamily member 4   | ACT35 CD134 IMD16 OX40 TXGP1L                                                 |
| TNFRSF6B  | 8771   | TNF receptor superfamily member 6b  | DCR3 DJ583P15.1.1 M68 M68E TR6                                                |
| TNFRSF8   | 943    | TNF receptor superfamily member 8   | CD30 D1S166E Ki-1                                                             |
| TNFRSF9   | 3604   | TNF receptor superfamily member 9   | 4-1BB CD137 CDw137 ILA                                                        |
